# Supplementary material for: Pacific climate reflected in Waipuna Cave drip water hydrochemistry
Source: Copernicus journal article supplement (doi:10.5194/hess-24-3361-2020), 2020-07-01

*Supplement of*

**Pacific climate reflected in Waipuna Cave dripwater hydrochemistry**

**Nava-Fernández et al.**

Correspondence to: Cinthya E. Nava Fernández ([cinthya.navafernandez@rub.de](mailto:cinthya.navafernandez@rub.de))


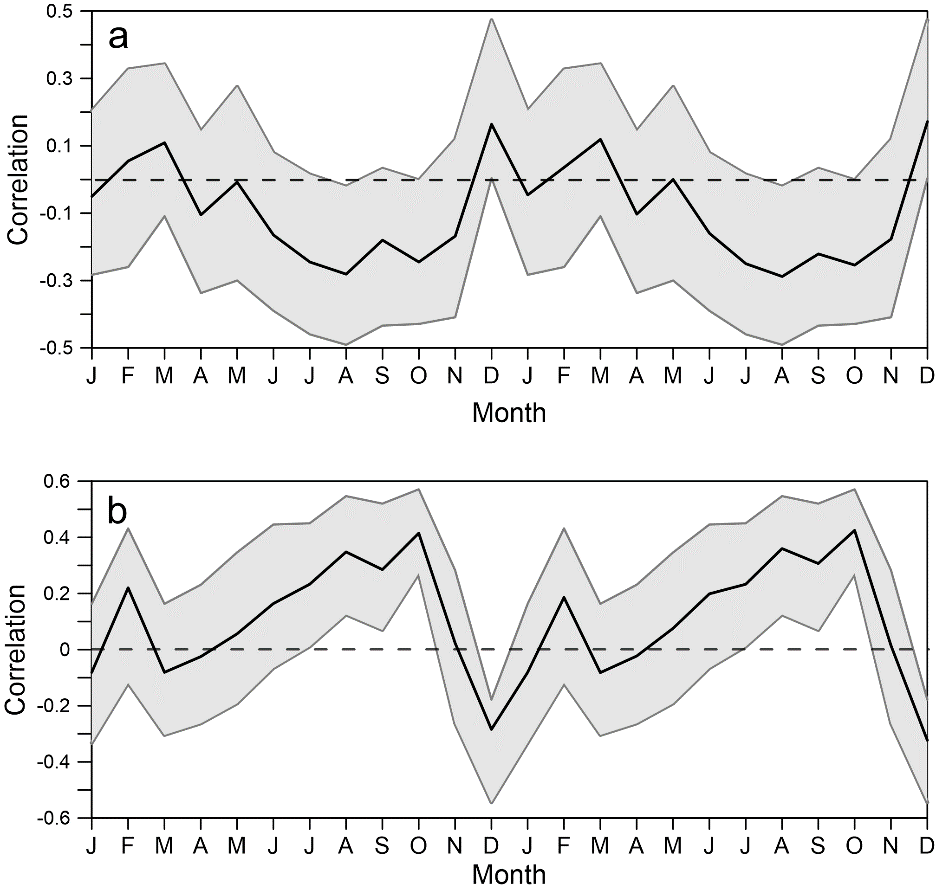
**S1.** Time series correlations of a) New Plymouth rainfall anomalies vs Nino3.4 1951-2004 and b) New Plymouth rainfall anomalies vs SOI 1951- 2004 (<https://climexp.knmi.nl/start.cgi>).

**
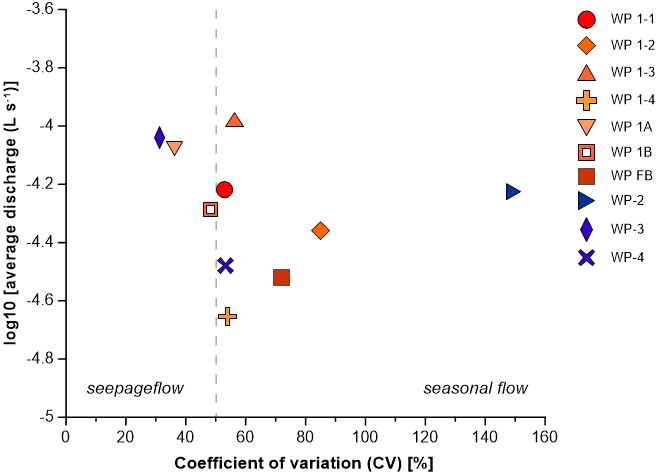
S2.** Waipuna Cave drip sites organized by their discharge variability according to the classification of Smart and Friederich 1987.

**S3.**17O versus 18O values of Waipuna Cave dripwaters (pink circles) and Waipuna stream (green diamonds).

**
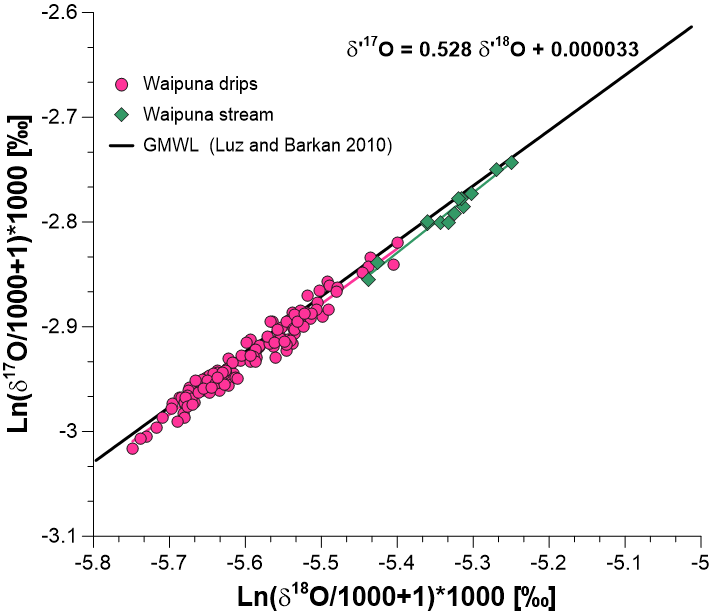
**

**S4.** Dripwater D time series of all drips grouped according to the three main response lags (5, 18, and 24 days) to antecedent rainfall (AR) at Otorohanga Glenbrook station (blue vertical bars).


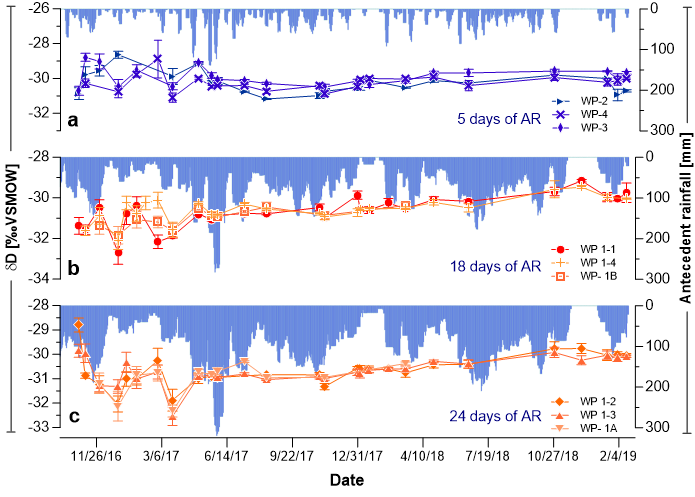


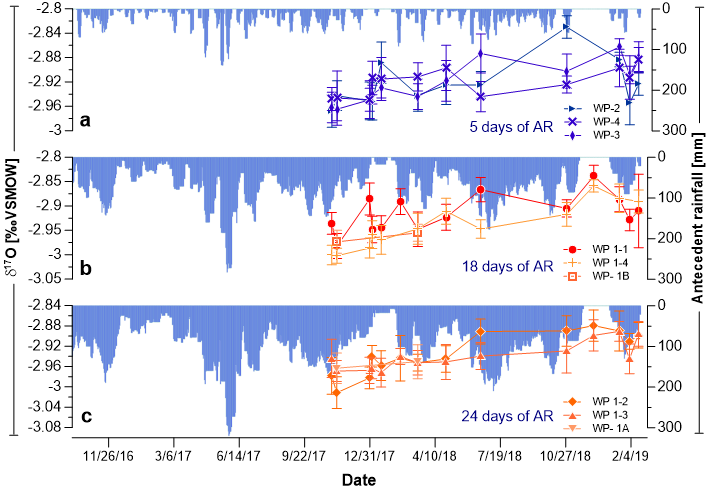
**S5.** Dripwater 17O time series of all drips grouped according to the three main response lags (5, 18, and 24 days) to antecedent rainfall (AR) at Otorohanga Glenbrook station (blue vertical bars).


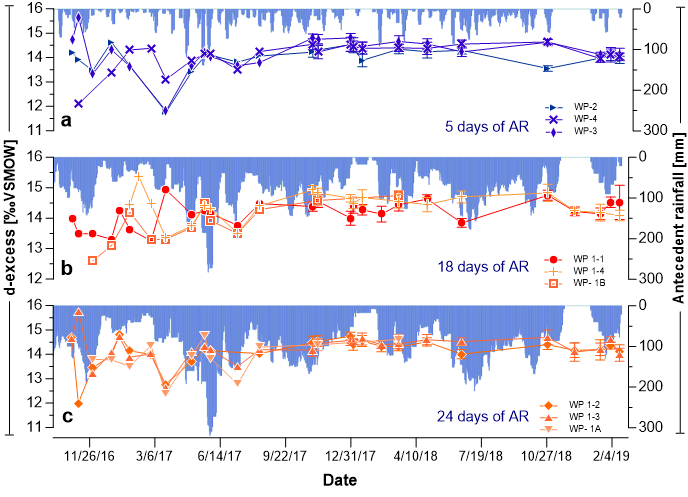
**S6.** Dripwater d-excess of all drips grouped according to the three main response lags (5, 18, and 24 days) to antecedent rainfall (AR) at Otorohanga Glenbrook station (blue vertical bars).

**S7.** Dripwater Sr/Ca ratios of all drips grouped according to the three main response lags (5, 18, and 24 days) to antecedent rainfall (AR) at Otorohanga Glenbrook station (blue vertical bars).


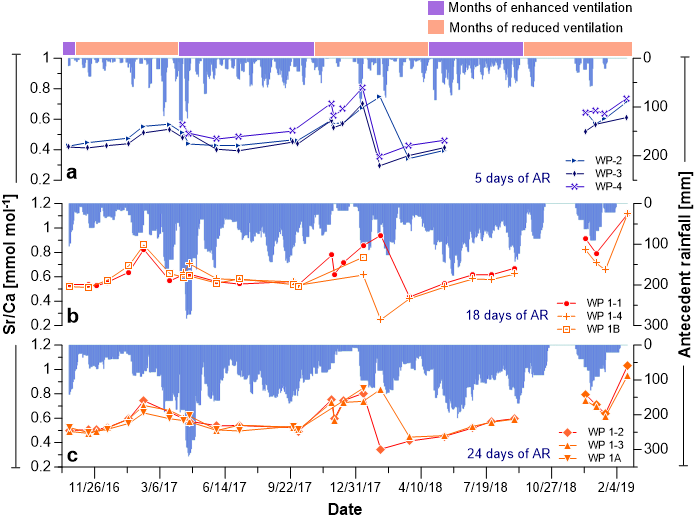


**S8.** Mg/Ca and Sr/Ca ratios sorted by the period of reduced ventilation November-March (orange circles) and enhanced ventilation April-October (blue diamonds), showing the importance of water supply on elemental dynamics, and minimal influence of ventilation regime on PCP strength. The secondary group of blue samples following a lower slope are related to post-La Niña samples that received above-normal water supply and indicate reduced PCP above the cave.


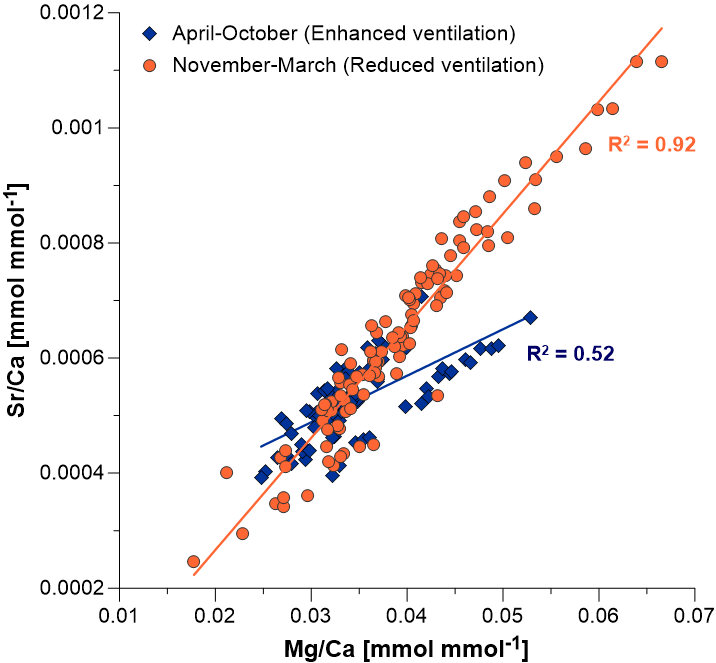

Supplement: Supplementary file 1 [file HESS-2019-647_Nava-Fernandez_Supplement.docx]
