# Supplementary material for: Pacific climate reflected in Waipuna Cave drip water hydrochemistry
Source: Copernicus journal article supplement (doi:10.5194/hess-24-3361-2020), 2020-07-01

# Pacific climate reflected in Waipuna Cave dripwater hydrochemistry

Nava-Fernández et al.

Correspondence to: Cinthya E. Nava Fernández ([cinthya.navafernandez@rub.de](mailto:cinthya.navafernandez@rub.de))

**S1.** Time series correlations of a) New Plymouth rainfall anomalies vs Nino3.4 1951-2004 and b) New Plymouth rainfall anomalies vs SOI 1951- 2004 (<https://climexp.knmi.nl/start.cgi>).

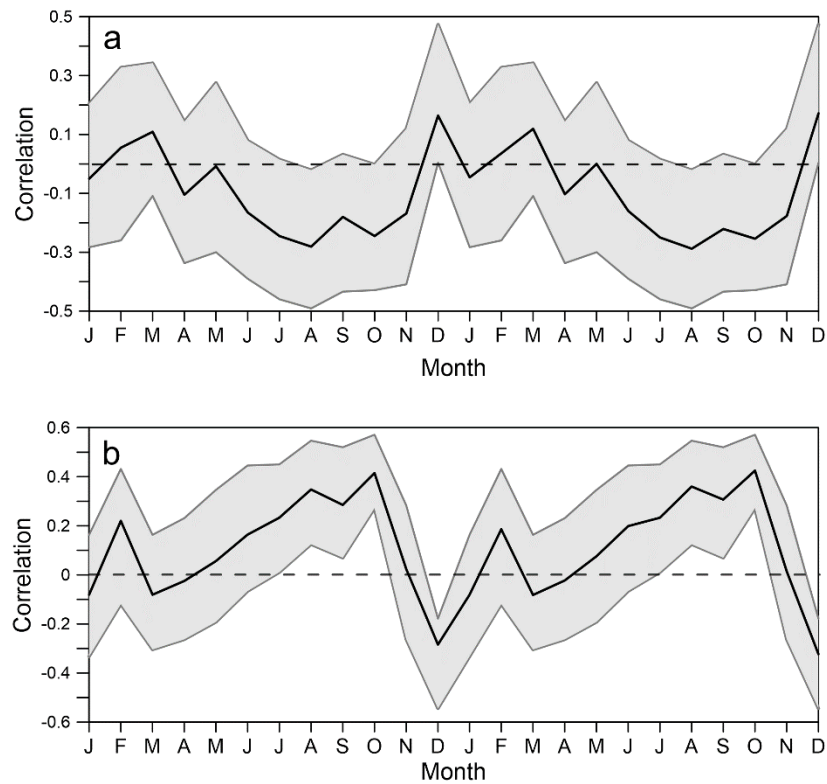

**S2.** Waipuna Cave drip sites organized by their discharge variability according to the classification of Smart and Friederich 1987.

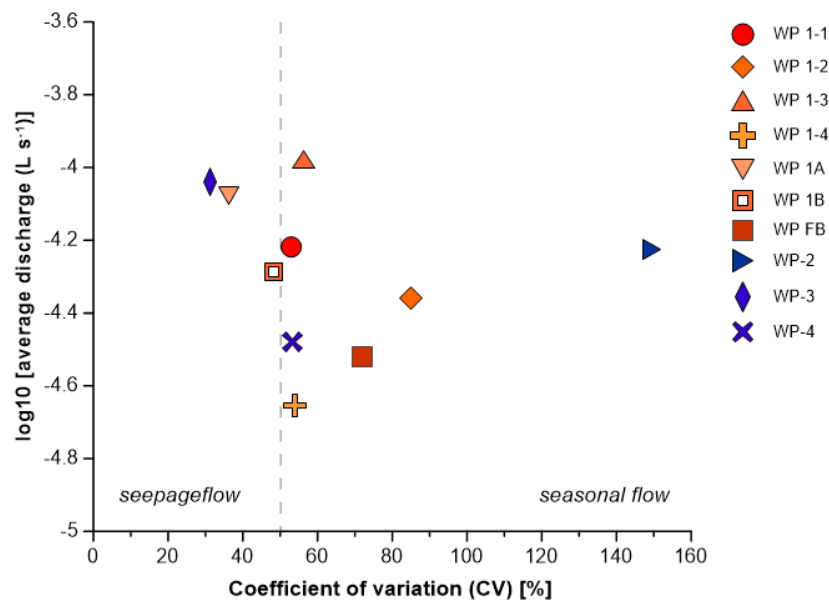

**S3.**  $\delta^{17}\text{O}$  versus  $\delta^{18}\text{O}$  values of Waipuna Cave dripwaters (pink circles) and Waipuna stream (green diamonds).

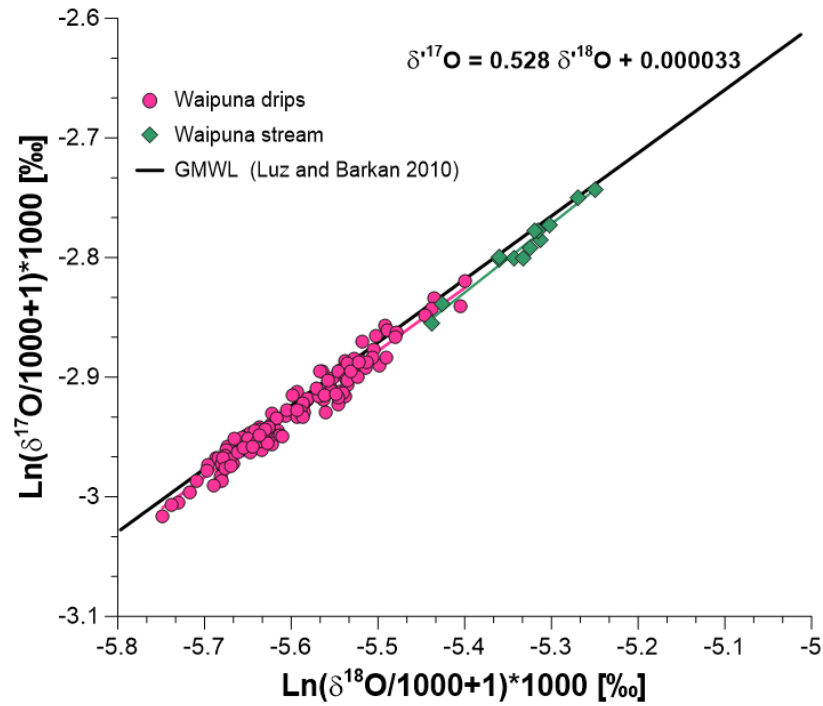

**S4.** Dripwater  $\delta\text{D}$  time series of all drips grouped according to the three main response lags (5, 18, and 24 days) to antecedent rainfall (AR) at Otorohanga Glenbrook station (blue vertical bars).

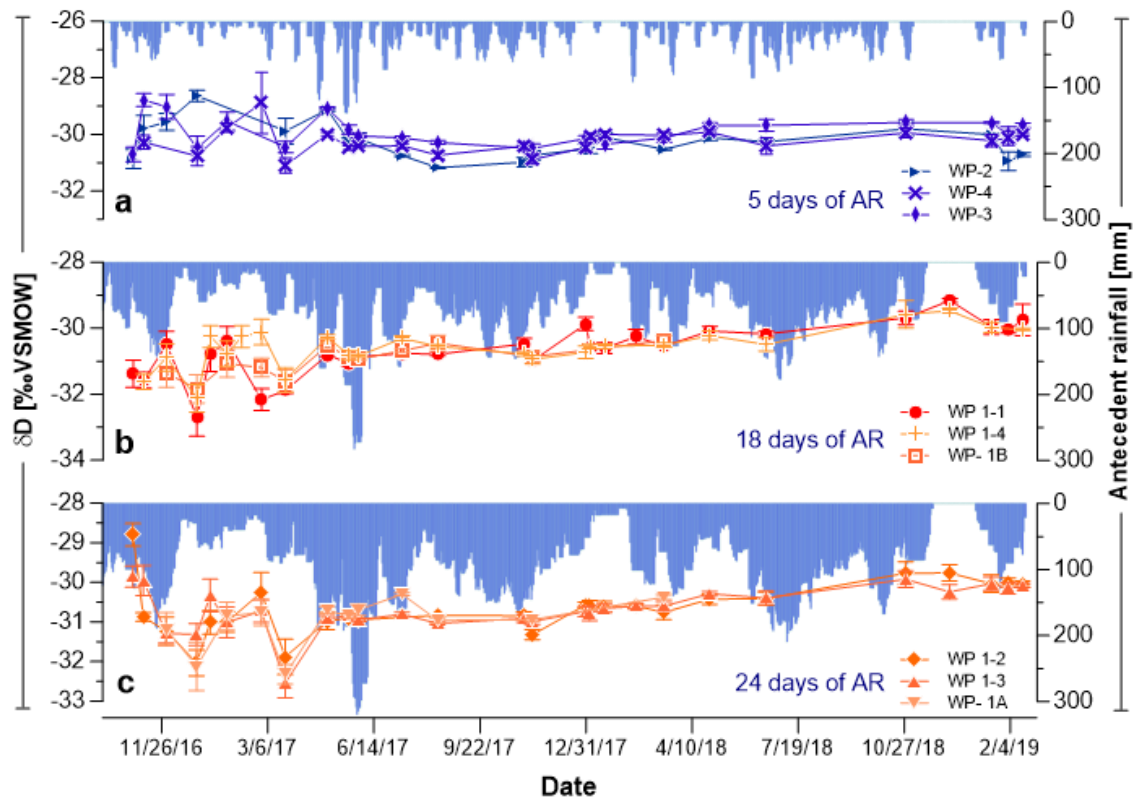

**S5.** Dripwater  $\delta^{17}\text{O}$  time series of all drips grouped according to the three main response lags (5, 18, and 24 days) to antecedent rainfall (AR) at Otorohanga Glenbrook station (blue vertical bars).

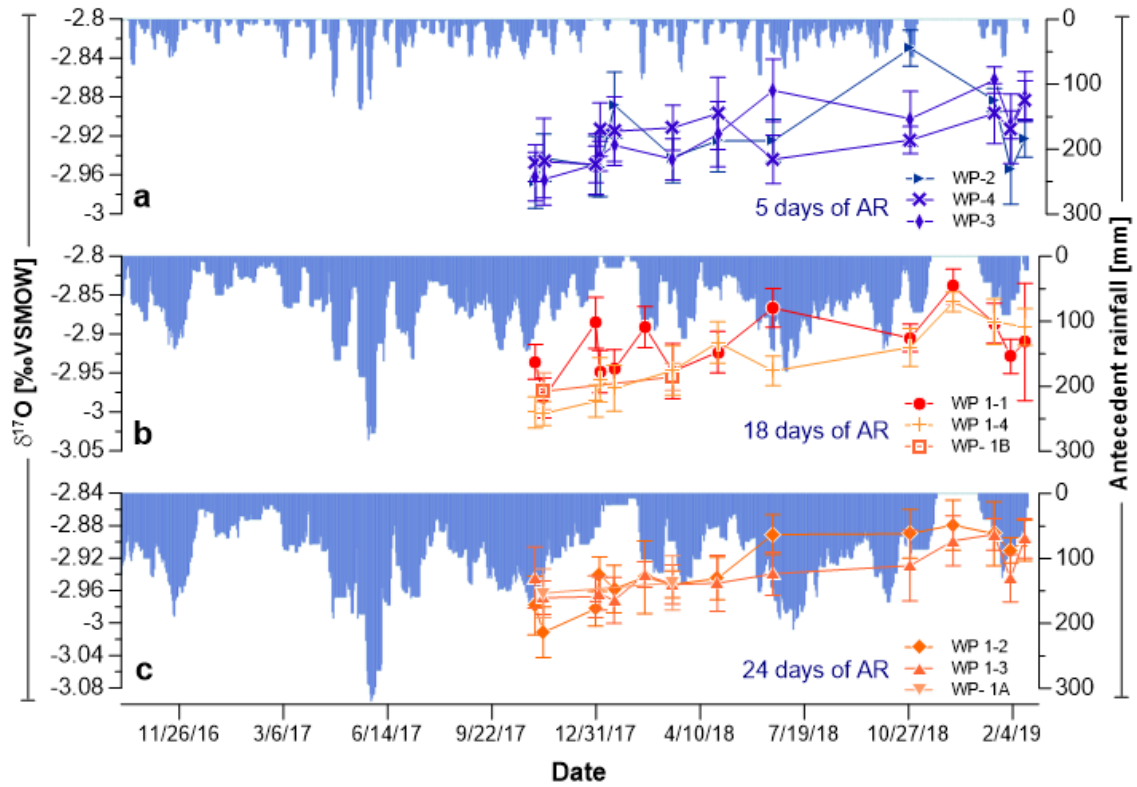

**S6.** Dripwater d-excess of all drips grouped according to the three main response lags (5, 18, and 24 days) to antecedent rainfall (AR) at Otorohanga Glenbrook station (blue vertical bars).

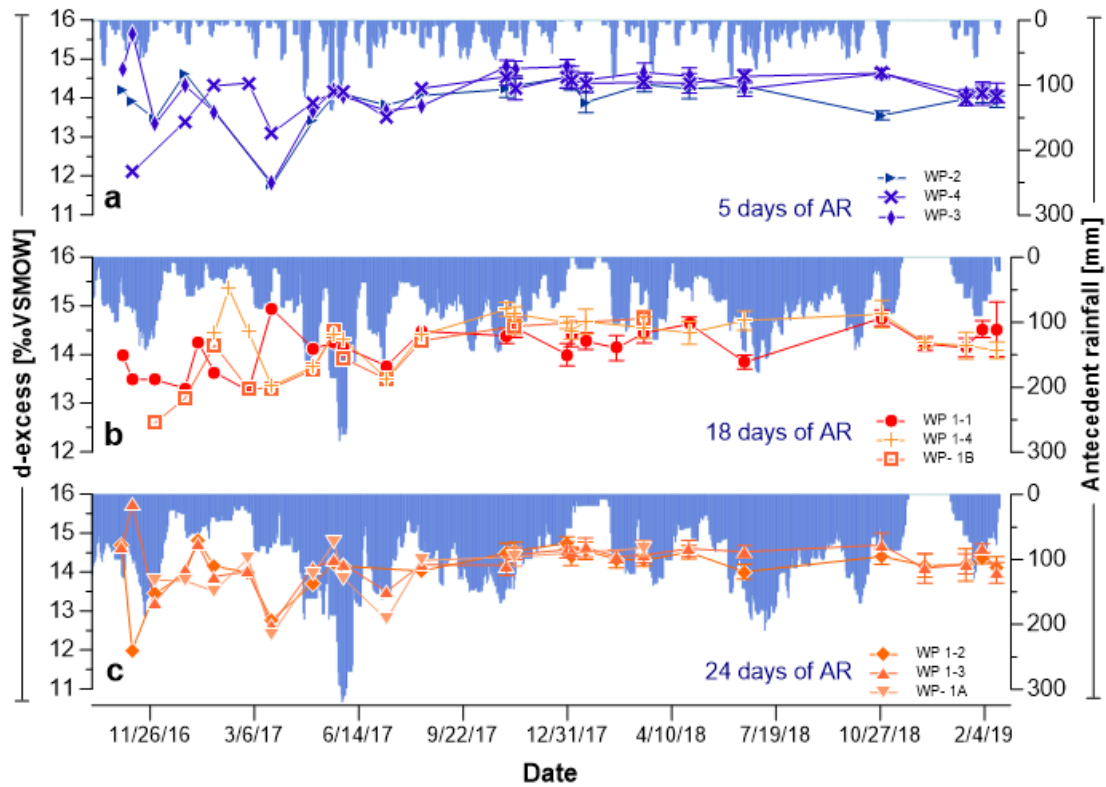

**S7.** Dripwater Sr/Ca ratios of all drips grouped according to the three main response lags (5, 18, and 24 days) to antecedent rainfall (AR) at Otorohanga Glenbrook station (blue vertical bars).

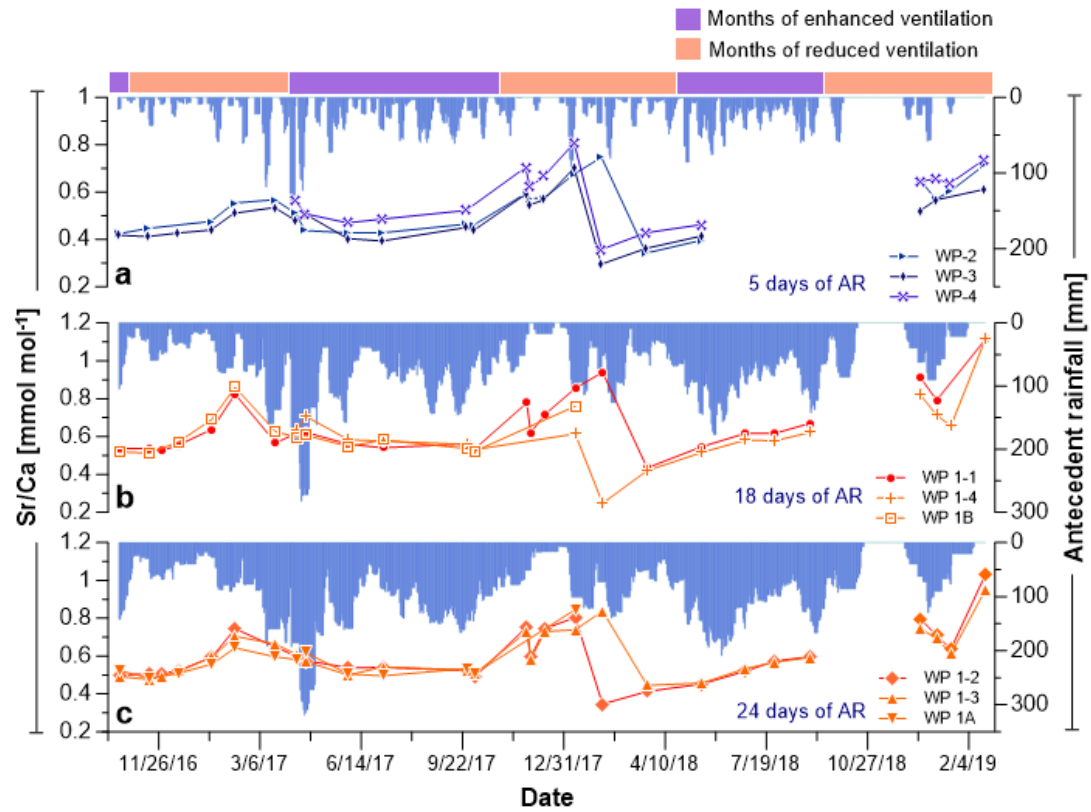

**S8.** Mg/Ca and Sr/Ca ratios sorted by the period of reduced ventilation November-March (orange circles) and enhanced ventilation April-October (blue diamonds), showing the importance of water supply on elemental dynamics, and minimal influence of ventilation regime on PCP strength. The secondary group of blue samples following a lower slope are related to post-La Niña samples that received above-normal water supply and indicate reduced PCP above the cave.

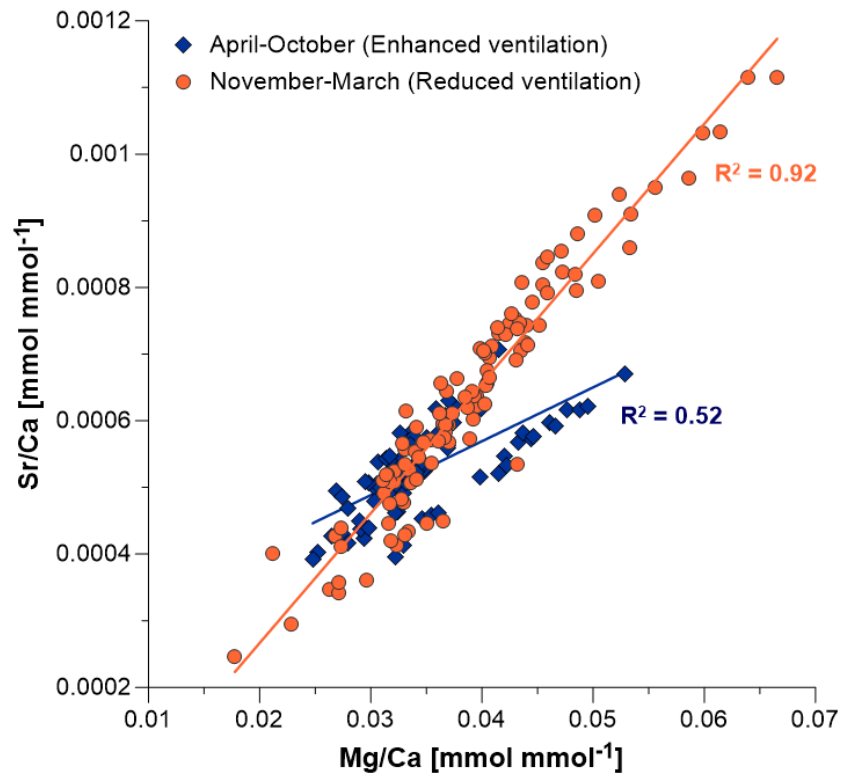

Supplement: Supplementary file 3 [file hess-24-3361-2020-supplement.zip]
