# Supplementary material for: Pacific climate reflected in Waipuna Cave drip water hydrochemistry
Source: Copernicus journal article supplement (doi:10.5194/hess-24-3361-2020), 2020-07-01
Supplement: Supplementary file 1 [file hess-24-3361-2020-supplement.zip]

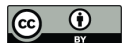

## *Supplement of*

# **Pacific climate reflected in Waipuna Cave drip water hydrochemistry**

**Cinthyia Nava-Fernandez et al.**

*Correspondence to:* Cinthyia Nava-Fernandez ([cinthya.navafernandez@rub.de](mailto:cinthya.navafernandez@rub.de))

- [hess-24-3361-2020-supplement-title-page.pdf](#)
- [HESS-2019-647\\_Nava-Fernandez\\_Supplement.docx](#)
- [HESS-2019-647\\_Nava-Fernandez\\_Supplement.pdf](#)
- [HESS-2019-647\\_figure\\_tables.xlsx](#)
- [S1.pdf](#)
- [S2.pdf](#)
- [S3.pdf](#)
- [S4.pdf](#)
- [S5.pdf](#)
- [S6.pdf](#)
- [S7.pdf](#)
- [S8.pdf](#)

The copyright of individual parts of the supplement might differ from the CC BY 4.0 License.
