# Supplementary material for: Pacific climate reflected in Waipuna Cave drip water hydrochemistry
Source: Copernicus journal article supplement (doi:10.5194/hess-24-3361-2020), 2020-07-01
Supplement: Supplementary file 2 [file HESS-2019-647_figure_tables.xlsx]

## Sheet: Table_Fig5
Date	WP 1-1 Driprate (drip/min)		Date	WP 1-2 Driprate (drips/min)		Date	WP 1-3 Driprate (drips/min)		Date	WP-2 Driprate (drip/min)
2016-06-15	57.2833		2017-10-04	17.8451		2017-10-04	64.7727		2017-10-04 23:30:00	118.89
2016-06-16	56.0653		2017-10-05	18.0403		2017-10-05	64.0069		2017-10-05 23:30:00	111.024
2016-06-17	56.2306		2017-10-06	17.7118		2017-10-06	63.216		2017-10-06 23:30:00	107.703
2016-06-18	56.5486		2017-10-07	16.9604		2017-10-07	62.4181		2017-10-07 23:30:00	104.903
2016-06-19	56.3556		2017-10-08	16.425		2017-10-08	60.8306		2017-10-08 23:30:00	74.3535
2016-06-20	55.8264		2017-10-09	16.7618		2017-10-09	61.4639		2017-10-09 23:30:00	43.0271
2016-06-21	53.2611		2017-10-10	18.8819		2017-10-10	66.7437		2017-10-10 23:30:00	84
2016-06-22	50.9514		2017-10-11	19.8465		2017-10-11	69.0257		2017-10-11 23:30:00	118.912
2016-06-23	49.6472		2017-10-12	20.7701		2017-10-12	70.2069		2017-10-12 23:30:00	98.2174
2016-06-24	52.2722		2017-10-13	21.2882		2017-10-13	70.0444		2017-10-13 23:30:00	80.909
2016-06-25	61.8111		2017-10-14	21.5507		2017-10-14	69.9722		2017-10-14 23:30:00	63.2563
2016-06-26	69.25		2017-10-15	19.7576		2017-10-15	66.7701		2017-10-15 23:30:00	48.8472
2016-06-27	72.2194		2017-10-16	19.2778		2017-10-16	65.4806		2017-10-16 23:30:00	41.0465
2016-06-28	78.4847		2017-10-17	19.1868		2017-10-17	64.7458		2017-10-17 23:30:00	46.4931
2016-06-29	84.0542		2017-10-18	18.9146		2017-10-18	64.009		2017-10-18 23:30:00	83.7687
2016-06-30	80.7861		2017-10-19	18.7146		2017-10-19	63.8944		2017-10-19 23:30:00	74.1743
2016-07-01	81.5861		2017-10-20	17.8451		2017-10-20	62.0826		2017-10-20 23:30:00	57.5326
2016-07-02	82.0944		2017-10-21	17.2132		2017-10-21	60.2674		2017-10-21 23:30:00	66.0882
2016-07-03	81.2583		2017-10-22	16.5792		2017-10-22	59.0153		2017-10-22 23:30:00	54.5056
2016-07-04	79.0556		2017-10-23	16.3396		2017-10-23	58.2167		2017-10-23 23:30:00	27.5264
2016-07-05	78.2889		2017-10-24	16.1771		2017-10-24	57.4986		2017-10-24 23:30:00	29.7833
2016-07-06	76.3333		2017-10-25	15.9903		2017-10-25	56.9375		2017-10-25 23:30:00	26.6125
2016-07-07	72.7389		2017-10-26	15.8181		2017-10-26	55.8618		2017-10-26 23:30:00	27.1236
2016-07-08	67.2153		2017-10-27	14.6986		2017-10-27	53.0708		2017-10-27 23:30:00	20.8833
2016-07-09	61.5042		2017-10-28	13.1417		2017-10-28	49.1486		2017-10-28 23:30:00	24.0556
2016-07-10	62.1917		2017-10-29	12.4028		2017-10-29	47.1215		2017-10-29 23:30:00	71.4389
2016-07-11	63.1278		2017-10-30	11.4868		2017-10-30	45.1486		2017-10-30 23:30:00	32.2424
2016-07-12	60.9014		2017-10-31	10.9771		2017-10-31	43.6333		2017-10-31 23:30:00	30.4924
2016-07-13	59.9278		2017-11-01	10.6701		2017-11-01	42.4049		2017-11-01 23:30:00	29.216
2016-07-14	54.4514		2017-11-02	10.509		2017-11-02	41.5813		2017-11-02 23:30:00	26.8451
2016-07-15	52.1944		2017-11-03	10.3		2017-11-03	40.6264		2017-11-03 23:30:00	36.8715
2016-07-16	50.2236		2017-11-04	10.4847		2017-11-04	40.7125		2017-11-04 23:30:00	75.9361
2016-07-17	50.8806		2017-11-05	11.1319		2017-11-05	42.3868		2017-11-05 23:30:00	92.7486
2016-07-18	51.475		2017-11-06	12.7778		2017-11-06	45.4132		2017-11-06 23:30:00	85.4222
2016-07-19	52.0236		2017-11-07	14.4132		2017-11-07	49.8854		2017-11-07 23:30:00	65.9431
2016-07-20	53.1319		2017-11-08	15.0736		2017-11-08	51.6861		2017-11-08 23:30:00	90.9868
2016-07-21	55.15		2017-11-09	16.425		2017-11-09	55.309		2017-11-09 23:30:00	104.969
2016-07-22	55.6819		2017-11-10	16.0562		2017-11-10	55.2035		2017-11-10 23:30:00	71.4486
2016-07-23	56.7597		2017-11-11	16.1646		2017-11-11	55.3382		2017-11-11 23:30:00	72.9132
2016-07-24	57.2694		2017-11-12	16.8465		2017-11-12	56.3521		2017-11-12 23:30:00	50.0507
2016-07-25	60.9903		2017-11-13	17.2396		2017-11-13	57.2785		2017-11-13 23:30:00	33.4924
2016-07-26	66.7014		2017-11-14	17.2667		2017-11-14	57.325		2017-11-14 23:30:00	23.3799
2016-07-27	69.4958		2017-11-15	16.7882		2017-11-15	56.7972		2017-11-15 23:30:00	26.8188
2016-07-28	70.775		2017-11-16	17.0201		2017-11-16	55.641		2017-11-16 23:30:00	21.1889
2016-07-29	69.9458		2017-11-17	16.3007		2017-11-17	53.6889		2017-11-17 23:30:00	19.0458
2016-07-30	69.7639		2017-11-18	16.1319		2017-11-18	53.3778		2017-11-18 23:30:00	19.6271
2016-07-31	68.6472		2017-11-19	15.8653		2017-11-19	53.1257		2017-11-19 23:30:00	19.6181
2016-08-01	68.8375		2017-11-20	15.8451		2017-11-20	52.5875		2017-11-20 23:30:00	18.9812
2016-08-02	67.2556		2017-11-21	15.4292		2017-11-21	51.2972		2017-11-21 23:30:00	14.8514
2016-08-03	71.4181		2017-11-22	13.9715		2017-11-22	48.1931		2017-11-22 23:30:00	12.6687
2016-08-04	72.6778		2017-11-23	12.6139		2017-11-23	45.1562		2017-11-23 23:30:00	10.9347
2016-08-05	69.8375		2017-11-24	10.7986		2017-11-24	41.2069		2017-11-24 23:30:00	5.89722
2016-08-06	67.1278		2017-11-25	11.3035		2017-11-25	40.9896		2017-11-25 23:30:00	1.17361
2016-08-07	73.0167		2017-11-26	10.8236		2017-11-26	39.5361		2017-11-26 23:30:00	1.17083
2016-08-08	79.1944		2017-11-27	10.5826		2017-11-27	38.3368		2017-11-27 23:30:00	1.04375
2016-08-09	79.3319		2017-11-28	8.50417		2017-11-28	33.0444		2017-11-28 23:30:00	1.03125
2016-08-10	83.5167		2017-11-29	9.76806		2017-11-29	34.6146		2017-11-29 23:30:00	1.68611
2016-08-11	77.5		2017-11-30	9.33125		2017-11-30	32.7493		2017-11-30 23:30:00	14.3944
2016-08-12	71.4778		2017-12-01	9.05764		2017-12-01	31.4778		2017-12-01 23:30:00	3.72361
2016-08-13	69.9944		2017-12-02	8.79097		2017-12-02	29.8986		2017-12-02 23:30:00	2.67847
2016-08-14	67.5167		2017-12-03	8.24931		2017-12-03	27.6979		2017-12-03 23:30:00	3.36389
2016-08-15	65.4306		2017-12-04	7.68958		2017-12-04	26.3174		2017-12-04 23:30:00	3.05417
2016-08-16	64.1681		2017-12-05	7.06806		2017-12-05	25.0118		2017-12-05 23:30:00	8.79028
2016-08-17	62.6778		2017-12-06	6.84375		2017-12-06	24.35		2017-12-06 23:30:00	15.6042
2016-08-18	61.8111		2017-12-07	6.20417		2017-12-07	17.3049		2017-12-07 23:30:00	14.3549
2016-08-19	60.7847		2017-12-08	5.95208					2017-12-08 23:30:00	13.5243
2016-08-20	55.3111		2017-12-09	5.78681					2017-12-09 23:30:00	12.9868
2016-08-21	50.6319		2017-12-10	5.19375					2017-12-10 23:30:00	12.1771
2016-08-22	47.6958		2017-12-11	4.44028					2017-12-11 23:30:00	12.6042
2016-08-23	46.8611		2017-12-12	3.63542					2017-12-12 23:30:00	11.8
2016-08-24	45.1972		2017-12-13	3.40833					2017-12-13 23:30:00	12.2375
2016-08-25	43.7431		2017-12-14	3.18819					2017-12-14 23:30:00	11.8569
2016-08-26	43.5083		2017-12-15	3.18889					2017-12-15 23:30:00	9.82014
2016-08-27	46.625		2017-12-16	3.15278					2017-12-16 23:30:00	8.59792
2016-08-28	52.6347		2017-12-17	2.59792					2017-12-17 23:30:00	9.36181
2016-08-29	55.9931		2017-12-18	1.93125					2017-12-18 23:30:00	10.5097
2016-08-30	60.7708		2017-12-19	1.72014					2017-12-19 23:30:00	10.7375
2016-08-31	67.3028		2017-12-20	1.39097					2017-12-20 23:30:00	12.3076
2016-09-01	70.2875		2017-12-21	1.36875					2017-12-21 23:30:00	10.7028
2016-09-02	72.8292		2017-12-22	1.21944					2017-12-22 23:30:00	9.82083
2016-09-03	69.5833		2017-12-23	1.24236					2017-12-23 23:30:00	8.55347
2016-09-04	70.6167		2017-12-24	0.992361					2017-12-24 23:30:00	7.95417
2016-09-05	69.3542		2017-12-25	0.55					2017-12-25 23:30:00	7.60208
2016-09-06	70.1069		2017-12-26	0.2125					2017-12-26 23:30:00	8.14236
2016-09-07	70.5083		2017-12-27	0.132639					2017-12-27 23:30:00	7.06042
2016-09-08	69.1597		2017-12-28	-0.0270833					2017-12-28 23:30:00	5.67153
2016-09-09	68.5208		2017-12-29	-0.278472					2017-12-29 23:30:00	5.54306
2016-09-10	71.2681		2017-12-30	-0.596528					2017-12-30 23:30:00	4.96042
2016-09-11	71.8583		2017-12-31	-0.829861					2017-12-31 23:30:00	4.85069
2016-09-12	75.0639		2018-01-01	-1.01528					2018-01-01 23:30:00	4.73333
2016-09-13	76.8361		2018-01-02	-1.09583					2018-01-02 23:30:00	4.18889
2016-09-14	76.8444		2018-01-03	-1.31111					2018-01-03 23:30:00	3.85139
2016-09-15	75.5458		2018-01-04	-1.53958					2018-01-04 23:30:00	5.50417
2016-09-16	37.175		2018-01-05	-1.33125					2018-01-05 23:30:00	43.9604
2016-09-17	36.2681		2018-01-06	4.02778					2018-01-06 23:30:00	94.0438
2016-09-18	34.8333		2018-01-07	11.8444					2018-01-07 23:30:00	101.368
2016-09-19	36.3417		2018-01-08	21.8875					2018-01-08 23:30:00	54.9632
2016-09-20	37.8361		2018-01-09	24.9361					2018-01-09 23:30:00	35.6313
2016-09-21	39.7208		2018-01-10	27.5611					2018-01-11 23:30:00	25.2368
2016-09-22	40.0972		2018-01-11	26.1236					2018-01-12 23:30:00	24.2382
2016-09-23	40.4389		2018-01-12	28.2479					2018-01-13 23:30:00	23.3396
2016-09-25	38.8889		2018-01-13	28.3479					2018-01-14 23:30:00	22.3472
2016-09-26	39.3386		2018-01-14	28.5521					2018-01-15 23:30:00	20.9542
2016-09-27 23:38:00	40.3333		2018-01-15	27.0049					2018-01-16 23:30:00	20.7785
2016-09-28 23:38:00	41.6965		2018-01-16	25.8924					2018-01-17 23:30:00	19.2667
2016-09-29 23:38:00	43.4049		2018-01-17	24.3028					2018-01-18 23:30:00	51.3854
2016-09-30 23:38:00	46.6729		2018-01-18	19.7514					2018-01-19 23:30:00	60.7153
2016-10-01 23:38:00	48.0927		2018-01-19	15.4806					2018-01-20 23:30:00	71.7979
2016-10-02 23:38:00	47.5493		2018-01-20	13.175					2018-01-21 23:30:00	45.5778
2016-10-03 23:38:00	46.0938		2018-01-21	12.3826					2018-01-22 23:30:00	46.8486
2016-10-04 23:38:00	43.9146		2018-01-22	15.3569					2018-01-23 23:30:00	105.328
2016-10-05 23:38:00	41.5076		2018-01-23	19.2729					2018-01-24 23:30:00	87.4236
2016-10-06 23:38:00	40.9854		2018-01-24	22.6292					2018-01-25 23:30:00	75.9813
2016-10-07 23:38:00	44.65		2018-01-25	24.8264					2018-01-26 23:30:00	58.8146
2016-10-08 23:38:00	47.3722		2018-01-26	25.7472					2018-01-27 23:30:00	55.9729
2016-10-09 23:38:00	47.6278		2018-01-27	26.5188					2018-01-28 23:30:00	40.7944
2016-10-10 23:38:00	49.1243		2018-01-28	26.2507					2018-01-29 23:30:00	28.9903
2016-10-11 23:38:00	46.3507		2018-01-29	26.3847					2018-01-30 23:30:00	26.4215
2016-10-12 23:38:00	41.3917		2018-01-30	26.4729					2018-01-31 23:30:00	25.7194
2016-10-13 23:38:00	39.8451		2018-01-31	24.2118					2018-02-01 23:30:00	20.7667
2016-10-14 23:38:00	37.7514		2018-02-01	19.2069					2018-02-02 23:30:00	105.546
2016-10-15 23:38:00	36.0972		2018-02-02	18.4347					2018-02-03 23:30:00	76.3681
2016-10-16 23:38:00	35.7368		2018-02-03	18.2771					2018-02-04 23:30:00	61.3319
2016-10-17 23:38:00	35.0528		2018-02-04	22.575					2018-02-05 23:30:00	53.2549
2016-10-18 23:46:00	32.0882		2018-02-05	24.4431					2018-02-06 23:30:00	42.241
2016-10-19 23:46:00	33.134		2018-02-06	26.0007					2018-02-07 23:30:00	27.391
2016-10-20 23:46:00	32.3562		2018-02-07	25.9042					2018-02-08 23:30:00	62.2188
2016-10-21 23:46:00	31.7368		2018-02-08	26.4382					2018-02-09 23:30:00	63.5444
2016-10-22 23:46:00	31.3097		2018-02-09	22.5514					2018-02-10 23:30:00	58.609
2016-10-23 23:46:00	30.3438		2018-02-10	19.8118					2018-02-11 23:30:00	40.6465
2016-10-24 23:46:00	29.2743		2018-02-11	18.4354					2018-02-12 23:30:00	116.923
2016-10-25 23:46:00	27.3444		2018-02-12	27.1729					2018-02-13 23:30:00	148.028
2016-10-26 23:46:00	25.7292		2018-02-13	38.6264					2018-02-14 23:30:00	75.2042
2016-10-27 23:46:00	24.1882		2018-02-14	37.6972					2018-02-15 23:30:00	97.4694
2016-10-28 23:46:00	23.0069		2018-02-15	41.3653					2018-02-16 23:30:00	120.735
2016-10-29 23:46:00	22.3368		2018-02-16	41.6653					2018-02-17 23:30:00	113.747
2016-10-30 23:46:00	21.5111		2018-02-17	40.2528					2018-02-18 23:30:00	177.135
2016-10-31 23:46:00	21.1007		2018-02-18	40.0722					2018-02-19 23:30:00	156.473
2016-11-01 23:46:00	20.5285		2018-02-19	36.7708					2018-02-20 23:30:00	114.858
2016-11-02 23:46:00	19.9306		2018-02-20	31.8625					2018-02-21 23:30:00	74.2319
2016-11-03 23:46:00	19.4792		2018-02-21	27.4528					2018-02-22 23:30:00	36.8215
2016-11-04 23:46:00	18.8687		2018-02-22	25.4569					2018-02-23 23:30:00	52.9979
2016-11-05 23:46:00	18.6986		2018-02-23	23.9465					2018-02-24 23:30:00	48.7382
2016-11-06 23:46:00	18.3347		2018-02-24	23.1264					2018-02-25 23:30:00	42.6264
2016-11-07 23:46:00	17.8361		2018-02-25	22.1556					2018-02-26 23:30:00	32.3785
2016-11-08 23:46:00	18.0535		2018-02-26	21.1597					2018-02-27 23:30:00	56.2313
2016-11-09 23:46:00	17.8597		2018-02-27	21.4146					2018-02-28 23:30:00	80.8931
2016-11-10 23:46:00	18.4187		2018-02-28	20.4576					2018-03-01 23:30:00	50.175
2016-11-11 23:46:00	19.2028		2018-03-01	18.5826					2018-03-02 23:30:00	41.684
2016-11-12 23:46:00	19.5806		2018-03-02	16.2118					2018-03-03 23:30:00	38.0549
2016-11-13 23:46:00	20.3097		2018-03-03	14.3132					2018-03-04 23:30:00	35.5667
2016-11-14 23:46:00	22.6069		2018-03-04	13.4354					2018-03-05 23:30:00	29.725
2016-11-15 23:46:00	22.5194		2018-03-05	13.2111					2018-03-06 23:30:00	23.9299
2016-11-16 23:53:00	21.966		2018-03-06	12.0924					2018-03-07 23:30:00	32.2924
2016-11-17 23:53:00	24.0806		2018-03-07	10.9083					2018-03-08 23:30:00	69.0826
2016-11-18 23:53:00	26.5854		2018-03-08	10.1813					2018-03-09 23:30:00	60.7042
2016-11-19 23:53:00	28.0868		2018-03-09	9.89444					2018-03-10 23:30:00	40.1306
2016-11-20 23:53:00	28.8306		2018-03-10	9.89444					2018-03-11 23:30:00	41.2111
2016-11-21 23:53:00	29.9951		2018-03-11	10.341					2018-03-12 23:30:00	30.1736
2016-11-22 23:53:00	30.2576		2018-03-12	11.6174					2018-03-13 23:30:00	25.4854
2016-11-23 23:53:00	30.6722		2018-03-13	12.8507					2018-03-14 23:30:00	23.4625
2016-11-24 23:53:00	30.325		2018-03-14	15.5528					2018-03-15 23:30:00	23.166
2016-11-25 23:53:00	28.9924		2018-03-15	13.2812					2018-03-16 23:30:00	23.3215
2016-11-26 23:53:00	28.6778		2018-03-16	12.1257					2018-03-17 23:30:00	21.7528
2016-11-27 23:53:00	28.1403		2018-03-17	11.384					2018-03-18 23:30:00	20.3465
2016-11-28 23:53:00	28.4007		2018-03-18	10.9382					2018-03-19 23:30:00	20.7319
2016-11-29 23:53:00	28.5187		2018-03-19	10.5271					2018-03-20 23:30:00	20.5146
2016-11-30 23:53:00	27.9736		2018-03-20	9.73472					2018-03-21 23:30:00	19.5944
2016-12-01 23:53:00	26.1771		2018-03-21	9.06875					2018-03-22 23:30:00	18.3875
2016-12-02 23:53:00	24.1458		2018-03-22	8.10903					2018-03-23 23:30:00	31.3007
2016-12-03 23:53:00	22.6979		2018-03-23	7.20764					2018-03-24 23:30:00	52.8396
2016-12-04 23:53:00	21.7458		2018-03-24	7.34444					2018-03-25 23:30:00	41.8208
2016-12-05 23:53:00	21.084		2018-03-25	7.27986					2018-03-26 23:30:00	21.7194
2016-12-06 23:53:00	20.5688		2018-03-26	7.09097					2018-03-27 23:30:00	18.7576
2016-12-07 23:53:00	20.2639		2018-03-27	6.77083					2018-03-28 23:30:00	16.8535
2016-12-08 23:53:00	19.5938		2018-03-28	6.38819					2018-03-29 23:30:00	17.7778
2016-12-09 23:53:00	19.2757		2018-03-29	6.03403					2018-03-30 23:30:00	17.6854
2016-12-10 23:53:00	18.8056		2018-03-30	5.81944					2018-03-31 23:30:00	16.6444
2016-12-11 23:53:00	18.4042		2018-03-31	5.58819					2018-04-01 23:30:00	15.0729
2016-12-12 23:53:00	17.9722		2018-04-01	5.54236					2018-04-02 23:30:00	14.8118
2016-12-13 23:53:00	17.0986		2018-04-02	5.42222					2018-04-03 23:30:00	14.5743
2016-12-14 23:53:00	16.8625		2018-04-03	5.15417					2018-04-04 23:30:00	14.8375
2016-12-15 23:53:00	15.3611		2018-04-04	4.95694					2018-04-05 23:30:00	14.0104
2016-12-16 23:53:00	16.1451		2018-04-05	4.80694					2018-04-06 23:30:00	13.659
2016-12-17 23:53:00	16.0736		2018-04-06	4.65903					2018-04-07 23:30:00	13.4604
2016-12-18 23:53:00	15.7458		2018-04-07	4.44167					2018-04-08 23:30:00	12.8035
2016-12-19 23:53:00	15.1521		2018-04-08	4.19861					2018-04-09 23:30:00	13.6201
2016-12-20 23:53:00	14.9396		2018-04-09	3.94583					2018-04-10 23:30:00	32.5722
2016-12-21 23:53:00	14.616		2018-04-10	3.45278					2018-04-11 23:30:00	57.8076
2016-12-22 23:53:00	14.3319		2018-04-11	3.46181					2018-04-12 23:30:00	22.4111
2016-12-23 23:53:00	13.8771		2018-04-12	3.57917					2018-04-13 23:30:00	19.2431
2016-12-24 23:53:00	13.8896		2018-04-13	3.60556					2018-04-14 23:30:00	58.7743
2016-12-25 23:53:00	13.775		2018-04-14	3.62639					2018-04-15 23:30:00	31.5194
2016-12-26 23:53:00	13.4924		2018-04-15	3.80069					2018-04-16 23:30:00	55.0993
2016-12-27 23:53:00	13.3556		2018-04-16	4.08056					2018-04-17 23:30:00	91.4965
2016-12-28 23:53:00	13.1674		2018-04-17	6					2018-04-18 23:30:00	77.5424
2016-12-29 23:53:00	12.9493		2018-04-18	13.1528					2018-04-19 23:30:00	61.3931
2016-12-30 23:53:00	12.8361		2018-04-19	26.8889					2018-04-20 23:30:00	51.4465
2016-12-31 23:53:00	12.6694		2018-04-20	33.4292					2018-04-21 23:30:00	47.3125
2017-01-01 23:53:00	12.4		2018-04-21	36.1063					2018-04-22 23:30:00	33.5743
2017-01-02 23:53:00	12.1333		2018-04-22	36.5396					2018-04-23 23:30:00	28.4819
2017-01-03 23:53:00	11.9799		2018-04-23	39.1049					2018-04-24 23:30:00	27.0097
2017-01-04 23:53:00	11.9014		2018-04-24	36.7146					2018-04-25 23:30:00	26.4431
2017-01-05 23:53:00	11.7188		2018-04-25	36.1701					2018-04-26 23:30:00	25.541
2017-01-06 23:53:00	11.6931		2018-04-26	35.1431					2018-04-27 23:30:00	24.8188
2017-01-07 23:53:00	11.3771		2018-04-27	29.459					2018-04-28 23:30:00	38.1549
2017-01-08 23:53:00	11.1597		2018-04-28	22.5063					2018-04-29 23:30:00	82.3729
2017-01-09 23:53:00	11.0076		2018-04-29	21.3465					2018-04-30 23:30:00	134.844
2017-01-10 23:53:00	10.8271		2018-04-30	25.1					2018-05-01 23:30:00	86.7368
2017-01-11 23:53:00	10.2125		2018-05-01	31.9382					2018-05-02 23:30:00	87.766
2017-01-12 23:53:00	9.61667		2018-05-02	39.5208					2018-05-03 23:30:00	75.4924
2017-01-13 23:53:00	9.24861		2018-05-03	44.6354					2018-05-04 23:30:00	65.9403
2017-01-14 23:53:00	9.14653		2018-05-04	46.1569					2018-05-05 23:30:00	56.3479
2017-01-15 23:53:00	8.96667		2018-05-05	44.6771					2018-05-06 23:30:00	60.0681
2017-01-16 23:53:00	8.87222		2018-05-06	43.7576					2018-05-07 23:30:00	47.7722
2017-01-17 23:53:00	8.15139		2018-05-07	43.9896					2018-05-08 23:30:00	42.2056
2017-01-18 23:53:00	8.64722		2018-05-08	44.5882					2018-05-09 23:30:00	38.2188
2017-01-19 23:53:00	8.15833		2018-05-09	44.9132					2018-05-10 23:30:00	36.1771
2017-01-20 23:53:00	8.17361		2018-05-10	45.2604					2018-05-11 23:30:00	33.3306
2017-01-21 23:53:00	8.40694		2018-05-11	41.4431					2018-05-12 23:30:00	30.4708
2017-01-22 23:53:00	8.12431		2018-05-12	39.8375					2018-05-13 23:30:00	7.65486
2017-01-23 23:53:00	8.44306		2018-05-13	51.7917					2018-05-14 22:30:00	102.244
2017-01-24 23:53:00	9.65417		2018-05-14	62.066					2018-05-15 23:30:00	197.967
2017-01-25 23:53:00	10.5681		2018-05-15	63.3					2018-05-16 23:30:00	153.765
2017-01-26 23:53:00	11.2597		2018-05-16	58.3861					2018-05-17 23:30:00	117.645
2017-01-27 23:53:00	11.4972		2018-05-17	62.0514					2018-05-18 23:30:00	183.124
2017-01-28 23:53:00	11.0778		2018-05-18	65.7674					2018-05-19 23:30:00	136.174
2017-01-29 23:53:00	10.7931		2018-05-19	66.8486					2018-05-20 23:30:00	109.944
2017-01-30 23:53:00	10.6938		2018-05-20	65.3542					2018-05-21 23:30:00	100.051
2017-01-31 23:53:00	10.4868		2018-05-21	65.5972					2018-05-22 23:30:00	118.09
2017-02-01 23:53:00	10.2931		2018-05-22	65.7979					2018-05-23 23:30:00	66.1688
2017-02-02 23:53:00	10.3118		2018-05-23	63.7611					2018-05-24 23:30:00	82.0479
2017-02-03 23:53:00	10.2444		2018-05-24	67.3111					2018-05-25 23:30:00	56.8347
2017-02-04 23:53:00	10.2701		2018-05-25	63.8007					2018-05-26 23:30:00	74.1965
2017-02-05 23:53:00	10.2646		2018-05-26	64.4701					2018-05-27 23:30:00	109.474
2017-02-06 23:53:00	10.0604		2018-05-27	66.1444					2018-05-28 23:30:00	111.903
2017-02-07 23:53:00	9.95278		2018-05-28	68.0354					2018-05-29 23:30:00	110.072
2017-02-08 23:53:00	9.84653		2018-05-29	67.6556					2018-05-30 23:30:00	99.6208
2017-02-09 23:53:00	9.18264		2018-05-30	64.9972					2018-05-31 23:30:00	91.8493
2017-02-10 23:53:00	9.58889		2018-05-31	60.9174					2018-06-01 23:30:00	79.9451
2017-02-11 23:53:00	9.40486		2018-06-01	58.8472					2018-06-02 23:30:00	71.884
2017-02-12 23:53:00	9.27083		2018-06-02	54.3312					2018-06-03 20:30:00	57.2508
2017-02-13 23:53:00	9.14306		2018-06-03	47.5597
2017-02-14 23:53:00	9.01181		2018-06-04	42.5139
2017-02-15 23:53:00	8.83125		2018-06-05	40.5451
2017-02-16 23:53:00	8.59653		2018-06-06	41.2868
2017-02-17 23:53:00	8.78958		2018-06-07	41.2868
2017-02-18 23:53:00	9.32222		2018-06-09	39.8813
2017-02-19 23:53:00	9.775		2018-06-10	37.5931
2017-02-20 23:53:00	10.3958		2018-06-11	35.8507
2017-02-21 23:53:00	14.3972		2018-06-12	30.8569
2017-02-22 23:53:00	20.2125		2018-06-13	31.4604
2017-02-23 23:53:00	19.0951		2018-06-14	33.1153
2017-02-24 23:53:00	20.7396		2018-06-15	33.4361
2017-02-25 23:53:00	21.0097		2018-06-16	31.0347
2017-02-26 23:53:00	20.4583		2018-06-17	29.7799
2017-02-27 23:53:00	18.7021		2018-06-18	29.3097
2017-02-28 23:53:00	17.2278		2018-06-19	29.7396
2017-03-01 23:53:00	15.6479		2018-06-20	30.9507
2017-03-02 23:53:00	14.5354		2018-06-21	30.4444
2017-03-03 23:53:00	13.7444		2018-06-22	30.7333
2017-03-04 23:53:00	12.9118		2018-06-23	30.8583
2017-03-05 23:53:00	12.4799		2018-06-24	30.0847
2017-03-06 23:53:00	12.0069		2018-06-25	27.5021
2017-03-07 23:53:00	11.3903		2018-06-26	27.209
2017-03-08 23:53:00	11.6299		2018-06-27	29.5632
2017-03-09 23:53:00	13.2083		2018-06-28	30.4875
2017-03-10 23:53:00	16.2472		2018-06-29	33.4722
2017-03-11 23:53:00	19.5361		2018-06-30	34.9576
2017-03-12 23:53:00	23.2181		2018-07-01	33.4278
2017-03-13 23:53:00	28.5139		2018-07-02	31.2507
2017-03-14 23:53:00	31.4875		2018-07-03	33.6049
2017-03-15 23:53:00	32.9306		2018-07-04	34.0264
2017-03-16 23:53:00	32.6521		2018-07-05	34.3201
2017-03-17 23:53:00	30.7007		2018-07-06	33.5688
2017-03-18 23:53:00	29.5736		2018-07-07	32.0514
2017-03-19 23:53:00	28.9757		2018-07-08	29.2396
2017-03-20 23:53:00	27.8132		2018-07-09	27.0069
2017-03-21 23:53:00	24.2778		2018-07-10	32.1132
2017-03-22 23:53:00	26.0271		2018-07-11	44.6389
2017-03-23 23:53:00	25.6562		2018-07-12	53.2347
2017-03-24 23:53:00	25.1604		2018-07-13	53.166
2017-03-25 23:53:00	24.5181		2018-07-14	54.0035
2017-03-26 23:53:00	24.4271		2018-07-15	49.3618
2017-03-27 23:53:00	23.2674		2018-07-16	49.0264
2017-03-28 23:53:00	22.2528		2018-07-17	51.8937
2017-03-29 23:53:00	20.2361		2018-07-18	53.0194
2017-03-30 23:53:00	19.066		2018-07-19	51.534
2017-03-31 23:53:00	18.0521		2018-07-20	49.4194
2017-04-01 23:53:00	17.3951		2018-07-21	47.0569
2017-04-02 23:53:00	16.9639		2018-07-22	42.7333
2017-04-03 23:53:00	16.5528		2018-07-23	40.5722
2017-04-04 23:53:00	16.3778		2018-07-24	39.4181
2017-04-05 23:53:00	20.3868		2018-07-25	37.3618
2017-04-06 23:53:00	28.9236		2018-07-26	35.6167
2017-04-07 23:53:00	32.9028		2018-07-27	32.6028
2017-04-08 23:53:00	35.2153		2018-07-28	30.9111
2017-04-09 23:53:00	38.7396		2018-07-29	29.6896
2017-04-10 23:53:00	39.1125		2018-07-30	30.191
2017-04-11 10:23:00	37.0429		2018-07-31	30.2896
2017-04-12 23:53:00	NAN		2018-08-01	29.8813
2017-04-13 23:53:00	NAN		2018-08-02	30.1889
2017-04-14 23:53:00	NAN		2018-08-03	29.0153
2017-04-15 23:53:00	NAN		2018-08-04	27.9979
2017-04-16 23:53:00	NAN		2018-08-05	26.6549
2017-04-17 23:53:00	NAN		2018-08-06	25.0653
2017-04-18 23:53:00	NAN		2018-08-07	24.7299
2017-04-19 23:53:00	NAN		2018-08-08	24.2903
2017-04-20 23:53:00	36.4137		2018-08-09	24.8951
2017-04-21 23:53:00	36.3819		2018-08-10	25.2299
2017-04-22 23:53:00	35.3229		2018-08-11	24.9479
2017-04-23 23:53:00	33.2604		2018-08-12	24.0361
2017-04-24 23:53:00	31.1097		2018-08-13	22.3444
2017-04-25 23:53:00	30.7931		2018-08-14	19.3458
2017-04-26 23:53:00	30.666		2018-08-15	21.3285
2017-04-27 23:53:00	30.4028		2018-08-16	23.8472
2017-04-28 23:53:00	29.8451		2018-08-17	24.9674
2017-04-29 23:53:00	29.1299		2018-08-18	27.8722
2017-04-30 23:53:00	28.4493		2018-08-19	30.0806
2017-05-01 23:53:00	29.4882		2018-08-20	29.6917
2017-05-02 23:53:00	29.1104		2018-08-21	27.9694
2017-05-03 23:53:00	26.8229		2018-08-22	30.5264
2017-05-04 23:53:00	25.7118		2018-08-23	36.3646
2017-05-05 23:53:00	24.5062		2018-08-24	37.8764
2017-05-06 23:53:00	23.5521		2018-08-25	35.4986
2017-05-07 23:53:00	22.9604		2018-08-26	35.75
2017-05-08 23:53:00	22.2562		2018-08-27	35.634
2017-05-09 23:53:00	20.8458		2018-08-28	33.3042
2017-05-10 23:53:00	19.1604		2018-08-29	30.2778
2017-05-11 23:53:00	18.2958		2018-08-30	28.8
2017-05-12 23:53:00	18.7438		2018-08-31	27.3896
2017-05-13 23:53:00	26.3104		2018-09-01	26.8903
2017-05-14 23:53:00	37.166		2018-09-02	26.2292
2017-05-15 23:53:00	45.1271		2018-09-03	28.5132
2017-05-16 23:53:00	44.1625		2018-09-04	29.7389
2017-05-17 23:53:00	39.6667		2018-09-05	28.8347
2017-05-18 23:53:00	35.6826		2018-09-06	28.1847
2017-05-19 23:53:00	38.6868		2018-09-07	27.6382
2017-05-20 23:53:00	38.25		2018-09-08	26.5264
2017-05-21 23:53:00	40.5993		2018-09-09	25.0646
2017-05-22 23:53:00	39.8215		2018-09-10	23.5583
2017-05-23 23:53:00	37.8833		2018-09-11	23.0396
2017-05-24 23:53:00	35.4931		2018-09-12	22.4292
2017-05-25 23:53:00	34.2125		2018-09-13	23.4688
2017-05-26 23:53:00	33.8778		2018-09-14	23.3278
2017-05-27 23:53:00	34.1882		2018-09-15	23.5347
2017-05-28 23:53:00	36.6736		2018-09-16	23.1285
2017-05-29 23:53:00	39.8062		2018-09-17	22.3028
2017-05-30 23:53:00	41.6021		2018-09-18	21.6354
2017-05-31 23:53:00	40.9861		2018-09-19	20.4465
2017-06-01 23:35:00	37.1118		2018-09-20	18.2375
2017-06-02 23:35:00	36.7958		2018-09-21	15.8083
2017-06-03 23:35:00	35.6535		2018-09-22	13.7194
2017-06-04 23:35:00	35.0264		2018-09-23	12.3354
2017-06-05 23:35:00	34.7319		2018-09-24	10.9646
2017-06-06 23:35:00	34.4257		2018-09-25	10.2771
2017-06-07 23:35:00	34.1271		2018-09-26	9.94028
2017-06-08 23:35:00	33.5201		2018-09-27	9.56914
2017-06-09 23:35:00	33.0389
2017-06-10 23:35:00	31.6097
2017-06-11 23:35:00	29.0806
2017-06-12 23:35:00	27.5576
2017-06-13 23:35:00	26.4715
2017-06-14 23:35:00	25.3299
2017-06-15 23:35:00	NAN
2017-06-16 23:35:00	NAN
2017-06-17 23:35:00	NAN
2017-06-18 23:35:00	NAN
2017-06-19 23:35:00	NAN
2017-06-20 23:35:00	NAN
2017-06-21 23:35:00	NAN
2017-06-22 23:35:00	NAN
2017-06-23 23:35:00	15.0236
2017-06-24 23:35:00	NAN
2017-06-25 23:35:00	NAN
2017-06-26 23:35:00	NAN
2017-06-27 23:35:00	NAN
2017-06-28 23:35:00	NAN
2017-06-29 23:35:00	NAN
2017-06-30 23:35:00	NAN
2017-07-01 23:35:00	NAN
2017-07-02 23:35:00	17.8014
2017-07-03 23:35:00	34.9264
2017-07-04 23:35:00	NAN
2017-07-05 23:35:00	NAN
2017-10-04 23:31:00	31.6157
2017-10-05 23:31:00	31.2507
2017-10-06 23:31:00	30.8222
2017-10-07 23:31:00	30.2569
2017-10-08 23:31:00	29.0285
2017-10-09 23:31:00	28.7486
2017-10-10 23:31:00	32.1368
2017-10-11 23:31:00	34.1292
2017-10-12 23:31:00	35.3187
2017-10-13 23:31:00	34.5868
2017-10-14 23:31:00	34.475
2017-10-15 23:31:00	33.4042
2017-10-16 23:31:00	31.9514
2017-10-17 23:31:00	31.2056
2017-10-18 23:31:00	30.3486
2017-10-19 23:31:00	30.1396
2017-10-20 23:31:00	29.0042
2017-10-21 23:31:00	27.5701
2017-10-22 23:31:00	27.0458
2017-10-23 23:31:00	26.5201
2017-10-24 23:31:00	26.0257
2017-10-25 23:31:00	25.7819
2017-10-26 23:31:00	25.3069
2017-10-27 23:31:00	24.0583
2017-10-28 23:31:00	22.2931
2017-10-29 23:31:00	21.2944
2017-10-30 23:31:00	20.4944
2017-10-31 23:31:00	19.8111
2017-11-01 23:31:00	19.4569
2017-11-02 23:31:00	19.259
2017-11-03 23:31:00	18.8611
2017-11-04 23:31:00	18.8597
2017-11-05 23:31:00	19.4625
2017-11-06 23:31:00	20.6125
2017-11-07 23:31:00	21.9771
2017-11-08 23:31:00	22.9389
2017-11-09 23:31:00	23.8903
2017-11-10 23:31:00	23.8667
2017-11-11 23:31:00	23.8354
2017-11-12 23:31:00	25.5951
2017-11-13 23:31:00	26.1
2017-11-14 23:31:00	25.6
2017-11-15 23:31:00	25.2104
2017-11-16 23:31:00	24.9924
2017-11-17 23:31:00	23.9722
2017-11-18 23:31:00	23.7896
2017-11-19 23:31:00	23.4993
2017-11-20 23:31:00	23.5521
2017-11-21 23:31:00	23.2576
2017-11-22 23:31:00	22.1028
2017-11-23 23:31:00	21.0917
2017-11-24 23:31:00	18.9701
2017-11-25 23:31:00	19.5236
2017-11-26 23:31:00	19.2556
2017-11-27 23:31:00	18.9583
2017-11-28 23:31:00	16.5687
2017-11-29 23:31:00	17.6132
2017-11-30 23:31:00	17.4972
2017-12-01 23:31:00	17.9542
2017-12-02 23:31:00	17.4132
2017-12-03 23:31:00	16.3785
2017-12-04 23:31:00	15.6701
2017-12-05 23:31:00	15.059
2017-12-06 23:31:00	14.5868
2017-12-07 23:31:00	14.0701
2017-12-08 23:31:00	13.6931
2017-12-09 23:31:00	13.4215
2017-12-10 23:31:00	12.7708
2017-12-11 23:31:00	12.1938
2017-12-12 23:31:00	9.78889
2017-12-13 23:31:00	10.9188
2017-12-14 23:31:00	10.5521
2017-12-15 23:31:00	10.4132
2017-12-16 23:31:00	10.3243
2017-12-17 23:31:00	9.83889
2017-12-18 23:31:00	9.19792
2017-12-19 23:31:00	8.95556
2017-12-20 23:31:00	8.60625
2017-12-21 23:31:00	8.53958
2017-12-22 23:31:00	8.32292
2017-12-23 23:31:00	8.28264
2017-12-24 23:31:00	8.10069
2017-12-25 23:31:00	7.81111
2017-12-26 23:31:00	7.52361
2017-12-27 23:31:00	7.35069
2017-12-28 23:31:00	7.33264
2017-12-29 23:31:00	7.16319
2017-12-30 23:31:00	6.95694
2017-12-31 23:31:00	6.82431
2018-01-01 23:31:00	6.70903
2018-01-02 23:31:00	6.64306
2018-01-03 23:31:00	6.48264
2018-01-04 23:31:00	6.42917
2018-01-05 23:31:00	6.56458
2018-01-06 23:31:00	12.6153
2018-01-07 23:31:00	23.4313
2018-01-08 23:31:00	27.9688
2018-01-09 23:31:00	31.0958
2018-01-10 23:31:00	31.3278
2018-01-11 23:31:00	28.7972
2018-01-12 23:31:00	31.1076
2018-01-13 23:31:00	31.3826
2018-01-14 23:31:00	31.5722
2018-01-15 23:31:00	31.7486
2018-01-16 23:31:00	31.891
2018-01-17 23:31:00	30.9736
2018-01-18 23:31:00	28.5229
2018-01-19 21:01:00	26.9767

## Sheet: Table_Fig.7,8,9
Drip site	Date	d18O (permil VSMOW)	1SD	dD (permil VSMOW)	1SD	d17O (permil VSMOW)	1SD	17Oexcess	1SD	SE	d excess	1SD	SE
WP-1-1	2016-09-16	-5.67712	0.0337224	-31.3802	0.413779	NAN	NAN	NAN	NAN	NAN	14	NAN	NAN
WP-1-1	2016-09-26	-5.6367	0.0519833	-31.5741	0.237352	NAN	NAN	NAN	NAN	NAN	13.5	NAN	NAN
WP-1-1	2016-10-18	-5.49666	0.0479695	-30.4951	0.396447	NAN	NAN	NAN	NAN	NAN	13.4783	NAN	NAN
WP-1-1	2016-11-16	-5.74926	0.113088	-32.6862	0.588011	NAN	NAN	NAN	NAN	NAN	13.3079	NAN	NAN
WP-1-1	2016-11-29	-5.62986	0.0334106	-30.7914	0.520992	NAN	NAN	NAN	NAN	NAN	14.2475	NAN	NAN
WP-1-1	2016-12-15	-5.50436	0.0333507	-30.4012	0.452673	NAN	NAN	NAN	NAN	NAN	13.6337	NAN	NAN
WP-1-1	2017-01-17	-5.67739	0.051082	-32.1647	0.332776	NAN	NAN	NAN	NAN	NAN	13.2544	NAN	NAN
WP-1-1	2017-02-09	-5.85247	0.112929	-31.8816	0.0973374	NAN	NAN	NAN	NAN	NAN	14.9382	NAN	NAN
WP-1-1	2017-03-21	-5.61743	0.0303425	-30.8128	0.0466793	NAN	NAN	NAN	NAN	NAN	14.1267	NAN	NAN
WP-1-1	2017-04-11	-5.6624	0.0257275	-31.0635	0.0786923	NAN	NAN	NAN	NAN	NAN	14.2356	NAN	NAN
WP-1-1	2017-04-20	-5.62097	0.0268195	-30.8686	0.0237547	-2.94727	0.0266315	24.627	14.9324	5.6439	14.1505	0.174545	0.065972
WP-1-1	2017-06-01	-5.56621	0.0170378	-30.7661	0.0407816	NAN	NAN	NAN	NAN	NAN	13.7636	NAN	NAN
WP-1-1	2017-07-05	-5.65816	0.0139096	-30.7864	0.0470582	NAN	NAN	NAN	NAN	NAN	14.4792	NAN	NAN
WP-1-1	2017-09-26	-5.60719	0.0368439	-30.4751	0.168211	-2.93578	0.0221617	28.8272	10.2656	3.88002	14.3824	0.157861	0.0596657
WP-1-1	2017-10-04	-5.69239	0.0283608	-30.9866	0.0953794	-2.98221	0.0256868	27.5051	14.9745	5.65981	14.5525	0.207065	0.0782633
WP-1-1	2017-11-24	-5.48332	0.0331203	-29.8678	0.20257	-2.88569	0.0326927	13.3019	19.4388	7.34718	13.9987	0.227718	0.0860695
WP-1-1	2017-11-28	-5.6238	0.0310238	-30.5657	0.0747749	-2.94837	0.0270766	25.0249	12.2863	4.64379	14.4247	0.260945	0.098628
WP-1-1	2017-12-12	-5.6096	0.0256895	-30.604	0.168017	-2.94543	0.0253076	20.4295	16.9833	6.41908	14.2728	0.170211	0.0643339
WP-1-1	2018-01-11	-5.54864	0.0455814	-30.2574	0.228734	-2.89118	0.0263872	42.4723	14.9496	5.65041	14.1317	0.258779	0.0978093
WP-1-1	2018-02-07	-5.62273	0.0253208	-30.5414	0.0498522	-2.9478	0.0355709	25.0236	25.0227	9.45769	14.4405	0.204175	0.0771709
WP-1-1	2018-03-23	-5.5888	0.0313202	-30.0847	0.138959	-2.92326	0.0265447	31.6232	11.2242	4.24235	14.6257	0.144616	0.0546597
WP-1-1	2018-05-16	-5.50229	0.0130092	-30.175	0.0747459	-2.86654	0.0246557	42.5732	19.0375	7.19548	13.8433	0.143824	0.0543604
WP-1-1	2018-09-27	-5.55517	0.0345998	-29.6886	0.209188	-2.90514	0.017596	31.9391	6.02951	2.27894	14.7527	0.165547	0.0625708
WP-1-1	2018-11-08	-5.42249	0.0234582	-29.1589	0.0637704	-2.83874	0.0219534	28.0861	11.7813	4.45292	14.221	0.142791	0.0539701
WP-1-1	2018-12-18	-5.5131	0.0275309	-29.9645	0.228678	-2.88622	0.0256106	28.5772	13.1196	4.95874	14.1403	0.197022	0.0744672
WP-1-1	2019-01-03	-5.57113	0.018452	-30.05	0.0944959	-2.92874	0.0219957	16.7437	13.1165	4.95757	14.519	0.172541	0.0652143
WP-1-1	2019-01-17	-5.53344	0.12948	-29.7488	0.476983	-2.91016	0.0753765	15.3639	17.3375	6.55294	14.5187	0.561491	0.212224
WP-1-2	2016-09-16	-5.44328	0.0669052	-28.8009	0.285882	NAN	NAN	NAN	NAN	NAN	14.7	NAN	NAN
WP-1-2	2016-09-26	-5.36194	0.0524773	-30.8746	0.107218	NAN	NAN	NAN	NAN	NAN	12	NAN	NAN
WP-1-2	2016-10-18	-5.58529	0.0341433	-31.232	0.3518	NAN	NAN	NAN	NAN	NAN	13.4503	NAN	NAN
WP-1-2	2016-11-16	-5.74572	0.0464532	-32.0336	0.323768	NAN	NAN	NAN	NAN	NAN	13.9322	NAN	NAN
WP-1-2	2016-11-29	-5.72928	0.0401281	-31.0094	0.296189	NAN	NAN	NAN	NAN	NAN	14.8248	NAN	NAN
WP-1-2	2016-12-15	-5.6433	0.0401734	-30.9995	0.258574	NAN	NAN	NAN	NAN	NAN	14.1469	NAN	NAN
WP-1-2	2017-01-17	-5.53121	0.0396102	-30.2577	0.504205	NAN	NAN	NAN	NAN	NAN	13.9919	NAN	NAN
WP-1-2	2017-02-09	-5.58185	0.0671883	-31.8806	0.445455	NAN	NAN	NAN	NAN	NAN	12.7742	NAN	NAN
WP-1-2	2017-03-21	-5.58437	0.0197122	-30.9805	0.215509	NAN	NAN	NAN	NAN	NAN	13.6945	NAN	NAN
WP-1-2	2017-04-11	-5.64177	0.0290853	-30.9007	0.0541246	NAN	NAN	NAN	NAN	NAN	14.2335	NAN	NAN
WP-1-2	2017-04-20	-5.63365	0.0281112	-30.9434	0.0442224	NAN	NAN	NAN	NAN	NAN	14.149	NAN	NAN
WP-1-2	2017-07-05	-5.60601	0.024805	-30.8332	0.0447538	NAN	NAN	NAN	NAN	NAN	14.0317	NAN	NAN
WP-1-2	2017-09-26	-5.66552	0.0310453	-30.843	0.0950489	-2.9784	0.0358701	17.0548	21.2148	8.01844	14.4812	0.264512	0.0999762
WP-1-2	2017-10-04	-5.73199	0.0306749	-31.3215	0.126562	-3.01156	0.0313202	19.0935	17.5856	6.64673	14.5344	0.223101	0.0843242
WP-1-2	2017-11-24	-5.66428	0.024589	-30.569	0.0721912	-2.98237	0.0214543	12.4206	12.614	4.76765	14.7453	0.160704	0.0607403
WP-1-2	2017-11-28	-5.62025	0.0330642	-30.5704	0.109841	-2.93983	0.0212166	31.6994	16.9327	6.39998	14.3916	0.218986	0.082769
WP-1-2	2017-12-12	-5.64582	0.0204613	-30.6202	0.139958	-2.95816	0.029385	26.8924	21.5392	8.14106	14.5464	0.230254	0.0870277
WP-1-2	2018-01-11	-5.61594	0.0347946	-30.5926	0.0564468	-2.94348	0.0447714	25.7558	27.0009	10.2054	14.3349	0.228308	0.0862921											1
WP-1-2	2018-02-07	-5.63291	0.0105898	-30.7582	0.186406	-2.9524	0.0163474	25.8135	16.3547	6.18148	14.305	0.154885	0.0585409
WP-1-2	2018-03-23	-5.61721	0.0203036	-30.4256	0.130034	-2.94515	0.0260795	24.7534	16.8175	6.3564	14.5121	0.169964	0.0642404
WP-1-2	2018-05-16	-5.55207	0.0409052	-30.4085	0.164953	-2.89104	0.0243975	44.4401	12.5945	4.76027	14.0081	0.189652	0.0716819
WP-1-2	2018-09-27	-5.52	0.05	-29.77	0.29	-2.89	0.03	29	10	4	14.4	0.2	0.1
WP-1-2	2018-11-08	-5.49105	0.0602961	-29.7606	0.20869	-2.87934	0.0307184	23.7728	12.6591	4.78469	14.1678	0.294217	0.111204
WP-1-2	2018-12-18	-5.52718	0.0791575	-30.0325	0.218717	-2.88993	0.0392252	32.3284	9	4	14.1849	0.413512	0.156293
WP-1-2	2019-01-03	-5.54681	0.0258512	-30.0083	0.115525	-2.91058	0.0154919	22.0475	7.40222	2.79778	14.3662	0.146365	0.0553206
WP-1-2	2019-01-17	-5.52007	0.0395721	-30.043	0.0768015	-2.89833	0.0249981	20.1328	12.703	4.80128	14.1176	0.271743	0.102709
WP-1-3	2016-09-16	-5.56097	0.0525776	-29.8529	0.270173	NAN	NAN	NAN	NAN	NAN	14.6348	NAN	NAN
WP-1-3	2016-09-26	-5.71453	0.0501308	-29.9568	0.383126	NAN	NAN	NAN	NAN	NAN	15.7594	NAN	NAN
WP-1-3	2016-10-18	-5.56448	0.0456235	-31.2858	0.251373	NAN	NAN	NAN	NAN	NAN	13.23	NAN	NAN
WP-1-3	2016-11-16	-5.67557	0.0607179	-31.3174	0.277649	NAN	NAN	NAN	NAN	NAN	14.0872	NAN	NAN
WP-1-3	2016-11-29	-5.63055	0.0471749	-30.3331	0.415813	NAN	NAN	NAN	NAN	NAN	14.7114	NAN	NAN
WP-1-3	2016-12-15	-5.61185	0.0463397	-31.0098	0.384679	NAN	NAN	NAN	NAN	NAN	13.885	NAN	NAN
WP-1-3	2017-01-17	-5.59289	0.0415772	-30.7255	0.285083	NAN	NAN	NAN	NAN	NAN	14.0176	NAN	NAN
WP-1-3	2017-02-09	-5.64574	0.0378928	-32.5359	0.376813	NAN	NAN	NAN	NAN	NAN	12.63	NAN	NAN
WP-1-3	2017-03-21	-5.6302	0.0106838	-30.9285	0.0822181	NAN	NAN	NAN	NAN	NAN	14.1131	NAN	NAN
WP-1-3	2017-04-11	-5.6429	0.0208635	-30.8339	0.050603	NAN	NAN	NAN	NAN	NAN	14.3093	NAN	NAN
WP-1-3	2017-04-20	-5.63864	0.0137564	-30.944	0.0362281	NAN	NAN	NAN	NAN	NAN	14.1998	NAN	NAN
WP-1-3	2017-06-01	-5.5384	0.0168805	-30.8072	0.0464881	NAN	NAN	NAN	NAN	NAN	13.5	NAN	NAN
WP-1-3	2017-07-05	-5.65787	0.0229917	-31.0354	0.0372936	NAN	NAN	NAN	NAN	NAN	14.1937	NAN	NAN
WP-1-3	2017-09-26	-5.6355	0.0249227	-30.9104	0.0979213	-2.94397	0.0377422	35.6476	27.6673	10.4573	14.1736	0.264786	0.10008
WP-1-3	2017-10-04	-5.6801	0.0190763	-30.9888	0.0725154	-2.9688	0.0206213	34.4224	11.6581	4.40634	14.452	0.133477	0.0504495
WP-1-3	2017-11-24	-5.66371	0.0161452	-30.737	0.12802	-2.96754	0.0258125	26.9939	20.1353	7.61041	14.5728	0.208516	0.0788118
WP-1-3	2017-11-28	-5.66329	0.0282657	-30.787	0.182187	-2.96376	0.0203048	30.5567	12.5065	4.72701	14.5193	0.122203	0.0461884
WP-1-3	2017-12-12	-5.66031	0.0374871	-30.6524	0.0997805	-2.97201	0.0283078	20.6933	9.74806	3.68442	14.63	0.244596	0.0924484
WP-1-3	2018-01-11	-5.6257	0.0214354	-30.6043	0.0722469	-2.94041	0.015748	34.0135	15.8242	5.98098	14.4013	0.160876	0.0608053
WP-1-3	2018-02-07	-5.62951	0.0229689	-30.6017	0.12314	-2.9524	0.0239494	24.0117	13.7529	5.19811	14.4344	0.207185	0.0783087
WP-1-3	2018-03-23	-5.61113	0.0254783	-30.287	0.0599039	-2.95101	0.0343968	15.6506	22.8118	8.62204	14.602	0.208615	0.0788492
WP-1-3	2018-05-16	-5.61452	0.0359696	-30.3932	0.167395	-2.93935	0.0264287	29.1456	10.1502	3.83641	14.523	0.150829	0.0570078
WP-1-3	2018-09-27	-5.57703	0.0580156	-29.9205	0.215445	-2.92918	0.0436763	19.437	15.3769	5.81192	14.6958	0.301267	0.113868
WP-1-3	2018-11-08	-5.54197	0.053876	-30.2409	0.185076	-2.8986	0.0305988	31.4873	10.3677	3.91861	14.0949	0.383376	0.144903
WP-1-3	2018-12-18	-5.53017	0.0463922	-30.0335	0.167513	-2.89076	0.0193809	33.0858	13.726	5.18795	14.2078	0.255285	0.0964886
WP-1-3	2019-01-03	-5.59503	0.0220411	-30.1542	0.138787	-2.94484	0.0291882	13.2837	20.435	7.7237	14.606	0.11684	0.0441615
WP-1-3	2019-01-17	-5.50812	0.0395047	-30.0816	0.0527094	-2.89585	0.0244043	16.2733	12.744	4.8168	13.9834	0.268059	0.101317
WP-1-4	2016-09-26	-5.68629	0.0561391	-31.619	0.232656	NAN	NAN	NAN	NAN	NAN	13.9	NAN	NAN
WP-1-4	2016-10-18	-5.46724	0.0327826	-30.8924	0.409723	NAN	NAN	NAN	NAN	NAN	12.8455	NAN	NAN
WP-1-4	2016-11-16	-5.83454	0.0799592	-32.1292	0.415018	NAN	NAN	NAN	NAN	NAN	14.5471	NAN	NAN
WP-1-4	2016-11-29	-5.70085	0.025818	-30.2531	0.332011	NAN	NAN	NAN	NAN	NAN	15.3537	NAN	NAN
WP-1-4	2016-12-15	-5.65337	0.0295206	-30.7716	0.381877	NAN	NAN	NAN	NAN	NAN	14.4554	NAN	NAN
WP-1-4	2016-12-29	-5.70085	0.025818	-30.2531	0.332011	NAN	NAN	NAN	NAN	NAN	15.3537	NAN	NAN
WP-1-4	2017-01-17	-5.57255	0.0244111	-30.1171	0.389913	NAN	NAN	NAN	NAN	NAN	14.4634	NAN	NAN
WP-1-4	2017-02-09	-5.61406	0.0395091	-31.5623	0.365957	NAN	NAN	NAN	NAN	NAN	13.3501	NAN	NAN
WP-1-4	2017-03-21	-5.50151	0.0284998	-30.2671	0.0701556	NAN	NAN	NAN	NAN	NAN	13.7449	NAN	NAN
WP-1-4	2017-04-11	-5.65463	0.0240198	-30.822	0.132888	NAN	NAN	NAN	NAN	NAN	14.4151	NAN	NAN
WP-1-4	2017-04-20	-5.64021	0.0193944	-30.8383	0.04226	NAN	NAN	NAN	NAN	NAN	14.3067	NAN	NAN
WP-1-4	2017-06-01	-5.47668	0.0205565	-30.3085	0.0710091	NAN	NAN	NAN	NAN	NAN	13.5049	NAN	NAN
WP-1-4	2017-07-05	-5.62083	0.0198734	-30.5528	0.0487046	NAN	NAN	NAN	NAN	NAN	14.4012	NAN	NAN
WP-1-4	2017-09-26	-5.71341	0.0144222	-30.7784	0.0649403	-3.0007	0.0200238	20.123	13.4538	5.08507	14.9288	0.144249	0.054521
WP-1-4	2017-10-04	-5.72184	0.0202884	-30.9455	0.129309	-3.00197	0.0153452	23.3283	6.24166	2.35913	14.8292	0.152441	0.0576172
WP-1-4	2017-11-24	-5.67309	0.0288551	-30.7316	0.187474	-2.98628	0.0203458	13.1677	9.77592	3.69495	14.6531	0.122311	0.0462291
WP-1-4	2017-11-28	-5.63147	0.0249523	-30.5598	0.0694235	-2.95872	0.0286639	18.7133	17.1312	6.47498	14.4919	0.174543	0.0659709
WP-1-4	2017-12-12	-5.6532	0.0311548	-30.5494	0.0750454	-2.96977	0.0295167	19.1672	15.508	5.86148	14.6763	0.253772	0.095917
WP-1-4	2018-02-07	-5.63333	0.0321136	-30.5126	0.0683882	-2.94682	0.0316642	31.6334	17.4421	6.59248	14.5541	0.222633	0.0841472
WP-1-4	2018-03-23	-5.58342	0.0226306	-30.2225	0.137476	-2.91084	0.0264809	41.2184	15.7519	5.95367	14.4449	0.23593	0.0891731
WP-1-4	2018-05-16	-5.64903	0.0423354	-30.4951	0.20035	-2.94732	0.0187782	39.4763	13.2736	5.01695	14.6971	0.195822	0.0740138
WP-1-4	2018-09-27	-5.57093	0.0402057	-29.5783	0.420565	-2.91709	0.0243516	28.3205	15.6926	7.01793	14.8283	0.281876	0.126059
WP-1-4	2018-11-08	-5.46374	0.0158902	-29.4703	0.0791107	-2.85894	0.0125817	29.7261	8.60396	3.84781	14.2396	0.0905413	0.0404913
WP-1-4	2018-12-18	-5.51978	0.0441841	-29.9764	0.149789	-2.88415	0.0289647	34.1971	14.5438	5.49703	14.1819	0.276513	0.104512
WP-1-4	2019-01-17	-5.51623	0.0217617	-30.0434	0.0308699	-2.8909	0.0234084	25.5462	14.0614	5.3147	14.0864	0.175694	0.066406
WP-1A	2016-10-18	-5.62112	0.0553296	-31.183	0.41376	NAN	NAN	NAN	NAN	NAN	13.7859	NAN	NAN
WP-1A	2016-11-16	-5.73832	0.054309	-32.1226	0.608892	NAN	NAN	NAN	NAN	NAN	13.784	NAN	NAN
WP-1A	2016-12-15	-5.54488	0.042908	-30.8512	0.356441	NAN	NAN	NAN	NAN	NAN	13.5078	NAN	NAN
WP-1A	2017-01-17	-5.6397	0.0312794	-30.7643	0.326662	NAN	NAN	NAN	NAN	NAN	14.3533	NAN	NAN
WP-1A	2017-02-09	-5.58922	0.0345466	-32.3263	0.244864	NAN	NAN	NAN	NAN	NAN	12.3874	NAN	NAN
WP-1A	2017-03-21	-5.58182	0.0265294	-30.7047	0.0949471	NAN	NAN	NAN	NAN	NAN	13.9499	NAN	NAN
WP-1A	2017-04-11	-5.70025	0.0140932	-30.8485	0.0610242	NAN	NAN	NAN	NAN	NAN	14.7535	NAN	NAN
WP-1A	2017-04-20	-5.56734	0.0366807	-30.6964	0.139231	NAN	NAN	NAN	NAN	NAN	13.8423	NAN	NAN
WP-1A	2017-06-01	-5.38516	0.0155288	-30.2988	0.0395505	NAN	NAN	NAN	NAN	NAN	12.7825	NAN	NAN
WP-1A	2017-07-05	-5.65816	0.0275283	-30.9559	0.0657875	NAN	NAN	NAN	NAN	NAN	14.2978	NAN	NAN
WP-1A	2017-10-04	-5.66737	0.0281662	-30.9453	0.0382573	-2.9633	0.0299428	33.186	15.7267	5.94412	14.3937	0.244235	0.0923122
WP-1A	2018-02-07	-5.62315	0.0295167	-30.3743	0.0645309	-2.95045	0.0335048	22.5914	18.8369	7.11969	14.6109	0.207573	0.0784552
WP-1B	2016-10-18	-5.49453	0.0967376	-31.3625	0.427934	NAN	NAN	NAN	NAN	NAN	12.5938	NAN	NAN
WP-1B	2016-11-16	-5.61634	0.0639356	-31.8374	0.433731	NAN	NAN	NAN	NAN	NAN	13.0933	NAN	NAN
WP-1B	2016-12-15	-5.65815	0.0380579	-31.0689	0.416005	NAN	NAN	NAN	NAN	NAN	14.1963	NAN	NAN
WP-1B	2017-01-17	-5.56128	0.0301579	-31.1916	0.283821	NAN	NAN	NAN	NAN	NAN	13.2986	NAN	NAN
WP-1B	2017-02-09	-5.61507	0.0395647	-31.6079	0.339683	NAN	NAN	NAN	NAN	NAN	13.3127	NAN	NAN
WP-1B	2017-03-21	-5.52676	0.0231064	-30.5262	0.073799	NAN	NAN	NAN	NAN	NAN	13.6879	NAN	NAN
WP-1B	2017-04-11	-5.67002	0.0254951	-30.877	0.0437966	NAN	NAN	NAN	NAN	NAN	14.4832	NAN	NAN
WP-1B	2017-04-20	-5.60689	0.0238148	-30.9354	0.0432044	NAN	NAN	NAN	NAN	NAN	13.9197	NAN	NAN
WP-1B	2017-06-01	-5.52237	0.0176985	-30.6849	0.0497743	NAN	NAN	NAN	NAN	NAN	13.494	NAN	NAN
WP-1B	2017-07-05	-5.59105	0.0376247	-30.4545	0.240349	NAN	NAN	NAN	NAN	NAN	14.2822	NAN	NAN
WP-1B	2017-10-04	-5.68038	0.0292233	-30.8636	0.159086	-2.97346	0.0235372	29.9037	14.8158	5.59983	14.5795	0.172936	0.0653636
WP-1B	2018-02-07	-5.63941	0.0206778	-30.3776	0.158599	-2.95505	0.0172723	26.6094	11.4317	4.32078	14.7377	0.17149	0.0648173
WP-2	2016-09-16	-5.62923	0.0328573	-30.8713	0.334435	NAN	NAN	NAN	NAN	NAN	14.2	NAN	NAN
WP-2	2016-09-26	-5.46434	0.0621399	-29.7938	0.460459	NAN	NAN	NAN	NAN	NAN	13.9	NAN	NAN
WP-2	2016-10-18	-5.37801	0.0271711	-29.5588	0.298439	NAN	NAN	NAN	NAN	NAN	13.4653	NAN	NAN
WP-2	2016-11-16	-5.40835	0.0839891	-28.6363	0.200165	NAN	NAN	NAN	NAN	NAN	14.6305	NAN	NAN
WP-2	2017-02-09	-5.20546	0.07883	-29.8816	0.45795	NAN	NAN	NAN	NAN	NAN	11.7621	NAN	NAN
WP-2	2017-03-21	-5.31819	0.0187502	-29.1263	0.0607164	NAN	NAN	NAN	NAN	NAN	13.4192	NAN	NAN
WP-2	2017-04-11	-5.53937	0.0219805	-30.2462	0.113846	NAN	NAN	NAN	NAN	NAN	14.0688	NAN	NAN
WP-2	2017-04-20	-5.5296	0.0339355	-30.1443	0.199104	NAN	NAN	NAN	NAN	NAN	14.0926	NAN	NAN
WP-2	2017-06-01	-5.57132	0.0249189	-30.7543	0.0333488	NAN	NAN	NAN	NAN	NAN	13.8162	NAN	NAN
WP-2	2017-07-05	-5.65745	0.0191697	-31.1807	0.0244745	NAN	NAN	NAN	NAN	NAN	14.0616	NAN	NAN
WP-2	2017-09-26	-5.65051	0.0341293	-30.9819	0.161691	-2.96782	0.0266815	19.6996	16.3617	6.18415	14.2221	0.208779	0.078911
WP-2	2017-10-04	-5.63121	0.0313604	-30.7403	0.164509	-2.94256	0.0243154	34.7861	16.9475	6.40557	14.3094	0.188738	0.0713363
WP-2	2017-11-24	-5.63076	0.046204	-30.5161	0.164658	-2.95117	0.0309554	25.9142	10.7144	4.04965	14.53	0.282034	0.106599
WP-2	2017-11-28	-5.60647	0.0312989	-30.4773	0.201823	-2.95187	0.0304295	12.3151	14.2596	5.38964	14.3745	0.177549	0.0671071
WP-2	2017-12-12	-5.49895	0.0301093	-30.1007	0.147975	-2.88848	0.0338611	18.7908	21.4834	8.11996	13.8909	0.273898	0.103524
WP-2	2018-02-07	-5.60915	0.0220108	-30.5273	0.0311846	-2.94166	0.0261898	23.971	16.5762	6.2652	14.346	0.187693	0.0709412
WP-2	2018-03-23	-5.54539	0.0249447	-30.1238	0.0955438	-2.92507	0.0320193	6.75835	20.5605	7.77114	14.2393	0.257811	0.0974436
WP-2	2018-05-16	-5.56922	0.0208624	-30.2572	0.0682618	-2.92478	0.0218785	19.6994	15.3899	5.81682	14.2966	0.151946	0.0574303
WP-2	2018-09-27	-5.42024	0.0292797	-29.8105	0.230781	-2.82996	0.0183385	35.6973	8.85606	3.96055	13.5514	0.110751	0.0452137
WP-2	2018-12-18	-5.4983	0.0181725	-30.0083	0.0355193	-2.88333	0.0119682	23.6215	9.72007	3.67384	13.9782	0.178882	0.0676112
WP-2	2019-01-03	-5.62846	0.0591829	-30.9506	0.332269	-2.9542	0.0360634	21.6478	13.4854	5.09702	14.077	0.198589	0.0750596
WP-2	2019-01-17	-5.57725	0.0239722	-30.7097	0.066097	-2.9231	0.0185472	25.6501	9.40297	3.55399	13.9083	0.150213	0.0567752
WP-3	2016-09-16	-5.67848	0.0483018	-30.7084	0.259032	NAN	NAN	NAN	NAN	NAN	14.7194	NAN	NAN
WP-3	2016-09-26	-5.55396	0.0554425	-28.7864	0.228661	NAN	NAN	NAN	NAN	NAN	15.6453	NAN	NAN
WP-3	2016-10-18	-5.29408	0.0584488	-29.024	0.431611	NAN	NAN	NAN	NAN	NAN	13.3286	NAN	NAN
WP-3	2016-11-16	-5.60031	0.0531617	-30.4857	0.426484	NAN	NAN	NAN	NAN	NAN	14.3168	NAN	NAN
WP-3	2016-12-15	-5.39658	0.0420543	-29.5338	0.327604	NAN	NAN	NAN	NAN	NAN	13.6388	NAN	NAN
WP-3	2017-02-09	-5.28327	0.0395006	-30.4535	0.204106	NAN	NAN	NAN	NAN	NAN	11.8127	NAN	NAN
WP-3	2017-03-21	-5.34487	0.0200238	-29.0691	0.0442095	NAN	NAN	NAN	NAN	NAN	13.6898	NAN	NAN
WP-3	2017-04-11	-5.50477	0.034696	-29.8283	0.158858	NAN	NAN	NAN	NAN	NAN	14.2099	NAN	NAN
WP-3	2017-04-20	-5.50812	0.0191473	-30.0487	0.0750178	NAN	NAN	NAN	NAN	NAN	14.0369	NAN	NAN
WP-3	2017-06-01	-5.47356	0.021935	-30.1236	0.0566157	NAN	NAN	NAN	NAN	NAN	13.6648	NAN	NAN
WP-3	2017-07-05	-5.5124	0.0295337	-30.2843	0.0615216	NAN	NAN	NAN	NAN	NAN	13.7974	NAN	NAN
WP-3	2017-09-26	-5.66008	0.0141623	-30.4771	0.0921872	-2.96175	0.0249962	30.8714	19.9729	7.54906	14.8035	0.165969	0.0627305
WP-3	2017-10-04	-5.65508	0.0415601	-30.488	0.158653	-2.96457	0.0191311	25.3843	13.7689	5.20417	14.7526	0.19172	0.0724634
WP-3	2017-11-24	-5.6184	0.0151752	-30.1421	0.0899767	-2.94921	0.0186522	21.3169	11.3589	4.29326	14.8051	0.183249	0.0692615
WP-3	2017-11-28	-5.59923	0.0184158	-30.1815	0.129505	-2.94081	0.0153235	19.5547	13.086	4.94604	14.6123	0.19872	0.0751091
WP-3	2017-12-12	-5.60107	0.0286531	-30.3496	0.167938	-2.92976	0.0165371	31.621	3.60675	1.36322	14.459	0.181787	0.0687091
WP-3	2018-02-07	-5.59756	0.0252841	-30.1199	0.159484	-2.9439	0.0211255	15.5773	8.77095	3.31511	14.6606	0.235455	0.0889938
WP-3	2018-03-23	-5.53111	0.0305599	-29.6918	0.0960659	-2.91824	0.0333052	6.03	20.3655	7.69744	14.5571	0.210115	0.0794161
WP-3	2018-05-16	-5.48956	0.0349496	-29.6823	0.207698	-2.87326	0.0319315	29.0734	13.0242	4.92269	14.2342	0.193571	0.0731631
WP-3	2018-09-27	-5.52036	0.0255206	-29.5752	0.110126	-2.90242	0.0280482	16.1792	11.9275	6.35192	14.6296	0.141739	0.0633878
WP-3	2018-12-18	-5.46431	0.0117311	-29.5881	0.0318419	-2.86282	0.0136242	26.1362	9.12641	3.44946	14.1264	0.0894007	0.0337903
WP-3	2019-01-03	-5.52448	0.0365349	-30.0209	0.296321	-2.90865	0.0143666	12.1229	8.03449	3.28007	14.1749	0.175871	0.066473
WP-3	2019-01-17	-5.47526	0.0395131	-29.6779	0.0736607	-2.87961	0.0256478	15.1139	6.03387	2.28059	14.1242	0.253927	0.0959752
WP-4	2016-09-26	-5.30165	0.0356581	-30.2769	0.241231	NAN	NAN	NAN	NAN	NAN	12.1	NAN	NAN
WP-4	2016-11-16	-5.52012	0.0600114	-30.7664	0.336336	NAN	NAN	NAN	NAN	NAN	13.3945	NAN	NAN
WP-4	2016-12-15	-5.50934	0.0122706	-29.761	0.16019	NAN	NAN	NAN	NAN	NAN	14.3137	NAN	NAN
WP-4	2017-01-17	-5.4082	0.0600913	-28.8858	1.08291	NAN	NAN	NAN	NAN	NAN	14.3798	NAN	NAN
WP-4	2017-02-09	-5.5248	0.025121	-31.096	0.265852	NAN	NAN	NAN	NAN	NAN	13.1024	NAN	NAN
WP-4	2017-03-21	-5.4842	0.017677	-29.9859	0.0598995	NAN	NAN	NAN	NAN	NAN	13.8877	NAN	NAN
WP-4	2017-04-11	-5.57779	0.0236341	-30.4748	0.074679	NAN	NAN	NAN	NAN	NAN	14.1475	NAN	NAN
WP-4	2017-04-20	-5.5733	0.0267635	-30.4177	0.0272257	NAN	NAN	NAN	NAN	NAN	14.1688	NAN	NAN
WP-4	2017-06-01	-5.48704	0.021069	-30.4095	0.081077	NAN	NAN	NAN	NAN	NAN	13.4868	NAN	NAN
WP-4	2017-07-05	-5.61798	0.0202637	-30.739	0.13316	NAN	NAN	NAN	NAN	NAN	14.247	NAN	NAN
WP-4	2017-09-26	-5.61948	0.0235968	-30.412	0.135148	-2.94792	0.0187566	23.1835	12.5731	4.75218	14.5438	0.224211	0.0847439
WP-4	2017-10-04	-5.63993	0.0438895	-30.8884	0.167577	-2.94651	0.0443874	35.4533	21.2391	8.02762	14.231	0.280128	0.105878
WP-4	2017-11-24	-5.62465	0.027244	-30.4534	0.151483	-2.94907	0.0308699	24.7756	18.865	7.13028	14.5439	0.290905	0.109952
WP-4	2017-11-28	-5.56528	0.0303754	-30.064	0.100282	-2.91339	0.0274131	29.033	16.1516	6.10472	14.4582	0.223673	0.0845404
WP-4	2017-12-12	-5.54781	0.0242821	-30.0004	0.111716	-2.91521	0.0350999	17.9321	23.1691	8.75711	14.3821	0.245907	0.0929442
WP-4	2018-02-07	-5.55331	0.0299038	-30.032	0.109608	-2.91168	0.022999	24.3895	11.2065	4.23565	14.3945	0.146038	0.0551971
WP-4	2018-03-23	-5.53761	0.0353762	-29.9226	0.0621634	-2.89704	0.0370804	30.7424	19.6987	7.4454	14.3783	0.25208	0.0952773
WP-4	2018-05-16	-5.6202	0.0441847	-30.4083	0.296796	-2.94402	0.0248596	27.4769	15.3803	5.8132	14.5533	0.164811	0.0622926
WP-4	2018-09-27	-5.57348	0.0218392	-29.9463	0.177307	-2.92423	0.0138907	22.5125	13.1723	4.97865	14.6416	0.101755	0.0384598
WP-4	2018-12-18	-5.52177	0.0272134	-30.2201	0.215287	-2.89709	0.0307029	22.2808	20.8516	7.88116	13.9541	0.151594	0.0572971
WP-4	2019-01-03	-5.53045	0.0625486	-30.1258	0.25751	-2.91264	0.0357837	11.2925	10.1294	3.82857	14.1178	0.293689	0.111004
WP-4	2019-01-17	-5.50741	0.0235332	-30.0228	0.0455119	-2.88333	0.0196614	28.4548	15.4148	5.82624	14.0365	0.149168	0.05638
WP-FB	2017-11-28	-5.52252	0.0276043	-29.5735	0.0754999	-2.91157	0.0314097	8.15661	17.4301	6.58795	14.6067	0.216456	0.0818127
WP-FB	2018-02-07	-5.61311	0.0181882	-30.2241	0.0906605	-2.94139	0.0349142	26.3525	25.5028	9.63916	14.6808	0.165068	0.0623897
WP-FB	2018-03-23	-5.61	0.0234307	-30.2662	-30.2662	-2.9379	0.0217781	28.1979	12.6627	4.78604	14.6138	0.188374	0.0711985
WP-FB	2018-09-27	-5.42779	0.028	-28.4224	0.162959	-2.84483	0.0219729	24.8003	13.6921	5.17514	15	0.17429	0.0658753
WP-FB	2018-12-18	-5.4306	0.0284998	-29.3398	0.084942	-2.84466	0.0334607	26.4559	19.9434	7.53788	14.1049	0.233752	0.0883498
WP-FB	2019-01-03	-5.38992	0.00601189	-29.245	0.0439989	-2.83682	0.0135752	12.7258	10.2088	3.85858	13.8743	0.077544	0.0293089
WP- STREAM	2016-09-26	-5.23594	0.0357827	-27.6209	0.296486	NAN	NAN	NAN	NAN	NAN	14.27	NAN	NAN
WP- STREAM	2016-11-16	-5.11597	0.0652615	-26.9282	0.215568	NAN	NAN	NAN	NAN	NAN	13.9996	NAN	NAN
WP- STREAM	2016-12-15	-5.2247	0.0442241	-27.5865	0.581904	NAN	NAN	NAN	NAN	NAN	14.2112	NAN	NAN
WP- STREAM	2017-01-17	-5.00243	0.0638895	-26.0585	0.438816	NAN	NAN	NAN	NAN	NAN	13.9609	NAN	NAN
WP- STREAM	2017-04-11	-5.28838	0.0150444	-28.0313	0.115232	-2.76861	0.0253621	28.2271	18.1265	6.85117	14.2758	0.111927	0.0423046
WP- STREAM	2017-04-20	-5.29799	0.0199392	-28.0543	0.048949	-2.78151	0.0186279	19.3911	10.9404	4.13509	14.3296	0.182118	0.0688342
WP- STREAM	2017-06-01	-5.25491	0.0286356	-28.2434	0.205223	-2.74602	0.0301212	32.1098	20.047	7.57704	13.7959	0.146479	0.0553639
WP- STREAM	2017-07-05	-5.31078	0.018849	-28.0696	0.0728946	-2.78796	0.0144963	19.7094	8.11254	3.06625	14.3911	0.11477	0.0433789
WP- STREAM	26/9/2017	-5.32871	0.0189724	-27.9665	0.1276	-2.7965	0.0255044	20.6609	16.8279	6.36037	14.6632	0.179114	0.0676986
WP- STREAM	2017-04-10	-5.41091	0.0223138	-28.4139	0.113626	-2.83503	0.0210272	25.6641	12.5279	4.7351	14.8734	0.145755	0.0550902
WP- STREAM	24/11/17	-5.34597	0.0262543	-28.2164	0.187293	-2.79754	0.0343338	28.7804	20.7991	7.86133	14.5513	0.28411	0.107384
WP- STREAM	28/11/17	-5.30094	0.0179483	-27.43	0.200533	-2.77361	0.027766	28.8709	23.7359	8.97132	14.9775	0.205924	0.0778319
WP- STREAM	2017-12-12	-5.31869	0.0255082	-27.7408	0.164701	-2.79712	0.029091	14.7245	19.6716	7.43515	14.8087	0.16472	0.0622584
WP- STREAM	2018-02-07	-5.34625	0.0108028	-27.9843	0.117211	-2.79609	0.0208654	30.3805	21.299	8.69528	14.7857	0.106048	0.043294
WP- STREAM	2018-03-23	-5.30503	0.015879	-27.793	0.0935939	-2.7739	0.0298321	30.7618	20.9179	7.90622	14.6472	0.185122	0.0699694
WP- STREAM	2018-05-16	-5.23601	0.0414637	-27.7136	0.172211	-2.73925	0.0316461	28.8703	18.8112	7.10996	14.1745	0.198411	0.0749925
WP- STREAM	2019-01-03	-5.4232	0.0308476	-29.1975	0.41471	-2.8514	0.0132017	15.7672	15.4135	5.82574	14.1881	0.211652	0.0799968

## Sheet: Table_Fig.10,11,15
Drip Site	Date	Ca molL-1	Mg/Ca (mmol/mol)	Sr/Ca (mmol/mol)
WP-1-1	2016-10-18	1.1524	34.1391	0.537043
WP-1-1	2016-11-16	1.1916	35.4649	0.536578
WP-1-1	2016-11-29	1.16973	33.4725	0.526151
WP-1-1	2016-12-15	1.14732	34.1651	0.554692
WP-1-1	2017-01-17	0.924524	39.4983	0.637989
WP-1-1	2017-02-09	0.893771	47.2756	0.824068
WP-1-1	2017-03-21	1.19712	34.5879	0.566352
WP-1-1	2017-04-11	1.06567	39.9781	0.618359
WP-1-1	2017-04-20	1.19643	37.4057	0.622479
WP-1-1	2017-06-01	1.35974	33.8009	0.559019
WP-1-1	2017-07-05	1.27868	32.5796	0.540162
WP-1-1	2017-09-26	1.14285	36.9225	0.561753
WP-1-1	2017-10-04	1.20412	34.7233	0.535587
WP-1-1	2017-11-24	0.952066	44.5276	0.777919
WP-1-1	2017-11-28	1.06959	39.5134	0.620864
WP-1-1	2017-12-12	0.984275	43.8982	0.717387
WP-1-1	2018-01-11	0.846906	47.123	0.855026
WP-1-1	2018-02-07	0.79004	52.3739	0.939583
WP-1-1	2018-03-23	1.27623	33.3527	0.434283
WP-1-1	2018-05-16	1.01623	41.9835	0.547069
WP-1-1	2018-06-28	0.885158	47.65	0.616729
WP-1-1	2018-07-27	0.842112	48.8066	0.616947
WP-1-1	2018-08-31	0.766477	52.8999	0.670338
WP-1-1	2018-12-18	0.859075	53.3811	0.910603
WP-1-1	2019-01-03	0.972611	45.8366	0.791996
WP-1-1	2019-02-20	0.752475	63.882	1.11465
WP-1-2	2016-10-18	1.24194	32.2328	0.49962
WP-1-2	2016-11-16	1.24003	33.591	0.506121
WP-1-2	2016-11-29	1.18884	32.0701	0.507978
WP-1-2	2016-12-15	1.19678	32.1427	0.523563
WP-1-2	2017-01-17	1.03642	36.9865	0.593615
WP-1-2	2017-02-09	0.958131	45.1665	0.743854
WP-1-2	2017-04-20	1.23054	34.9969	0.575525
WP-1-2	2017-06-01	1.46378	30.7022	0.538929
WP-1-2	2017-07-05	1.33176	31.7396	0.54026
WP-1-2	2017-09-26	1.21347	34.8364	0.523438
WP-1-2	2017-10-04	1.3303	32.9695	0.491933
WP-1-2	2017-11-24	0.978294	42.9735	0.754473
WP-1-2	2017-11-28	1.18367	36.5394	0.594969
WP-1-2	2017-12-12	0.981245	42.4203	0.745005
WP-1-2	2018-01-11	0.899734	45.4493	0.804811
WP-1-2	2018-02-07	1.48722	26.3163	0.346173
WP-1-2	2018-03-23	1.24016	32.3039	0.412781
WP-1-2	2018-05-16	1.25095	34.6091	0.452574
WP-1-2	2018-06-28	1.07403	41.5467	0.520738
WP-1-2	2018-07-27	0.919251	44.4033	0.573271
WP-1-2	2018-08-31	0.825635	46.1119	0.596623
WP-1-2	2018-12-18	0.987636	48.5272	0.79557
WP-1-2	2019-01-03	1.1668	39.86	0.707984
WP-1-2	2019-01-17	1.18324	39.3531	0.63689
WP-1-2	2019-02-20	0.840043	59.8075	1.03136
WP 1-3	2016-10-18	1.21176	31.5884	0.491531
WP 1-3	2016-11-16	1.32904	32.9426	0.476854
WP-1-3	2016-11-29	1.2705	31.2054	0.491496
WP-1-3	2016-12-15	1.22465	31.5276	0.518946
WP-1-3	2017-01-17	1.04736	36.8389	0.593781
WP-1-3	2017-02-09	1.03958	43.4996	0.704955
WP-1-3	2017-03-21	0.962558	37.6984	0.663061
WP-1-3	2017-04-11	1.20501	36.6723	0.6081
WP-1-3	2017-04-20	1.26172	34.2097	0.570167
WP-1-3	2017-06-01	1.51295	30.3074	0.499668
WP-1-3	2017-07-05	1.39485	31.4186	0.543064
WP-1-3	2017-09-26	1.22068	34.8551	0.527225
WP-1-3	2017-10-04	1.23373	33.1632	0.50685
WP-1-3	2017-11-24	1.02909	41.495	0.730253
WP-1-3	2017-11-28	1.21116	36.6626	0.583575
WP-1-3	2017-12-12	0.968323	42.0978	0.729818
WP-1-3	2018-01-11	0.999488	41.3982	0.739388
WP-1-3	2018-02-07	0.897014	45.4815	0.837215
WP-1-3	2018-03-23	1.25895	35.0296	0.445385
WP-1-3	2018-05-16	1.24619	35.4783	0.458206
WP-1-3	2018-06-28	1.01991	42.2053	0.5335
WP-1-3	2018-07-27	0.943456	43.2259	0.567866
WP-1-3	2018-08-31	0.873516	46.5589	0.59222
WP-1-3	2018-12-18	1.0748	43.9929	0.742627
WP-1-3	2019-01-03	1.14005	40.6698	0.694513
WP-1-3	2019-01-17	1.23948	37.3449	0.611711
WP-1-3	2019-02-20	0.874121	55.6335	0.949766
WP-1-4	2017-04-11	1.19722	37.0458	0.630047
WP-1-4	2017-04-20	1.07761	41.5138	0.706164
WP-1-4	2017-06-01	1.22751	33.7025	0.58254
WP-1-4	2017-07-05	1.20055	33.8749	0.576375
WP-1-4	2017-09-26	1.16534	36.9492	0.558148
WP-1-4	2017-10-04	1.21613	34.5597	0.5313
WP-1-4	2018-01-11	1.23197	33.1604	0.614607
WP-1-4	2018-02-07	2.23952	17.7724	0.246831
WP-1-4	2018-03-23	1.29871	31.7958	0.4205
WP-1-4	2018-05-16	1.10394	39.8643	0.515986
WP-1-4	2018-06-28	0.962529	43.7318	0.581063
WP-1-4	2018-07-27	0.89741	44.677	0.577049
WP-1-4	2018-08-31	0.822544	49.5089	0.622328
WP-1-4	2018-12-18	0.973211	48.3461	0.819301
WP-1-4	2019-01-03	1.16866	40.8645	0.712395
WP-1-4	2019-01-17	1.13809	40.4087	0.656262
WP-1-4	2019-02-20	0.736544	66.5504	1.11592
WP-1A	2016-10-18	1.23784	32.61	0.523613
WP-1A	2016-11-16	1.28836	32.7044	0.48324
WP-1A	2016-12-15	1.24739	31.7182	0.508672
WP-1A	2017-01-17	1.13187	33.0223	0.558048
WP-1A	2017-02-09	1.15365	39.0875	0.64358
WP-1A	2017-03-21	1.05754	36.5307	0.595712
WP-1A	2017-04-11	1.16111	36.1246	0.581041
WP-1A	2017-04-20	1.25905	35.8455	0.617892
WP-1A	2017-06-01	1.39245	30.5775	0.505127
WP-1A	2017-07-05	1.54546	26.8647	0.495275
WP-1A	2017-09-26	1.21496	34.1549	0.533991
WP-1A	2017-10-04	1.33687	33.5799	0.507802
WP-1A	2018-01-11	0.841191	45.879	0.845978
WP-1B	2016-10-18	1.21429	32.0117	0.519331
WP-1B	2016-11-16	1.23263	34.1164	0.511993
WP-1B	2016-12-15	1.10571	35.3333	0.570992
WP-1B	2017-01-17	0.872733	43.0242	0.69029
WP-1B	2017-02-09	0.834589	53.331	0.860083
WP-1B	2017-03-21	1.06633	40.2882	0.625416
WP-1B	2017-04-11	1.27254	37.4341	0.596818
WP-1B	2017-04-20	1.22384	36.444	0.606693
WP-1B	2017-06-01	1.34653	31.7291	0.547115
WP-1B	2017-07-05	1.25797	32.659	0.581699
WP-1B	2017-09-26	1.21073	34.523	0.536754
WP-1B	2017-10-04	1.23281	34.1083	0.523371
WP-1B	2018-01-11	0.960019	42.6571	0.760644
WP-2	2016-10-18	1.2907	29.3892	0.423067
WP-2	2016-11-16	1.79935	31.6083	0.446185
WP-2	2017-01-17	1.58218	31.6794	0.475215
WP-2	2017-02-09	1.55282	34.0248	0.55308
WP-2	2017-03-21	1.36246	37.0507	0.56727
WP-2	2017-04-11	1.46602	33.5517	0.509606
WP-2	2017-04-20	1.82095	29.1325	0.436974
WP-2	2017-06-01	1.52751	27.5495	0.427884
WP-2	2017-07-05	1.60218	26.4919	0.427144
WP-2	2017-09-26	1.22901	32.4572	0.464054
WP-2	2017-10-04	1.27218	32.2038	0.461197
WP-2	2017-11-24	1.33972	36.7434	0.593008
WP-2	2017-11-28	1.33085	38.8817	0.572493
WP-2	2017-12-12	1.40901	36.5896	0.573881
WP-2	2018-01-11	1.15905	40.5087	0.675576
WP-2	2018-02-07	1.10701	43.3744	0.746475
WP-2	2018-03-23	1.72976	27.0942	0.341585
WP-2	2018-05-16	1.50779	32.218	0.394936
WP-2	2018-12-18	1.30433	40.3634	0.652805
WP-2	2019-01-03	1.66226	36.0566	0.569801
WP-2	2019-01-17	1.59322	39.1975	0.601873
WP-2	2019-02-20	1.39818	44.0725	0.713992
WP-3	2016-10-18	1.09219	27.9173	0.417076
WP-3	2016-11-16	1.16589	27.3606	0.411177
WP-3	2016-12-15	1.23546	26.7488	0.426215
WP-3	2017-01-17	1.18173	27.3434	0.439014
WP-3	2017-02-09	1.23933	31.0827	0.509807
WP-3	2017-03-21	1.0791	33.0298	0.534039
WP-3	2017-04-11	1.18287	30.2977	0.478706
WP-3	2017-04-20	1.24802	29.8068	0.50748
WP-3	2017-06-01	1.44184	25.2836	0.403156
WP-3	2017-07-05	1.34851	24.7667	0.392249
WP-3	2017-09-26	1.04735	28.9517	0.44988
WP-3	2017-10-04	1.04784	29.7808	0.438659
WP-3	2017-11-24	1.00297	34.1144	0.590633
WP-3	2017-11-28	1.03298	34.2615	0.544625
WP-3	2017-12-12	0.976079	34.6817	0.568062
WP-3	2018-01-11	0.871833	40.2508	0.701021
WP-3	2018-02-07	1.45913	22.8798	0.295082
WP-3	2018-03-23	1.24507	29.6059	0.361378
WP-3	2018-05-16	1.10935	32.9371	0.413186
WP-3	2018-12-18	1.23478	31.398	0.518922
WP-3	2019-01-03	1.1305	32.8032	0.5658
WP-3	2019-02-20	1.20692	36.1562	0.611632
WP-4	2017-04-11	1.24095	33.607	0.563663
WP-4	2017-04-20	1.08463	29.471	0.508144
WP-4	2017-06-01	1.60827	27.9262	0.469248
WP-4	2017-07-05	1.55928	27.4356	0.485439
WP-4	2017-09-26	1.42488	33.0904	0.52177
WP-4	2017-11-24	1.19438	40.1376	0.704622
WP-4	2017-11-28	1.30223	38.6645	0.620134
WP-4	2017-12-12	1.16369	40.6178	0.665914
WP-4	2018-01-11	0.992094	43.6259	0.80695
WP-4	2018-02-07	1.47024	27.1636	0.357421
WP-4	2018-03-23	1.29265	33.0549	0.427777
WP-4	2018-05-16	1.21914	36.0723	0.461452
WP-4	2018-12-18	1.3765	36.7886	0.644514
WP-4	2019-01-03	1.39364	36.2964	0.655945
WP-4	2019-01-17	1.31808	38.4646	0.635663
WP-4	2019-02-20	1.26441	43.1716	0.737662
WP-FlowBottom	2017-12-12	2.27397	21.1737	0.399999
WP-FlowBottom	2018-01-11	0.843636	50.1216	0.907989
WP-FlowBottom	2018-07-02	1.08565	36.4673	0.450293
WP-FlowBottom	2018-03-23	1.05507	43.1158	0.535417
WP-FlowBottom	2018-12-18	0.784039	58.5666	0.963209
WP-FlowBottom	2019-01-03	0.93131	48.6415	0.879813
WP-FlowBottom	2019-01-17	0.932656	50.5141	0.809772
WP-FlowBottom	2019-02-20	0.722528	61.474	1.03373

## Sheet: Table_Fig.12
Date	External Air Temp (°C)	Cave Air Temp (°C)	DTcave-external air [⁰C]		Date	CO2
06.01.17 01:00:00 PM	12.389	10.051	-2.338		2017-09-26	460
06.01.17 01:30:00 PM	12.364	9.879	-2.485		2017-10-04	475
06.01.17 02:00:00 PM	12.292	9.854	-2.438		2017-12-05	583
06.01.17 02:30:00 PM	12.799	9.854	-2.945		2017-12-12	900
06.01.17 03:00:00 PM	12.606	9.854	-2.752		2018-01-11	659
06.01.17 03:30:00 PM	11.88	9.854	-2.026		2018-03-23	920
06.01.17 04:00:00 PM	11.151	9.854	-1.297
06.01.17 04:30:00 PM	10.761	9.879	-0.882
06.01.17 05:00:00 PM	10.369	9.879	-0.49
06.01.17 05:30:00 PM	9.903	9.879	-0.024
06.01.17 06:00:00 PM	9.336	9.854	0.518
06.01.17 06:30:00 PM	9.213	9.854	0.641
06.01.17 07:00:00 PM	8.941	9.854	0.913
06.01.17 07:30:00 PM	8.866	9.829	0.963
06.01.17 08:00:00 PM	8.668	9.829	1.161
06.01.17 08:30:00 PM	8.543	9.805	1.262
06.01.17 09:00:00 PM	8.817	9.829	1.012
06.01.17 09:30:00 PM	8.916	9.829	0.913
06.01.17 10:00:00 PM	8.643	9.805	1.162
06.01.17 10:30:00 PM	8.444	9.805	1.361
06.01.17 11:00:00 PM	8.841	9.78	0.939
06.01.17 11:30:00 PM	8.693	9.78	1.087
06.02.17 12:00:00 AM	8.693	9.78	1.087
06.02.17 12:30:00 AM	8.494	9.78	1.286
06.02.17 01:00:00 AM	8.593	9.78	1.187
06.02.17 01:30:00 AM	8.643	9.805	1.162
06.02.17 02:00:00 AM	8.444	9.805	1.361
06.02.17 02:30:00 AM	7.82	9.78	1.96
06.02.17 03:00:00 AM	7.494	9.78	2.286
06.02.17 03:30:00 AM	7.594	9.78	2.186
06.02.17 04:00:00 AM	7.519	9.78	2.261
06.02.17 04:30:00 AM	7.569	9.78	2.211
06.02.17 05:00:00 AM	7.619	9.78	2.161
06.02.17 05:30:00 AM	7.519	9.78	2.261
06.02.17 06:00:00 AM	7.569	9.78	2.211
06.02.17 06:30:00 AM	7.544	9.78	2.236
06.02.17 07:00:00 AM	7.419	9.78	2.361
06.02.17 07:30:00 AM	7.544	9.78	2.236
06.02.17 08:00:00 AM	7.594	9.78	2.186
06.02.17 08:30:00 AM	7.77	9.78	2.01
06.02.17 09:00:00 AM	7.97	9.805	1.835
06.02.17 09:30:00 AM	8.444	9.805	1.361
06.02.17 10:00:00 AM	9.46	9.805	0.345
06.02.17 10:30:00 AM	10.907	9.805	-1.102
06.02.17 11:00:00 AM	10.858	9.805	-1.053
06.02.17 11:30:00 AM	10.712	9.829	-0.883
06.02.17 12:00:00 PM	11.467	9.829	-1.638
06.02.17 12:30:00 PM	11.346	9.829	-1.517
06.02.17 01:00:00 PM	11.589	9.829	-1.76
06.02.17 01:30:00 PM	11.832	9.829	-2.003
06.02.17 02:00:00 PM	11.856	9.829	-2.027
06.02.17 02:30:00 PM	11.759	9.829	-1.93
06.02.17 03:00:00 PM	11.71	9.854	-1.856
06.02.17 03:30:00 PM	11.492	9.854	-1.638
06.02.17 04:00:00 PM	11.029	9.854	-1.175
06.02.17 04:30:00 PM	10.443	9.854	-0.589
06.02.17 05:00:00 PM	9.78	9.879	0.099
06.02.17 05:30:00 PM	9.238	9.903	0.665
06.02.17 06:00:00 PM	9.139	9.903	0.764
06.02.17 06:30:00 PM	9.089	9.903	0.814
06.02.17 07:00:00 PM	9.188	9.928	0.74
06.02.17 07:30:00 PM	9.015	9.928	0.913
06.02.17 08:00:00 PM	8.717	9.928	1.211
06.02.17 08:30:00 PM	8.543	9.928	1.385
06.02.17 09:00:00 PM	8.767	9.952	1.185
06.02.17 09:30:00 PM	8.941	9.952	1.011
06.02.17 10:00:00 PM	8.941	9.952	1.011
06.02.17 10:30:00 PM	8.817	9.952	1.135
06.02.17 11:00:00 PM	8.817	9.952	1.135
06.02.17 11:30:00 PM	8.767	9.952	1.185
06.03.17 12:00:00 AM	8.792	9.952	1.16
06.03.17 12:30:00 AM	8.817	9.977	1.16
06.03.17 01:00:00 AM	9.04	9.952	0.912
06.03.17 01:30:00 AM	9.188	9.952	0.764
06.03.17 02:00:00 AM	9.287	9.952	0.665
06.03.17 02:30:00 AM	9.287	9.952	0.665
06.03.17 03:00:00 AM	9.238	9.952	0.714
06.03.17 03:30:00 AM	9.41	9.952	0.542
06.03.17 04:00:00 AM	9.114	9.977	0.863
06.03.17 04:30:00 AM	9.188	9.977	0.789
06.03.17 05:00:00 AM	9.188	10.001	0.813
06.03.17 05:30:00 AM	8.965	10.001	1.036
06.03.17 06:00:00 AM	8.891	10.001	1.11
06.03.17 06:30:00 AM	8.295	10.001	1.706
06.03.17 07:00:00 AM	7.242	9.977	2.735
06.03.17 07:30:00 AM	6.687	9.952	3.265
06.03.17 08:00:00 AM	6.712	9.952	3.24
06.03.17 08:30:00 AM	6.813	9.952	3.139
06.03.17 09:00:00 AM	7.293	9.952	2.659
06.03.17 09:30:00 AM	7.67	9.952	2.282
06.03.17 10:00:00 AM	7.92	9.977	2.057
06.03.17 10:30:00 AM	8.469	10.001	1.532
06.03.17 11:00:00 AM	9.632	10.001	0.369
06.03.17 11:30:00 AM	11.492	9.977	-1.515
06.03.17 12:00:00 PM	13.064	9.977	-3.087
06.03.17 12:30:00 PM	12.485	9.977	-2.508
06.03.17 01:00:00 PM	12.751	9.952	-2.799
06.03.17 01:30:00 PM	12.219	9.952	-2.267
06.03.17 02:00:00 PM	12.025	9.952	-2.073
06.03.17 02:30:00 PM	12.219	9.952	-2.267
06.03.17 03:00:00 PM	12.195	9.952	-2.243
06.03.17 03:30:00 PM	11.419	9.952	-1.467
06.03.17 04:00:00 PM	10.736	9.952	-0.784
06.03.17 04:30:00 PM	10.075	9.977	-0.098
06.03.17 05:00:00 PM	9.213	9.952	0.739
06.03.17 05:30:00 PM	8.519	9.952	1.433
06.03.17 06:00:00 PM	7.945	9.928	1.983
06.03.17 06:30:00 PM	7.619	9.903	2.284
06.03.17 07:00:00 PM	7.494	9.903	2.409
06.03.17 07:30:00 PM	7.444	9.879	2.435
06.03.17 08:00:00 PM	7.544	9.879	2.335
06.03.17 08:30:00 PM	7.519	9.854	2.335
06.03.17 09:00:00 PM	7.343	9.854	2.511
06.03.17 09:30:00 PM	6.661	9.854	3.193
06.03.17 10:00:00 PM	6.281	9.829	3.548
06.03.17 10:30:00 PM	6	9.805	3.805
06.03.17 11:00:00 PM	5.796	9.78	3.984
06.03.17 11:30:00 PM	5.591	9.756	4.165
06.04.17 12:00:00 AM	5.514	9.731	4.217
06.04.17 12:30:00 AM	5.282	9.706	4.424
06.04.17 01:00:00 AM	4.921	9.682	4.761
06.04.17 01:30:00 AM	4.714	9.657	4.943
06.04.17 02:00:00 AM	4.636	9.608	4.972
06.04.17 02:30:00 AM	4.558	9.608	5.05
06.04.17 03:00:00 AM	4.48	9.583	5.103
06.04.17 03:30:00 AM	4.298	9.558	5.26
06.04.17 04:00:00 AM	4.168	9.534	5.366
06.04.17 04:30:00 AM	4.999	9.509	4.51
06.04.17 05:00:00 AM	5.102	9.509	4.407
06.04.17 05:30:00 AM	5.308	9.509	4.201
06.04.17 06:00:00 AM	5.205	9.485	4.28
06.04.17 06:30:00 AM	4.895	9.509	4.614
06.04.17 07:00:00 AM	4.74	9.509	4.769
06.04.17 07:30:00 AM	4.584	9.485	4.901
06.04.17 08:00:00 AM	4.636	9.435	4.799
06.04.17 08:30:00 AM	5.308	9.41	4.102
06.04.17 09:00:00 AM	5.949	9.41	3.461
06.04.17 09:30:00 AM	6.839	9.435	2.596
06.04.17 10:00:00 AM	7.645	9.435	1.79
06.04.17 10:30:00 AM	8.319	9.46	1.141
06.04.17 11:00:00 AM	9.213	9.485	0.272
06.04.17 11:30:00 AM	9.731	9.485	-0.246
06.04.17 12:00:00 PM	9.632	9.485	-0.147
06.04.17 12:30:00 PM	9.682	9.485	-0.197
06.04.17 01:00:00 PM	9.952	9.509	-0.443
06.04.17 01:30:00 PM	10.247	9.509	-0.738
06.04.17 02:00:00 PM	9.805	9.509	-0.296
06.04.17 02:30:00 PM	10.149	9.509	-0.64
06.04.17 03:00:00 PM	10.026	9.509	-0.517
06.04.17 03:30:00 PM	10.051	9.534	-0.517
06.04.17 04:00:00 PM	9.657	9.534	-0.123
06.04.17 04:30:00 PM	8.717	9.534	0.817
06.04.17 05:00:00 PM	7.82	9.509	1.689
06.04.17 05:30:00 PM	7.343	9.534	2.191
06.04.17 06:00:00 PM	7.494	9.534	2.04
06.04.17 06:30:00 PM	7.444	9.534	2.09
06.04.17 07:00:00 PM	7.142	9.509	2.367
06.04.17 07:30:00 PM	7.167	9.509	2.342
06.04.17 08:00:00 PM	6.965	9.509	2.544
06.04.17 08:30:00 PM	6.99	9.509	2.519
06.04.17 09:00:00 PM	6.687	9.509	2.822
06.04.17 09:30:00 PM	6.102	9.485	3.383
06.04.17 10:00:00 PM	5.796	9.46	3.664
06.04.17 10:30:00 PM	5.591	9.435	3.844
06.04.17 11:00:00 PM	5.821	9.41	3.589
06.04.17 11:30:00 PM	6.204	9.41	3.206
06.05.17 12:00:00 AM	6.687	9.435	2.748
06.05.17 12:30:00 AM	6.661	9.46	2.799
06.05.17 01:00:00 AM	6.458	9.435	2.977
06.05.17 01:30:00 AM	6.281	9.46	3.179
06.05.17 02:00:00 AM	6.051	9.46	3.409
06.05.17 02:30:00 AM	5.796	9.435	3.639
06.05.17 03:00:00 AM	6	9.435	3.435
06.05.17 03:30:00 AM	6.204	9.41	3.206
06.05.17 04:00:00 AM	6.357	9.435	3.078
06.05.17 04:30:00 AM	6.458	9.435	2.977
06.05.17 05:00:00 AM	6.433	9.435	3.002
06.05.17 05:30:00 AM	6.458	9.435	2.977
06.05.17 06:00:00 AM	6.484	9.435	2.951
06.05.17 06:30:00 AM	6.585	9.41	2.825
06.05.17 07:00:00 AM	6.585	9.41	2.825
06.05.17 07:30:00 AM	6.636	9.386	2.75
06.05.17 08:00:00 AM	6.839	9.361	2.522
06.05.17 08:30:00 AM	6.99	9.435	2.445
06.05.17 09:00:00 AM	7.041	9.435	2.394
06.05.17 09:30:00 AM	7.393	9.435	2.042
06.05.17 10:00:00 AM	7.544	9.435	1.891
06.05.17 10:30:00 AM	7.544	9.46	1.916
06.05.17 11:00:00 AM	7.494	9.46	1.966
06.05.17 11:30:00 AM	7.494	9.435	1.941
06.05.17 12:00:00 PM	7.645	9.435	1.79
06.05.17 12:30:00 PM	7.995	9.435	1.44
06.05.17 01:00:00 PM	8.369	9.46	1.091
06.05.17 01:30:00 PM	8.494	9.46	0.966
06.05.17 02:00:00 PM	8.717	9.485	0.768
06.05.17 02:30:00 PM	9.163	9.485	0.322
06.05.17 03:00:00 PM	9.386	9.485	0.099
06.05.17 03:30:00 PM	9.114	9.509	0.395
06.05.17 04:00:00 PM	8.916	9.509	0.593
06.05.17 04:30:00 PM	8.767	9.509	0.742
06.05.17 05:00:00 PM	8.717	9.509	0.792
06.05.17 05:30:00 PM	8.643	9.534	0.891
06.05.17 06:00:00 PM	8.568	9.534	0.966
06.05.17 06:30:00 PM	8.369	9.534	1.165
06.05.17 07:00:00 PM	8.369	9.558	1.189
06.05.17 07:30:00 PM	8.17	9.558	1.388
06.05.17 08:00:00 PM	8.145	9.558	1.413
06.05.17 08:30:00 PM	8.095	9.558	1.463
06.05.17 09:00:00 PM	7.97	9.558	1.588
06.05.17 09:30:00 PM	7.845	9.558	1.713
06.05.17 10:00:00 PM	7.72	9.583	1.863
06.05.17 10:30:00 PM	7.695	9.583	1.888
06.05.17 11:00:00 PM	7.619	9.583	1.964
06.05.17 11:30:00 PM	7.519	9.583	2.064
06.06.17 12:00:00 AM	7.544	9.583	2.039
06.06.17 12:30:00 AM	7.142	9.583	2.441
06.06.17 01:00:00 AM	7.066	9.583	2.517
06.06.17 01:30:00 AM	6.611	9.558	2.947
06.06.17 02:00:00 AM	6.153	9.558	3.405
06.06.17 02:30:00 AM	6.128	9.558	3.43
06.06.17 03:00:00 AM	6.382	9.534	3.152
06.06.17 03:30:00 AM	6.433	9.558	3.125
06.06.17 04:00:00 AM	6.306	9.534	3.228
06.06.17 04:30:00 AM	6.179	9.534	3.355
06.06.17 05:00:00 AM	6	9.534	3.534
06.06.17 05:30:00 AM	5.591	9.509	3.918
06.06.17 06:00:00 AM	6.051	9.509	3.458
06.06.17 06:30:00 AM	6.077	9.509	3.432
06.06.17 07:00:00 AM	5.514	9.509	3.995
06.06.17 07:30:00 AM	4.766	9.46	4.694
06.06.17 08:00:00 AM	4.584	9.435	4.851
06.06.17 08:30:00 AM	5.514	9.41	3.896
06.06.17 09:00:00 AM	6.712	9.41	2.698
06.06.17 09:30:00 AM	7.87	9.41	1.54
06.06.17 10:00:00 AM	8.817	9.41	0.593
06.06.17 10:30:00 AM	9.558	9.435	-0.123
06.06.17 11:00:00 AM	10.541	9.435	-1.106
06.06.17 11:30:00 AM	10.907	9.435	-1.472
06.06.17 12:00:00 PM	10.785	9.46	-1.325
06.06.17 12:30:00 PM	10.369	9.46	-0.909
06.06.17 01:00:00 PM	9.879	9.46	-0.419
06.06.17 01:30:00 PM	10.173	9.485	-0.688
06.06.17 02:00:00 PM	9.952	9.485	-0.467
06.06.17 02:30:00 PM	10.59	9.485	-1.105
06.06.17 03:00:00 PM	10.271	9.509	-0.762
06.06.17 03:30:00 PM	9.485	9.509	0.024
06.06.17 04:00:00 PM	9.015	9.509	0.494
06.06.17 04:30:00 PM	8.095	9.509	1.414
06.06.17 05:00:00 PM	7.242	9.485	2.243
06.06.17 05:30:00 PM	6.56	9.46	2.9
06.06.17 06:00:00 PM	6.102	9.46	3.358
06.06.17 06:30:00 PM	5.719	9.435	3.716
06.06.17 07:00:00 PM	5.437	9.41	3.973
06.06.17 07:30:00 PM	5.102	9.386	4.284
06.06.17 08:00:00 PM	4.999	9.361	4.362
06.06.17 08:30:00 PM	4.792	9.336	4.544
06.06.17 09:00:00 PM	4.558	9.336	4.778
06.06.17 09:30:00 PM	4.454	9.287	4.833
06.06.17 10:00:00 PM	4.298	9.262	4.964
06.06.17 10:30:00 PM	4.35	9.262	4.912
06.06.17 11:00:00 PM	4.194	9.213	5.019
06.06.17 11:30:00 PM	4.089	9.188	5.099
06.07.17 12:00:00 AM	4.376	9.163	4.787
06.07.17 12:30:00 AM	4.662	9.139	4.477
06.07.17 01:00:00 AM	5.642	9.114	3.472
06.07.17 01:30:00 AM	5.719	9.114	3.395
06.07.17 02:00:00 AM	5.616	9.089	3.473
06.07.17 02:30:00 AM	5.488	9.089	3.601
06.07.17 03:00:00 AM	5.616	9.064	3.448
06.07.17 03:30:00 AM	5.642	9.04	3.398
06.07.17 04:00:00 AM	5.616	9.015	3.399
06.07.17 04:30:00 AM	5.411	9.015	3.604
06.07.17 05:00:00 AM	5.437	8.99	3.553
06.07.17 05:30:00 AM	5.385	8.99	3.605
06.07.17 06:00:00 AM	5.282	8.965	3.683
06.07.17 06:30:00 AM	5.308	8.99	3.682
06.07.17 07:00:00 AM	4.869	8.965	4.096
06.07.17 07:30:00 AM	5.179	8.916	3.737
06.07.17 08:00:00 AM	5.642	8.941	3.299
06.07.17 08:30:00 AM	6.306	8.916	2.61
06.07.17 09:00:00 AM	7.015	8.916	1.901
06.07.17 09:30:00 AM	8.17	8.965	0.795
06.07.17 10:00:00 AM	9.139	8.99	-0.149
06.07.17 10:30:00 AM	9.952	8.99	-0.962
06.07.17 11:00:00 AM	10.663	9.015	-1.648
06.07.17 11:30:00 AM	11.297	9.04	-2.257
06.07.17 12:00:00 PM	10.001	9.064	-0.937
06.07.17 12:30:00 PM	9.509	9.089	-0.42
06.07.17 01:00:00 PM	9.46	9.114	-0.346
06.07.17 01:30:00 PM	10.124	9.139	-0.985
06.07.17 02:00:00 PM	10.638	9.139	-1.499
06.07.17 02:30:00 PM	10.443	9.163	-1.28
06.07.17 03:00:00 PM	10.149	9.312	-0.837
06.07.17 03:30:00 PM	9.854	9.312	-0.542
06.07.17 04:00:00 PM	9.089	9.312	0.223
06.07.17 04:30:00 PM	8.643	9.262	0.619
06.07.17 05:00:00 PM	7.945	9.386	1.441
06.07.17 05:30:00 PM	7.544	9.287	1.743
06.07.17 06:00:00 PM	7.242	9.336	2.094
06.07.17 06:30:00 PM	7.268	9.287	2.019
06.07.17 07:00:00 PM	7.293	9.262	1.969
06.07.17 07:30:00 PM	7.343	9.287	1.944
06.07.17 08:00:00 PM	7.293	9.262	1.969
06.07.17 08:30:00 PM	7.242	9.213	1.971
06.07.17 09:00:00 PM	7.041	9.213	2.172
06.07.17 09:30:00 PM	6.788	9.213	2.425
06.07.17 10:00:00 PM	6.661	9.188	2.527
06.07.17 10:30:00 PM	6.281	9.163	2.882
06.07.17 11:00:00 PM	6.102	9.163	3.061
06.07.17 11:30:00 PM	5.949	9.139	3.19
06.08.17 12:00:00 AM	5.539	9.114	3.575
06.08.17 12:30:00 AM	4.869	9.089	4.22
06.08.17 01:00:00 AM	4.454	9.064	4.61
06.08.17 01:30:00 AM	4.115	9.015	4.9
06.08.17 02:00:00 AM	3.932	8.965	5.033
06.08.17 02:30:00 AM	3.985	8.965	4.98
06.08.17 03:00:00 AM	4.194	8.916	4.722
06.08.17 03:30:00 AM	4.584	8.916	4.332
06.08.17 04:00:00 AM	4.115	8.916	4.801
06.08.17 04:30:00 AM	4.011	8.891	4.88
06.08.17 05:00:00 AM	4.194	8.866	4.672
06.08.17 05:30:00 AM	4.246	8.866	4.62
06.08.17 06:00:00 AM	4.272	8.891	4.619
06.08.17 06:30:00 AM	4.168	8.866	4.698
06.08.17 07:00:00 AM	4.246	8.841	4.595
06.08.17 07:30:00 AM	4.011	8.817	4.806
06.08.17 08:00:00 AM	3.538	8.792	5.254
06.08.17 08:30:00 AM	4.584	8.767	4.183
06.08.17 09:00:00 AM	5.872	8.767	2.895
06.08.17 09:30:00 AM	6.56	8.792	2.232
06.08.17 10:00:00 AM	7.519	8.792	1.273
06.08.17 10:30:00 AM	8.07	8.817	0.747
06.08.17 11:00:00 AM	8.519	8.841	0.322
06.08.17 11:30:00 AM	8.817	8.841	0.024
06.08.17 12:00:00 PM	8.916	8.841	-0.075
06.08.17 12:30:00 PM	9.163	8.866	-0.297
06.08.17 01:00:00 PM	9.41	8.866	-0.544
06.08.17 01:30:00 PM	9.312	8.891	-0.421
06.08.17 02:00:00 PM	9.583	8.891	-0.692
06.08.17 02:30:00 PM	9.534	8.891	-0.643
06.08.17 03:00:00 PM	9.558	8.916	-0.642
06.08.17 03:30:00 PM	9.558	8.916	-0.642
06.08.17 04:00:00 PM	9.089	8.916	-0.173
06.08.17 04:30:00 PM	8.344	8.941	0.597
06.08.17 05:00:00 PM	7.519	8.941	1.422
06.08.17 05:30:00 PM	6.965	8.941	1.976
06.08.17 06:00:00 PM	6.382	8.965	2.583
06.08.17 06:30:00 PM	6.051	8.941	2.89
06.08.17 07:00:00 PM	6.382	8.941	2.559
06.08.17 07:30:00 PM	6.636	8.965	2.329
06.08.17 08:00:00 PM	6.535	8.941	2.406
06.08.17 08:30:00 PM	6.408	8.916	2.508
06.08.17 09:00:00 PM	6.306	8.916	2.61
06.08.17 09:30:00 PM	5.949	8.891	2.942
06.08.17 10:00:00 PM	5.719	8.891	3.172
06.08.17 10:30:00 PM	5.36	8.891	3.531
06.08.17 11:00:00 PM	5.411	8.866	3.455
06.08.17 11:30:00 PM	5.308	8.866	3.558
06.09.17 12:00:00 AM	5.437	8.866	3.429
06.09.17 12:30:00 AM	5.385	8.841	3.456
06.09.17 01:00:00 AM	5.205	8.841	3.636
06.09.17 01:30:00 AM	5.385	8.817	3.432
06.09.17 02:00:00 AM	5.257	8.817	3.56
06.09.17 02:30:00 AM	5.024	8.817	3.793
06.09.17 03:00:00 AM	4.895	8.792	3.897
06.09.17 03:30:00 AM	4.973	8.767	3.794
06.09.17 04:00:00 AM	5.05	8.742	3.692
06.09.17 04:30:00 AM	4.818	8.742	3.924
06.09.17 05:00:00 AM	4.376	8.717	4.341
06.09.17 05:30:00 AM	4.35	8.693	4.343
06.09.17 06:00:00 AM	4.194	8.668	4.474
06.09.17 06:30:00 AM	3.958	8.668	4.71
06.09.17 07:00:00 AM	3.932	8.643	4.711
06.09.17 07:30:00 AM	4.324	8.618	4.294
06.09.17 08:00:00 AM	4.168	8.618	4.45
06.09.17 08:30:00 AM	4.999	8.618	3.619
06.09.17 09:00:00 AM	6.051	8.643	2.592
06.09.17 09:30:00 AM	7.217	8.668	1.451
06.09.17 10:00:00 AM	8.22	8.668	0.448
06.09.17 10:30:00 AM	9.114	8.693	-0.421
06.09.17 11:00:00 AM	9.854	8.693	-1.161
06.09.17 11:30:00 AM	10.467	8.717	-1.75
06.09.17 12:00:00 PM	10.492	8.717	-1.775
06.09.17 12:30:00 PM	10.32	8.742	-1.578
06.09.17 01:00:00 PM	10.247	8.767	-1.48
06.09.17 01:30:00 PM	10.394	8.767	-1.627
06.09.17 02:00:00 PM	10.345	8.767	-1.578
06.09.17 02:30:00 PM	10.051	8.792	-1.259
06.09.17 03:00:00 PM	9.829	8.792	-1.037
06.09.17 03:30:00 PM	9.854	8.817	-1.037
06.09.17 04:00:00 PM	9.805	8.817	-0.988
06.09.17 04:30:00 PM	9.361	8.841	-0.52
06.09.17 05:00:00 PM	8.965	8.866	-0.099
06.09.17 05:30:00 PM	8.444	8.866	0.422
06.09.17 06:00:00 PM	8.12	8.866	0.746
06.09.17 06:30:00 PM	7.945	8.866	0.921
06.09.17 07:00:00 PM	7.895	8.866	0.971
06.09.17 07:30:00 PM	7.82	8.891	1.071
06.09.17 08:00:00 PM	7.795	8.916	1.121
06.09.17 08:30:00 PM	7.67	8.916	1.246
06.09.17 09:00:00 PM	7.594	8.916	1.322
06.09.17 09:30:00 PM	7.645	8.916	1.271
06.09.17 10:00:00 PM	7.745	8.941	1.196
06.09.17 10:30:00 PM	7.795	8.941	1.146
06.09.17 11:00:00 PM	7.569	8.965	1.396
06.09.17 11:30:00 PM	7.368	8.965	1.597
06.10.17 12:00:00 AM	7.393	8.965	1.572
06.10.17 12:30:00 AM	7.419	8.965	1.546
06.10.17 01:00:00 AM	7.217	8.99	1.773
06.10.17 01:30:00 AM	7.87	8.99	1.12
06.10.17 02:00:00 AM	7.845	9.015	1.17
06.10.17 02:30:00 AM	8.07	8.99	0.92
06.10.17 03:00:00 AM	7.519	8.99	1.471
06.10.17 03:30:00 AM	7.393	9.015	1.622
06.10.17 04:00:00 AM	7.92	9.064	1.144
06.10.17 04:30:00 AM	8.17	9.04	0.87
06.10.17 05:00:00 AM	8.27	9.064	0.794
06.10.17 05:30:00 AM	8.12	9.139	1.019
06.10.17 06:00:00 AM	8.02	9.213	1.193
06.10.17 06:30:00 AM	8.17	9.262	1.092
06.10.17 07:00:00 AM	8.319	9.312	0.993
06.10.17 07:30:00 AM	8.419	9.361	0.942
06.10.17 08:00:00 AM	8.469	9.386	0.917
06.10.17 08:30:00 AM	8.668	9.361	0.693
06.10.17 09:00:00 AM	9.114	9.361	0.247
06.10.17 09:30:00 AM	9.632	9.41	-0.222
06.10.17 10:00:00 AM	10.418	9.435	-0.983
06.10.17 10:30:00 AM	11.102	9.46	-1.642
06.10.17 11:00:00 AM	11.127	9.41	-1.717
06.10.17 11:30:00 AM	11.151	9.485	-1.666
06.10.17 12:00:00 PM	11.2	9.435	-1.765
06.10.17 12:30:00 PM	11.637	9.41	-2.227
06.10.17 01:00:00 PM	11.565	9.509	-2.056
06.10.17 01:30:00 PM	11.856	9.46	-2.396
06.10.17 02:00:00 PM	12.147	9.485	-2.662
06.10.17 02:30:00 PM	11.54	9.485	-2.055
06.10.17 03:00:00 PM	11.297	9.485	-1.812
06.10.17 03:30:00 PM	10.956	9.509	-1.447
06.10.17 04:00:00 PM	10.638	9.558	-1.08
06.10.17 04:30:00 PM	10.32	9.509	-0.811
06.10.17 05:00:00 PM	10.051	9.583	-0.468
06.10.17 05:30:00 PM	9.583	9.608	0.025
06.10.17 06:00:00 PM	9.534	9.608	0.074
06.10.17 06:30:00 PM	9.46	9.534	0.074
06.10.17 07:00:00 PM	9.089	9.509	0.42
06.10.17 07:30:00 PM	9.015	9.485	0.47
06.10.17 08:00:00 PM	8.965	9.46	0.495
06.10.17 08:30:00 PM	8.965	9.46	0.495
06.10.17 09:00:00 PM	8.568	9.46	0.892
06.10.17 09:30:00 PM	7.87	9.435	1.565
06.10.17 10:00:00 PM	7.368	9.435	2.067
06.10.17 10:30:00 PM	6.737	9.41	2.673
06.10.17 11:00:00 PM	6.611	9.386	2.775
06.10.17 11:30:00 PM	6.306	9.361	3.055
06.11.17 12:00:00 AM	6.153	9.336	3.183
06.11.17 12:30:00 AM	6.026	9.312	3.286
06.11.17 01:00:00 AM	5.872	9.287	3.415
06.11.17 01:30:00 AM	5.975	9.262	3.287
06.11.17 02:00:00 AM	5.693	9.238	3.545
06.11.17 02:30:00 AM	5.282	9.213	3.931
06.11.17 03:00:00 AM	5.076	9.188	4.112
06.11.17 03:30:00 AM	4.584	9.163	4.579
06.11.17 04:00:00 AM	4.532	9.139	4.607
06.11.17 04:30:00 AM	4.532	9.114	4.582
06.11.17 05:00:00 AM	4.324	9.089	4.765
06.11.17 05:30:00 AM	4.48	9.064	4.584
06.11.17 06:00:00 AM	4.35	9.04	4.69
06.11.17 06:30:00 AM	4.115	8.99	4.875
06.11.17 07:00:00 AM	3.958	8.965	5.007
06.11.17 07:30:00 AM	3.827	8.941	5.114
06.11.17 08:00:00 AM	3.643	8.891	5.248
06.11.17 08:30:00 AM	4.168	8.866	4.698
06.11.17 09:00:00 AM	5.334	8.866	3.532
06.11.17 09:30:00 AM	6.535	8.891	2.356
06.11.17 10:00:00 AM	7.544	8.891	1.347
06.11.17 10:30:00 AM	8.494	8.916	0.422
06.11.17 11:00:00 AM	9.336	8.941	-0.395
06.11.17 11:30:00 AM	9.854	8.965	-0.889
06.11.17 12:00:00 PM	9.952	8.965	-0.987
06.11.17 12:30:00 PM	10.075	8.965	-1.11
06.11.17 01:00:00 PM	10.369	8.99	-1.379
06.11.17 01:30:00 PM	10.687	8.99	-1.697
06.11.17 02:00:00 PM	10.663	9.015	-1.648
06.11.17 02:30:00 PM	10.785	9.015	-1.77
06.11.17 03:00:00 PM	10.614	9.04	-1.574
06.11.17 03:30:00 PM	10.124	9.04	-1.084
06.11.17 04:00:00 PM	9.78	9.064	-0.716
06.11.17 04:30:00 PM	9.558	9.064	-0.494
06.11.17 05:00:00 PM	9.312	9.064	-0.248
06.11.17 05:30:00 PM	9.238	9.064	-0.174
06.11.17 06:00:00 PM	9.163	9.064	-0.099
06.11.17 06:30:00 PM	8.916	9.089	0.173
06.11.17 07:00:00 PM	8.419	9.064	0.645
06.11.17 07:30:00 PM	8.469	9.064	0.595
06.11.17 08:00:00 PM	8.27	9.064	0.794
06.11.17 08:30:00 PM	7.97	9.064	1.094
06.11.17 09:00:00 PM	7.92	9.04	1.12
06.11.17 09:30:00 PM	8.095	9.04	0.945
06.11.17 10:00:00 PM	8.369	9.04	0.671
06.11.17 10:30:00 PM	7.945	9.04	1.095
06.11.17 11:00:00 PM	8.494	9.04	0.546
06.11.17 11:30:00 PM	8.543	9.04	0.497
06.12.17 12:00:00 AM	8.593	9.04	0.447
06.12.17 12:30:00 AM	8.295	9.04	0.745
06.12.17 01:00:00 AM	7.995	9.04	1.045
06.12.17 01:30:00 AM	7.995	9.064	1.069
06.12.17 02:00:00 AM	8.095	9.064	0.969
06.12.17 02:30:00 AM	7.87	9.064	1.194
06.12.17 03:00:00 AM	7.895	9.064	1.169
06.12.17 03:30:00 AM	8.394	9.064	0.67
06.12.17 04:00:00 AM	7.895	9.064	1.169
06.12.17 04:30:00 AM	8.195	9.064	0.869
06.12.17 05:00:00 AM	8.319	9.064	0.745
06.12.17 05:30:00 AM	8.295	9.089	0.794
06.12.17 06:00:00 AM	8.27	9.089	0.819
06.12.17 06:30:00 AM	8.419	9.089	0.67
06.12.17 07:00:00 AM	8.045	9.089	1.044
06.12.17 07:30:00 AM	8.07	9.089	1.019
06.12.17 08:00:00 AM	8.295	9.089	0.794
06.12.17 08:30:00 AM	8.344	9.089	0.745
06.12.17 09:00:00 AM	9.262	9.114	-0.148
06.12.17 09:30:00 AM	9.706	9.114	-0.592
06.12.17 10:00:00 AM	10.075	9.114	-0.961
06.12.17 10:30:00 AM	10.98	9.114	-1.866
06.12.17 11:00:00 AM	10.883	9.139	-1.744
06.12.17 11:30:00 AM	10.834	9.139	-1.695
06.12.17 12:00:00 PM	11.613	9.139	-2.474
06.12.17 12:30:00 PM	11.565	9.262	-2.303
06.12.17 01:00:00 PM	11.151	9.188	-1.963
06.12.17 01:30:00 PM	11.175	9.213	-1.962
06.12.17 02:00:00 PM	11.443	9.213	-2.23
06.12.17 02:30:00 PM	10.932	9.238	-1.694
06.12.17 03:00:00 PM	10.59	9.262	-1.328
06.12.17 03:30:00 PM	10.541	9.262	-1.279
06.12.17 04:00:00 PM	10.369	9.238	-1.131
06.12.17 04:30:00 PM	10.026	9.262	-0.764
06.12.17 05:00:00 PM	9.558	9.262	-0.296
06.12.17 05:30:00 PM	9.731	9.262	-0.469
06.12.17 06:00:00 PM	9.706	9.262	-0.444
06.12.17 06:30:00 PM	9.583	9.287	-0.296
06.12.17 07:00:00 PM	9.657	9.287	-0.37
06.12.17 07:30:00 PM	9.706	9.312	-0.394
06.12.17 08:00:00 PM	9.731	9.361	-0.37
06.12.17 08:30:00 PM	9.509	9.336	-0.173
06.12.17 09:00:00 PM	9.485	9.361	-0.124
06.12.17 09:30:00 PM	9.534	9.336	-0.198
06.12.17 10:00:00 PM	9.262	9.361	0.099
06.12.17 10:30:00 PM	9.312	9.336	0.024
06.12.17 11:00:00 PM	9.064	9.336	0.272
06.12.17 11:30:00 PM	8.916	9.336	0.42
06.13.17 12:00:00 AM	8.693	9.336	0.643
06.13.17 12:30:00 AM	8.792	9.336	0.544
06.13.17 01:00:00 AM	8.866	9.336	0.47
06.13.17 01:30:00 AM	8.792	9.361	0.569
06.13.17 02:00:00 AM	8.618	9.361	0.743
06.13.17 02:30:00 AM	8.369	9.361	0.992
06.13.17 03:00:00 AM	8.319	9.361	1.042
06.13.17 03:30:00 AM	8.643	9.361	0.718
06.13.17 04:00:00 AM	8.941	9.361	0.42
06.13.17 04:30:00 AM	8.792	9.386	0.594
06.13.17 05:00:00 AM	8.643	9.386	0.743
06.13.17 05:30:00 AM	8.693	9.361	0.668
06.13.17 06:00:00 AM	8.543	9.361	0.818
06.13.17 06:30:00 AM	8.543	9.361	0.818
06.13.17 07:00:00 AM	8.891	9.386	0.495
06.13.17 07:30:00 AM	9.139	9.435	0.296
06.13.17 08:00:00 AM	9.336	9.41	0.074
06.13.17 08:30:00 AM	9.78	9.41	-0.37
06.13.17 09:00:00 AM	10.026	9.41	-0.616
06.13.17 09:30:00 AM	10.271	9.41	-0.861
06.13.17 10:00:00 AM	10.296	9.485	-0.811
06.13.17 10:30:00 AM	10.761	9.534	-1.227
06.13.17 11:00:00 AM	10.98	9.558	-1.422
06.13.17 11:30:00 AM	11.127	9.583	-1.544
06.13.17 12:00:00 PM	11.127	9.608	-1.519
06.13.17 12:30:00 PM	10.883	9.632	-1.251
06.13.17 01:00:00 PM	11.297	9.657	-1.64
06.13.17 01:30:00 PM	11.443	9.682	-1.761
06.13.17 02:00:00 PM	11.394	9.682	-1.712
06.13.17 02:30:00 PM	11.54	9.706	-1.834
06.13.17 03:00:00 PM	11.492	9.706	-1.786
06.13.17 03:30:00 PM	11.321	9.731	-1.59
06.13.17 04:00:00 PM	11.321	9.731	-1.59
06.13.17 04:30:00 PM	11.2	9.731	-1.469
06.13.17 05:00:00 PM	11.029	9.756	-1.273
06.13.17 05:30:00 PM	11.078	9.78	-1.298
06.13.17 06:00:00 PM	11.175	9.78	-1.395
06.13.17 06:30:00 PM	11.2	9.805	-1.395
06.13.17 07:00:00 PM	11.2	9.805	-1.395
06.13.17 07:30:00 PM	11.321	9.805	-1.516
06.13.17 08:00:00 PM	11.248	9.805	-1.443
06.13.17 08:30:00 PM	10.736	9.829	-0.907
06.13.17 09:00:00 PM	10.467	9.829	-0.638
06.13.17 09:30:00 PM	10.492	9.829	-0.663
06.13.17 10:00:00 PM	10.345	9.854	-0.491
06.13.17 10:30:00 PM	10.443	9.854	-0.589
06.13.17 11:00:00 PM	10.149	9.829	-0.32
06.13.17 11:30:00 PM	10.1	9.805	-0.295
06.14.17 12:00:00 AM	9.952	9.805	-0.147
06.14.17 12:30:00 AM	9.854	9.829	-0.025
06.14.17 01:00:00 AM	9.583	9.829	0.246
06.14.17 01:30:00 AM	9.312	9.829	0.517
06.14.17 02:00:00 AM	8.767	9.829	1.062
06.14.17 02:30:00 AM	8.767	9.854	1.087
06.14.17 03:00:00 AM	8.965	9.879	0.914
06.14.17 03:30:00 AM	8.817	9.903	1.086
06.14.17 04:00:00 AM	8.742	9.928	1.186
06.14.17 04:30:00 AM	8.643	9.928	1.285
06.14.17 05:00:00 AM	8.295	9.928	1.633
06.14.17 05:30:00 AM	7.995	9.952	1.957
06.14.17 06:00:00 AM	7.569	9.952	2.383
06.14.17 06:30:00 AM	7.167	10.001	2.834
06.14.17 07:00:00 AM	6.535	9.977	3.442
06.14.17 07:30:00 AM	6.56	9.977	3.417
06.14.17 08:00:00 AM	6.357	9.977	3.62
06.14.17 08:30:00 AM	6.306	10.001	3.695
06.14.17 09:00:00 AM	6.051	10.001	3.95
06.14.17 09:30:00 AM	6.255	10.001	3.746
06.14.17 10:00:00 AM	6.56	10.026	3.466
06.14.17 10:30:00 AM	7.167	10.001	2.834
06.14.17 11:00:00 AM	7.594	10.001	2.407
06.14.17 11:30:00 AM	8.27	9.977	1.707
06.14.17 12:00:00 PM	7.87	9.977	2.107
06.14.17 12:30:00 PM	8.07	10.001	1.931
06.14.17 01:00:00 PM	8.145	10.026	1.881
06.14.17 01:30:00 PM	8.319	10.026	1.707
06.14.17 02:00:00 PM	8.469	10.026	1.557
06.14.17 02:30:00 PM	8.17	10.051	1.881
06.14.17 03:00:00 PM	8.12	10.051	1.931
06.14.17 03:30:00 PM	8.195	10.051	1.856
06.14.17 04:00:00 PM	7.945	10.051	2.106
06.14.17 04:30:00 PM	7.82	10.001	2.181
06.14.17 05:00:00 PM	7.494	10.001	2.507
06.14.17 05:30:00 PM	7.217	9.952	2.735
06.14.17 06:00:00 PM	7.066	9.903	2.837
06.14.17 06:30:00 PM	6.813	9.879	3.066
06.14.17 07:00:00 PM	6.585	9.854	3.269
06.14.17 07:30:00 PM	6.408	9.829	3.421
06.14.17 08:00:00 PM	6.382	9.805	3.423
06.14.17 08:30:00 PM	6	9.78	3.78
06.14.17 09:00:00 PM	5.847	9.731	3.884
06.14.17 09:30:00 PM	5.668	9.706	4.038
06.14.17 10:00:00 PM	5.076	9.657	4.581
06.14.17 10:30:00 PM	4.766	9.632	4.866
06.14.17 11:00:00 PM	4.558	9.608	5.05
06.14.17 11:30:00 PM	4.298	9.558	5.26
06.15.17 12:00:00 AM	4.298	9.509	5.211
06.15.17 12:30:00 AM	3.88	9.485	5.605
06.15.17 01:00:00 AM	3.932	9.46	5.528
06.15.17 01:30:00 AM	3.827	9.435	5.608
06.15.17 02:00:00 AM	3.749	9.41	5.661
06.15.17 02:30:00 AM	3.932	9.386	5.454
06.15.17 03:00:00 AM	3.906	9.336	5.43
06.15.17 03:30:00 AM	3.722	9.336	5.614
06.15.17 04:00:00 AM	3.406	9.287	5.881
06.15.17 04:30:00 AM	2.983	9.262	6.279
06.15.17 05:00:00 AM	2.823	9.213	6.39
06.15.17 05:30:00 AM	2.61	9.139	6.529
06.15.17 06:00:00 AM	2.53	9.114	6.584
06.15.17 06:30:00 AM	2.823	9.089	6.266
06.15.17 07:00:00 AM	2.45	9.04	6.59
06.15.17 07:30:00 AM	2.289	9.015	6.726
06.15.17 08:00:00 AM	2.209	8.965	6.756
06.15.17 08:30:00 AM	2.664	8.965	6.301
06.15.17 09:00:00 AM	3.932	8.941	5.009
06.15.17 09:30:00 AM	5.154	8.941	3.787
06.15.17 10:00:00 AM	6.585	8.965	2.38
06.15.17 10:30:00 AM	7.494	8.965	1.471
06.15.17 11:00:00 AM	8.444	8.99	0.546
06.15.17 11:30:00 AM	9.41	8.99	-0.42
06.15.17 12:00:00 PM	9.854	9.015	-0.839
06.15.17 12:30:00 PM	9.509	9.064	-0.445
06.15.17 01:00:00 PM	9.534	9.064	-0.47
06.15.17 01:30:00 PM	9.213	9.114	-0.099
06.15.17 02:00:00 PM	9.312	9.114	-0.198
06.15.17 02:30:00 PM	9.287	9.163	-0.124
06.15.17 03:00:00 PM	9.336	9.213	-0.123
06.15.17 03:30:00 PM	9.114	9.312	0.198
06.15.17 04:00:00 PM	8.916	9.336	0.42
06.15.17 04:30:00 PM	8.866	9.238	0.372
06.15.17 05:00:00 PM	8.469	9.262	0.793
06.15.17 05:30:00 PM	8.145	9.312	1.167
06.15.17 06:00:00 PM	8.07	9.41	1.34
06.15.17 06:30:00 PM	7.97	9.41	1.44
06.15.17 07:00:00 PM	7.895	9.41	1.515
06.15.17 07:30:00 PM	7.77	9.46	1.69
06.15.17 08:00:00 PM	7.67	9.534	1.864
06.15.17 08:30:00 PM	7.544	9.558	2.014
06.15.17 09:00:00 PM	7.494	9.608	2.114
06.15.17 09:30:00 PM	7.494	9.608	2.114
06.15.17 10:00:00 PM	7.494	9.657	2.163
06.15.17 10:30:00 PM	7.444	9.657	2.213
06.15.17 11:00:00 PM	7.368	9.682	2.314
06.15.17 11:30:00 PM	7.519	9.706	2.187
06.16.17 12:00:00 AM	7.845	9.706	1.861
06.16.17 12:30:00 AM	8.12	9.632	1.512
06.16.17 01:00:00 AM	8.245	9.731	1.486
06.16.17 01:30:00 AM	8.295	9.632	1.337
06.16.17 02:00:00 AM	8.295	9.583	1.288
06.16.17 02:30:00 AM	8.319	9.583	1.264
06.16.17 03:00:00 AM	8.369	9.583	1.214
06.16.17 03:30:00 AM	8.444	9.632	1.188
06.16.17 04:00:00 AM	8.693	9.583	0.89
06.16.17 04:30:00 AM	8.767	9.583	0.816
06.16.17 05:00:00 AM	8.866	9.558	0.692
06.16.17 05:30:00 AM	8.817	9.558	0.741
06.16.17 06:00:00 AM	8.693	9.558	0.865
06.16.17 06:30:00 AM	8.717	9.534	0.817
06.16.17 07:00:00 AM	8.817	9.534	0.717
06.16.17 07:30:00 AM	8.717	9.558	0.841
06.16.17 08:00:00 AM	8.891	9.534	0.643
06.16.17 08:30:00 AM	9.238	9.534	0.296
06.16.17 09:00:00 AM	9.657	9.534	-0.123
06.16.17 09:30:00 AM	10.467	9.534	-0.933
06.16.17 10:00:00 AM	10.614	9.534	-1.08
06.16.17 10:30:00 AM	11.467	9.534	-1.933
06.16.17 11:00:00 AM	11.734	9.534	-2.2
06.16.17 11:30:00 AM	11.71	9.534	-2.176
06.16.17 12:00:00 PM	12.05	9.534	-2.516
06.16.17 12:30:00 PM	12.098	9.534	-2.564
06.16.17 01:00:00 PM	12.823	9.534	-3.289
06.16.17 01:30:00 PM	12.509	9.558	-2.951
06.16.17 02:00:00 PM	12.389	9.608	-2.781
06.16.17 02:30:00 PM	12.944	9.583	-3.361
06.16.17 03:00:00 PM	12.122	9.583	-2.539
06.16.17 03:30:00 PM	11.419	9.608	-1.811
06.16.17 04:00:00 PM	11.102	9.608	-1.494
06.16.17 04:30:00 PM	10.516	9.583	-0.933
06.16.17 05:00:00 PM	9.879	9.583	-0.296
06.16.17 05:30:00 PM	8.891	9.583	0.692
06.16.17 06:00:00 PM	8.369	9.608	1.239
06.16.17 06:30:00 PM	7.97	9.608	1.638
06.16.17 07:00:00 PM	7.845	9.583	1.738
06.16.17 07:30:00 PM	7.945	9.583	1.638
06.16.17 08:00:00 PM	8.17	9.583	1.413
06.16.17 08:30:00 PM	8.319	9.558	1.239
06.16.17 09:00:00 PM	8.095	9.534	1.439
06.16.17 09:30:00 PM	7.695	9.509	1.814
06.16.17 10:00:00 PM	7.594	9.485	1.891
06.16.17 10:30:00 PM	7.77	9.485	1.715
06.16.17 11:00:00 PM	7.569	9.46	1.891
06.16.17 11:30:00 PM	7.569	9.46	1.891
06.17.17 12:00:00 AM	8.07	9.435	1.365
06.17.17 12:30:00 AM	8.245	9.435	1.19
06.17.17 01:00:00 AM	8.145	9.41	1.265
06.17.17 01:30:00 AM	7.695	9.41	1.715
06.17.17 02:00:00 AM	7.116	9.386	2.27
06.17.17 02:30:00 AM	6.484	9.386	2.902
06.17.17 03:00:00 AM	6.153	9.361	3.208
06.17.17 03:30:00 AM	5.898	9.336	3.438
06.17.17 04:00:00 AM	5.796	9.312	3.516
06.17.17 04:30:00 AM	5.719	9.287	3.568
06.17.17 05:00:00 AM	5.462	9.262	3.8
06.17.17 05:30:00 AM	5.024	9.262	4.238
06.17.17 06:00:00 AM	4.844	9.213	4.369
06.17.17 06:30:00 AM	4.869	9.213	4.344
06.17.17 07:00:00 AM	4.688	9.188	4.5
06.17.17 07:30:00 AM	4.454	9.163	4.709
06.17.17 08:00:00 AM	4.844	9.139	4.295
06.17.17 08:30:00 AM	5.539	9.114	3.575
06.17.17 09:00:00 AM	6.864	9.114	2.25
06.17.17 09:30:00 AM	7.444	9.114	1.67
06.17.17 10:00:00 AM	8.344	9.114	0.77
06.17.17 10:30:00 AM	9.608	9.114	-0.494
06.17.17 11:00:00 AM	11.029	9.139	-1.89
06.17.17 11:30:00 AM	12.074	9.139	-2.935
06.17.17 12:00:00 PM	13.161	9.163	-3.998
06.17.17 12:30:00 PM	12.63	9.163	-3.467
06.17.17 01:00:00 PM	11.662	9.188	-2.474
06.17.17 01:30:00 PM	11.297	9.188	-2.109
06.17.17 02:00:00 PM	11.443	9.213	-2.23
06.17.17 02:30:00 PM	11.443	9.213	-2.23
06.17.17 03:00:00 PM	11.053	9.213	-1.84
06.17.17 03:30:00 PM	10.736	9.213	-1.523
06.17.17 04:00:00 PM	10.541	9.213	-1.328
06.17.17 04:30:00 PM	9.509	9.238	-0.271
06.17.17 05:00:00 PM	8.419	9.213	0.794
06.17.17 05:30:00 PM	7.268	9.213	1.945
06.17.17 06:00:00 PM	6.458	9.188	2.73
06.17.17 06:30:00 PM	5.796	9.163	3.367
06.17.17 07:00:00 PM	5.385	9.163	3.778
06.17.17 07:30:00 PM	5.205	9.139	3.934
06.17.17 08:00:00 PM	5.076	9.114	4.038
06.17.17 08:30:00 PM	4.921	9.064	4.143
06.17.17 09:00:00 PM	4.973	9.04	4.067
06.17.17 09:30:00 PM	4.999	9.04	4.041
06.17.17 10:00:00 PM	5.102	9.015	3.913
06.17.17 10:30:00 PM	5.205	9.015	3.81
06.17.17 11:00:00 PM	5.565	9.015	3.45
06.17.17 11:30:00 PM	6.458	9.015	2.557
06.18.17 12:00:00 AM	6.611	8.99	2.379
06.18.17 12:30:00 AM	6.99	8.99	2
06.18.17 01:00:00 AM	7.419	8.99	1.571
06.18.17 01:30:00 AM	7.97	8.99	1.02
06.18.17 02:00:00 AM	8.02	8.99	0.97
06.18.17 02:30:00 AM	8.12	9.015	0.895
06.18.17 03:00:00 AM	8.12	9.015	0.895
06.18.17 03:30:00 AM	7.895	9.015	1.12
06.18.17 04:00:00 AM	7.67	9.015	1.345
06.18.17 04:30:00 AM	7.97	9.015	1.045
06.18.17 05:00:00 AM	8.095	9.015	0.92
06.18.17 05:30:00 AM	8.095	9.015	0.92
06.18.17 06:00:00 AM	8.12	9.015	0.895
06.18.17 06:30:00 AM	8.145	9.015	0.87
06.18.17 07:00:00 AM	8.394	9.04	0.646
06.18.17 07:30:00 AM	8.543	9.04	0.497
06.18.17 08:00:00 AM	8.593	9.04	0.447
06.18.17 08:30:00 AM	8.767	9.064	0.297
06.18.17 09:00:00 AM	8.891	9.064	0.173
06.18.17 09:30:00 AM	9.163	9.064	-0.099
06.18.17 10:00:00 AM	9.361	9.089	-0.272
06.18.17 10:30:00 AM	9.485	9.089	-0.396
06.18.17 11:00:00 AM	9.682	9.089	-0.593
06.18.17 11:30:00 AM	9.756	9.114	-0.642
06.18.17 12:00:00 PM	10.001	9.114	-0.887
06.18.17 12:30:00 PM	10.173	9.114	-1.059
06.18.17 01:00:00 PM	10.418	9.114	-1.304
06.18.17 01:30:00 PM	10.761	9.139	-1.622
06.18.17 02:00:00 PM	10.883	9.139	-1.744
06.18.17 02:30:00 PM	11.029	9.139	-1.89
06.18.17 03:00:00 PM	11.151	9.163	-1.988
06.18.17 03:30:00 PM	11.2	9.163	-2.037
06.18.17 04:00:00 PM	11.297	9.163	-2.134
06.18.17 04:30:00 PM	11.078	9.188	-1.89
06.18.17 05:00:00 PM	10.663	9.188	-1.475
06.18.17 05:30:00 PM	10.345	9.188	-1.157
06.18.17 06:00:00 PM	10.222	9.213	-1.009
06.18.17 06:30:00 PM	10.026	9.213	-0.813
06.18.17 07:00:00 PM	9.805	9.213	-0.592
06.18.17 07:30:00 PM	9.706	9.213	-0.493
06.18.17 08:00:00 PM	9.632	9.213	-0.419
06.18.17 08:30:00 PM	9.015	9.238	0.223
06.18.17 09:00:00 PM	8.593	9.238	0.645
06.18.17 09:30:00 PM	8.593	9.213	0.62
06.18.17 10:00:00 PM	8.668	9.238	0.57
06.18.17 10:30:00 PM	8.494	9.238	0.744
06.18.17 11:00:00 PM	8.817	9.238	0.421
06.18.17 11:30:00 PM	8.742	9.238	0.496
06.19.17 12:00:00 AM	8.643	9.238	0.595
06.19.17 12:30:00 AM	8.444	9.238	0.794
06.19.17 01:00:00 AM	8.568	9.238	0.67
06.19.17 01:30:00 AM	8.543	9.262	0.719
06.19.17 02:00:00 AM	8.519	9.262	0.743
06.19.17 02:30:00 AM	8.419	9.262	0.843
06.19.17 03:00:00 AM	8.27	9.262	0.992
06.19.17 03:30:00 AM	8.27	9.262	0.992
06.19.17 04:00:00 AM	8.27	9.262	0.992
06.19.17 04:30:00 AM	8.394	9.262	0.868
06.19.17 05:00:00 AM	8.344	9.262	0.918
06.19.17 05:30:00 AM	8.245	9.262	1.017
06.19.17 06:00:00 AM	8.344	9.287	0.943
06.19.17 06:30:00 AM	8.195	9.287	1.092
06.19.17 07:00:00 AM	8.245	9.287	1.042
06.19.17 07:30:00 AM	8.444	9.287	0.843
06.19.17 08:00:00 AM	8.568	9.287	0.719
06.19.17 08:30:00 AM	8.792	9.287	0.495
06.19.17 09:00:00 AM	9.238	9.287	0.049
06.19.17 09:30:00 AM	9.657	9.312	-0.345
06.19.17 10:00:00 AM	10.1	9.312	-0.788
06.19.17 10:30:00 AM	10.075	9.312	-0.763
06.19.17 11:00:00 AM	10.418	9.312	-1.106
06.19.17 11:30:00 AM	11.102	9.312	-1.79
06.19.17 12:00:00 PM	11.492	9.312	-2.18
06.19.17 12:30:00 PM	12.195	9.312	-2.883
06.19.17 01:00:00 PM	12.195	9.336	-2.859
06.19.17 01:30:00 PM	12.268	9.336	-2.932
06.19.17 02:00:00 PM	12.727	9.336	-3.391
06.19.17 02:30:00 PM	13.016	9.336	-3.68
06.19.17 03:00:00 PM	12.582	9.336	-3.246
06.19.17 03:30:00 PM	12.147	9.336	-2.811
06.19.17 04:00:00 PM	11.565	9.361	-2.204
06.19.17 04:30:00 PM	11.053	9.361	-1.692
06.19.17 05:00:00 PM	10.345	9.361	-0.984
06.19.17 05:30:00 PM	9.213	9.361	0.148
06.19.17 06:00:00 PM	8.593	9.361	0.768
06.19.17 06:30:00 PM	7.97	9.361	1.391
06.19.17 07:00:00 PM	7.569	9.336	1.767
06.19.17 07:30:00 PM	7.619	9.336	1.717
06.19.17 08:00:00 PM	7.945	9.336	1.391
06.19.17 08:30:00 PM	8.195	9.312	1.117
06.19.17 09:00:00 PM	7.494	9.312	1.818
06.19.17 09:30:00 PM	7.469	9.287	1.818
06.19.17 10:00:00 PM	7.444	9.287	1.843
06.19.17 10:30:00 PM	7.795	9.262	1.467
06.19.17 11:00:00 PM	7.619	9.262	1.643
06.19.17 11:30:00 PM	7.167	9.262	2.095
06.20.17 12:00:00 AM	6.56	9.238	2.678
06.20.17 12:30:00 AM	6.408	9.213	2.805
06.20.17 01:00:00 AM	6.331	9.213	2.882
06.20.17 01:30:00 AM	6.255	9.188	2.933
06.20.17 02:00:00 AM	6.611	9.163	2.552
06.20.17 02:30:00 AM	7.041	9.163	2.122
06.20.17 03:00:00 AM	7.318	9.139	1.821
06.20.17 03:30:00 AM	7.116	9.114	1.998
06.20.17 04:00:00 AM	7.066	9.114	2.048
06.20.17 04:30:00 AM	6.839	9.114	2.275
06.20.17 05:00:00 AM	6.712	9.089	2.377
06.20.17 05:30:00 AM	6.458	9.089	2.631
06.20.17 06:00:00 AM	6.204	9.064	2.86
06.20.17 06:30:00 AM	6.179	9.064	2.885
06.20.17 07:00:00 AM	5.975	9.04	3.065
06.20.17 07:30:00 AM	5.616	9.04	3.424
06.20.17 08:00:00 AM	5.36	9.015	3.655
06.20.17 08:30:00 AM	5.872	9.015	3.143
06.20.17 09:00:00 AM	6.636	8.99	2.354
06.20.17 09:30:00 AM	7.419	9.015	1.596
06.20.17 10:00:00 AM	9.04	9.04	0
06.20.17 10:30:00 AM	9.534	9.064	-0.47
06.20.17 11:00:00 AM	10.247	9.064	-1.183
06.20.17 11:30:00 AM	11.516	9.064	-2.452
06.20.17 12:00:00 PM	12.364	9.089	-3.275
06.20.17 12:30:00 PM	12.074	9.089	-2.985
06.20.17 01:00:00 PM	12.074	9.089	-2.985
06.20.17 01:30:00 PM	12.316	9.114	-3.202
06.20.17 02:00:00 PM	12.171	9.114	-3.057
06.20.17 02:30:00 PM	12.219	9.114	-3.105
06.20.17 03:00:00 PM	11.783	9.114	-2.669
06.20.17 03:30:00 PM	11.443	9.139	-2.304
06.20.17 04:00:00 PM	11.2	9.139	-2.061
06.20.17 04:30:00 PM	10.907	9.139	-1.768
06.20.17 05:00:00 PM	10.687	9.139	-1.548
06.20.17 05:30:00 PM	10.418	9.163	-1.255
06.20.17 06:00:00 PM	9.657	9.163	-0.494
06.20.17 06:30:00 PM	9.188	9.139	-0.049
06.20.17 07:00:00 PM	8.941	9.139	0.198
06.20.17 07:30:00 PM	8.792	9.139	0.347
06.20.17 08:00:00 PM	8.866	9.139	0.273
06.20.17 08:30:00 PM	8.841	9.139	0.298
06.20.17 09:00:00 PM	8.717	9.139	0.422
06.20.17 09:30:00 PM	8.469	9.114	0.645
06.20.17 10:00:00 PM	8.245	9.114	0.869
06.20.17 10:30:00 PM	8.095	9.114	1.019
06.20.17 11:00:00 PM	8.02	9.114	1.094
06.20.17 11:30:00 PM	8.045	9.139	1.094
06.21.17 12:00:00 AM	8.17	9.139	0.969
06.21.17 12:30:00 AM	8.07	9.139	1.069
06.21.17 01:00:00 AM	7.845	9.163	1.318
06.21.17 01:30:00 AM	7.619	9.139	1.52
06.21.17 02:00:00 AM	7.72	9.139	1.419
06.21.17 02:30:00 AM	7.87	9.163	1.293
06.21.17 03:00:00 AM	7.845	9.188	1.343
06.21.17 03:30:00 AM	7.795	9.188	1.393
06.21.17 04:00:00 AM	7.795	9.213	1.418
06.21.17 04:30:00 AM	7.67	9.213	1.543
06.21.17 05:00:00 AM	7.519	9.213	1.694
06.21.17 05:30:00 AM	7.544	9.238	1.694
06.21.17 06:00:00 AM	7.368	9.238	1.87
06.21.17 06:30:00 AM	7.242	9.238	1.996
06.21.17 07:00:00 AM	7.217	9.238	2.021
06.21.17 07:30:00 AM	7.116	9.238	2.122
06.21.17 08:00:00 AM	7.116	9.238	2.122
06.21.17 08:30:00 AM	7.217	9.262	2.045
06.21.17 09:00:00 AM	7.619	9.238	1.619
06.21.17 09:30:00 AM	8.519	9.262	0.743
06.21.17 10:00:00 AM	9.361	9.238	-0.123
06.21.17 10:30:00 AM	10.32	9.262	-1.058
06.21.17 11:00:00 AM	11.005	9.262	-1.743
06.21.17 11:30:00 AM	11.467	9.312	-2.155
06.21.17 12:00:00 PM	11.492	9.336	-2.156
06.21.17 12:30:00 PM	11.248	9.312	-1.936
06.21.17 01:00:00 PM	11.467	9.361	-2.106
06.21.17 01:30:00 PM	11.321	9.41	-1.911
06.21.17 02:00:00 PM	10.687	9.361	-1.326
06.21.17 02:30:00 PM	10.81	9.386	-1.424
06.21.17 03:00:00 PM	10.834	9.386	-1.448
06.21.17 03:30:00 PM	10.418	9.336	-1.082
06.21.17 04:00:00 PM	9.977	9.361	-0.616
06.21.17 04:30:00 PM	9.805	9.386	-0.419
06.21.17 05:00:00 PM	9.608	9.361	-0.247
06.21.17 05:30:00 PM	9.336	9.386	0.05
06.21.17 06:00:00 PM	9.312	9.386	0.074
06.21.17 06:30:00 PM	9.435	9.361	-0.074
06.21.17 07:00:00 PM	9.509	9.386	-0.123
06.21.17 07:30:00 PM	9.312	9.386	0.074
06.21.17 08:00:00 PM	9.336	9.435	0.099
06.21.17 08:30:00 PM	9.312	9.41	0.098
06.21.17 09:00:00 PM	9.262	9.435	0.173
06.21.17 09:30:00 PM	8.941	9.435	0.494
06.21.17 10:00:00 PM	8.866	9.509	0.643
06.21.17 10:30:00 PM	9.089	9.509	0.42
06.21.17 11:00:00 PM	9.139	9.485	0.346
06.21.17 11:30:00 PM	9.188	9.509	0.321
06.22.17 12:00:00 AM	9.287	9.509	0.222
06.22.17 12:30:00 AM	9.262	9.558	0.296
06.22.17 01:00:00 AM	9.287	9.485	0.198
06.22.17 01:30:00 AM	9.312	9.485	0.173
06.22.17 02:00:00 AM	9.41	9.46	0.05
06.22.17 02:30:00 AM	9.361	9.46	0.099
06.22.17 03:00:00 AM	9.435	9.46	0.025
06.22.17 03:30:00 AM	9.485	9.46	-0.025
06.22.17 04:00:00 AM	9.46	9.46	0
06.22.17 04:30:00 AM	9.46	9.46	0
06.22.17 05:00:00 AM	9.608	9.46	-0.148
06.22.17 05:30:00 AM	9.583	9.46	-0.123
06.22.17 06:00:00 AM	9.632	9.435	-0.197
06.22.17 06:30:00 AM	9.829	9.46	-0.369
06.22.17 07:00:00 AM	9.977	9.46	-0.517
06.22.17 07:30:00 AM	10.198	9.46	-0.738
06.22.17 08:00:00 AM	10.345	9.46	-0.885
06.22.17 08:30:00 AM	10.345	9.485	-0.86
06.22.17 09:00:00 AM	10.394	9.485	-0.909
06.22.17 09:30:00 AM	10.663	9.485	-1.178
06.22.17 10:00:00 AM	11.053	9.485	-1.568
06.22.17 10:30:00 AM	11.2	9.485	-1.715
06.22.17 11:00:00 AM	11.2	9.485	-1.715
06.22.17 11:30:00 AM	11.419	9.485	-1.934
06.22.17 12:00:00 PM	11.516	9.485	-2.031
06.22.17 12:30:00 PM	11.686	9.485	-2.201
06.22.17 01:00:00 PM	11.807	9.534	-2.273
06.22.17 01:30:00 PM	11.929	9.534	-2.395
06.22.17 02:00:00 PM	12.147	9.509	-2.638
06.22.17 02:30:00 PM	12.364	9.534	-2.83
06.22.17 03:00:00 PM	12.364	9.534	-2.83
06.22.17 03:30:00 PM	12.243	9.534	-2.709
06.22.17 04:00:00 PM	11.904	9.558	-2.346
06.22.17 04:30:00 PM	11.637	9.583	-2.054
06.22.17 05:00:00 PM	11.565	9.558	-2.007
06.22.17 05:30:00 PM	11.467	9.558	-1.909
06.22.17 06:00:00 PM	11.565	9.558	-2.007
06.22.17 06:30:00 PM	11.613	9.558	-2.055
06.22.17 07:00:00 PM	11.248	9.558	-1.69
06.22.17 07:30:00 PM	10.98	9.558	-1.422
06.22.17 08:00:00 PM	10.883	9.558	-1.325
06.22.17 08:30:00 PM	10.785	9.558	-1.227
06.22.17 09:00:00 PM	10.761	9.558	-1.203
06.22.17 09:30:00 PM	10.834	9.558	-1.276
06.22.17 10:00:00 PM	10.932	9.558	-1.374
06.22.17 10:30:00 PM	11.029	9.558	-1.471
06.22.17 11:00:00 PM	11.127	9.558	-1.569
06.22.17 11:30:00 PM	11.2	9.558	-1.642
06.23.17 12:00:00 AM	11.151	9.583	-1.568
06.23.17 12:30:00 AM	11.127	9.583	-1.544
06.23.17 01:00:00 AM	11.127	9.583	-1.544
06.23.17 01:30:00 AM	11.102	9.583	-1.519
06.23.17 02:00:00 AM	11.102	9.583	-1.519
06.23.17 02:30:00 AM	11.127	9.583	-1.544
06.23.17 03:00:00 AM	11.053	9.583	-1.47
06.23.17 03:30:00 AM	11.078	9.583	-1.495
06.23.17 04:00:00 AM	11.127	9.583	-1.544
06.23.17 04:30:00 AM	11.224	9.608	-1.616
06.23.17 05:00:00 AM	11.273	9.608	-1.665
06.23.17 05:30:00 AM	11.37	9.608	-1.762
06.23.17 06:00:00 AM	11.419	9.608	-1.811
06.23.17 06:30:00 AM	11.394	9.608	-1.786
06.23.17 07:00:00 AM	11.467	9.608	-1.859
06.23.17 07:30:00 AM	11.516	9.608	-1.908
06.23.17 08:00:00 AM	11.662	9.608	-2.054
06.23.17 08:30:00 AM	11.759	9.608	-2.151
06.23.17 09:00:00 AM	11.88	9.608	-2.272
06.23.17 09:30:00 AM	11.953	9.608	-2.345
06.23.17 10:00:00 AM	11.929	9.632	-2.297
06.23.17 10:30:00 AM	11.977	9.632	-2.345
06.23.17 11:00:00 AM	12.122	9.632	-2.49
06.23.17 11:30:00 AM	12.195	9.632	-2.563
06.23.17 12:00:00 PM	12.243	9.632	-2.611
06.23.17 12:30:00 PM	12.389	9.657	-2.732
06.23.17 01:00:00 PM	12.606	9.657	-2.949
06.23.17 01:30:00 PM	12.871	9.657	-3.214
06.23.17 02:00:00 PM	13.064	9.657	-3.407
06.23.17 02:30:00 PM	13.449	9.657	-3.792
06.23.17 03:00:00 PM	13.546	9.657	-3.889
06.23.17 03:30:00 PM	13.497	9.682	-3.815
06.23.17 04:00:00 PM	13.401	9.682	-3.719
06.23.17 04:30:00 PM	13.473	9.682	-3.791
06.23.17 05:00:00 PM	13.594	9.682	-3.912
06.23.17 05:30:00 PM	13.257	9.682	-3.575
06.23.17 06:00:00 PM	12.799	9.682	-3.117
06.23.17 06:30:00 PM	12.437	9.682	-2.755
06.23.17 07:00:00 PM	12.074	9.682	-2.392
06.23.17 07:30:00 PM	12.147	9.682	-2.465
06.23.17 08:00:00 PM	12.147	9.682	-2.465
06.23.17 08:30:00 PM	11.904	9.682	-2.222
06.23.17 09:00:00 PM	11.832	9.682	-2.15
06.23.17 09:30:00 PM	11.565	9.706	-1.859
06.23.17 10:00:00 PM	11.224	9.706	-1.518
06.23.17 10:30:00 PM	11.321	9.78	-1.541
06.23.17 11:00:00 PM	11.759	9.78	-1.979
06.23.17 11:30:00 PM	11.71	9.78	-1.93
06.24.17 12:00:00 AM	11.71	9.756	-1.954
06.24.17 12:30:00 AM	11.686	9.756	-1.93
06.24.17 01:00:00 AM	11.589	9.756	-1.833
06.24.17 01:30:00 AM	11.54	9.756	-1.784
06.24.17 02:00:00 AM	11.346	9.805	-1.541
06.24.17 02:30:00 AM	11.37	9.805	-1.565
06.24.17 03:00:00 AM	11.346	9.756	-1.59
06.24.17 03:30:00 AM	11.37	9.78	-1.59
06.24.17 04:00:00 AM	11.248	9.829	-1.419
06.24.17 04:30:00 AM	11.151	9.854	-1.297
06.24.17 05:00:00 AM	11.175	9.829	-1.346
06.24.17 05:30:00 AM	11.175	9.854	-1.321
06.24.17 06:00:00 AM	11.029	9.879	-1.15
06.24.17 06:30:00 AM	10.956	9.854	-1.102
06.24.17 07:00:00 AM	10.858	9.854	-1.004
06.24.17 07:30:00 AM	10.541	9.854	-0.687
06.24.17 08:00:00 AM	10.418	9.903	-0.515
06.24.17 08:30:00 AM	10.418	9.903	-0.515
06.24.17 09:00:00 AM	10.565	9.879	-0.686
06.24.17 09:30:00 AM	10.638	9.903	-0.735
06.24.17 10:00:00 AM	10.59	9.928	-0.662
06.24.17 10:30:00 AM	10.59	9.928	-0.662
06.24.17 11:00:00 AM	10.59	9.952	-0.638
06.24.17 11:30:00 AM	11.248	9.952	-1.296
06.24.17 12:00:00 PM	11.273	9.977	-1.296
06.24.17 12:30:00 PM	11.321	9.977	-1.344
06.24.17 01:00:00 PM	11.297	9.977	-1.32
06.24.17 01:30:00 PM	10.956	10.001	-0.955
06.24.17 02:00:00 PM	10.687	10.001	-0.686
06.24.17 02:30:00 PM	10.222	10.001	-0.221
06.24.17 03:00:00 PM	10.198	10.001	-0.197
06.24.17 03:30:00 PM	10.149	10.001	-0.148
06.24.17 04:00:00 PM	10.222	10.001	-0.221
06.24.17 04:30:00 PM	10.026	10.026	0
06.24.17 05:00:00 PM	9.336	10.051	0.715
06.24.17 05:30:00 PM	8.394	10.051	1.657
06.24.17 06:00:00 PM	7.945	10.075	2.13
06.24.17 06:30:00 PM	7.72	10.075	2.355
06.24.17 07:00:00 PM	7.645	10.075	2.43
06.24.17 07:30:00 PM	7.318	10.075	2.757
06.24.17 08:00:00 PM	7.318	10.075	2.757
06.24.17 08:30:00 PM	7.393	10.075	2.682
06.24.17 09:00:00 PM	7.469	10.1	2.631
06.24.17 09:30:00 PM	7.368	10.1	2.732
06.24.17 10:00:00 PM	7.268	10.1	2.832
06.24.17 10:30:00 PM	7.091	10.1	3.009
06.24.17 11:00:00 PM	6.99	10.1	3.11
06.24.17 11:30:00 PM	6.99	10.1	3.11
06.25.17 12:00:00 AM	7.167	10.124	2.957
06.25.17 12:30:00 AM	7.268	10.124	2.856
06.25.17 01:00:00 AM	7.444	10.1	2.656
06.25.17 01:30:00 AM	7.544	10.1	2.556
06.25.17 02:00:00 AM	7.494	10.124	2.63
06.25.17 02:30:00 AM	7.494	10.1	2.606
06.25.17 03:00:00 AM	7.419	10.1	2.681
06.25.17 03:30:00 AM	7.217	10.051	2.834
06.25.17 04:00:00 AM	7.116	10.001	2.885
06.25.17 04:30:00 AM	7.318	10.075	2.757
06.25.17 05:00:00 AM	7.343	10.1	2.757
06.25.17 05:30:00 AM	7.091	10.1	3.009
06.25.17 06:00:00 AM	6.306	10.124	3.818
06.25.17 06:30:00 AM	5.745	10.051	4.306
06.25.17 07:00:00 AM	5.514	10.001	4.487
06.25.17 07:30:00 AM	5.385	9.977	4.592
06.25.17 08:00:00 AM	6.051	9.952	3.901
06.25.17 08:30:00 AM	6.914	9.952	3.038
06.25.17 09:00:00 AM	7.97	9.928	1.958
06.25.17 09:30:00 AM	8.394	9.928	1.534
06.25.17 10:00:00 AM	8.419	9.928	1.509
06.25.17 10:30:00 AM	10.198	9.903	-0.295
06.25.17 11:00:00 AM	10.516	9.903	-0.613
06.25.17 11:30:00 AM	9.46	9.903	0.443
06.25.17 12:00:00 PM	9.78	9.903	0.123
06.25.17 12:30:00 PM	9.015	9.903	0.888
06.25.17 01:00:00 PM	9.46	9.903	0.443
06.25.17 01:30:00 PM	10.467	9.903	-0.564
06.25.17 02:00:00 PM	10.785	9.903	-0.882
06.25.17 02:30:00 PM	11.321	9.903	-1.418
06.25.17 03:00:00 PM	11.248	9.903	-1.345
06.25.17 03:30:00 PM	10.59	9.952	-0.638
06.25.17 04:00:00 PM	10.418	9.952	-0.466
06.25.17 04:30:00 PM	9.731	9.977	0.246
06.25.17 05:00:00 PM	9.41	10.001	0.591
06.25.17 05:30:00 PM	8.941	9.977	1.036
06.25.17 06:00:00 PM	8.369	9.952	1.583
06.25.17 06:30:00 PM	7.845	9.952	2.107
06.25.17 07:00:00 PM	7.645	9.977	2.332
06.25.17 07:30:00 PM	7.544	10.001	2.457
06.25.17 08:00:00 PM	7.318	10.051	2.733
06.25.17 08:30:00 PM	6.99	10.075	3.085
06.25.17 09:00:00 PM	6.712	10.051	3.339
06.25.17 09:30:00 PM	6.585	10.001	3.416
06.25.17 10:00:00 PM	6.458	10.026	3.568
06.25.17 10:30:00 PM	6.026	10.051	4.025
06.25.17 11:00:00 PM	5.872	9.977	4.105
06.25.17 11:30:00 PM	5.642	9.928	4.286
06.26.17 12:00:00 AM	5.693	9.903	4.21
06.26.17 12:30:00 AM	5.36	9.879	4.519
06.26.17 01:00:00 AM	4.947	9.829	4.882
06.26.17 01:30:00 AM	4.454	9.78	5.326
06.26.17 02:00:00 AM	4.48	9.78	5.3
06.26.17 02:30:00 AM	4.895	9.756	4.861
06.26.17 03:00:00 AM	5.36	9.731	4.371
06.26.17 03:30:00 AM	5.231	9.706	4.475
06.26.17 04:00:00 AM	5.05	9.706	4.656
06.26.17 04:30:00 AM	5.024	9.682	4.658
06.26.17 05:00:00 AM	4.61	9.657	5.047
06.26.17 05:30:00 AM	3.906	9.632	5.726
06.26.17 06:00:00 AM	3.932	9.608	5.676
06.26.17 06:30:00 AM	4.376	9.583	5.207
06.26.17 07:00:00 AM	4.48	9.558	5.078
06.26.17 07:30:00 AM	4.506	9.558	5.052
06.26.17 08:00:00 AM	4.714	9.534	4.82
06.26.17 08:30:00 AM	5.257	9.509	4.252
06.26.17 09:00:00 AM	5.821	9.534	3.713
06.26.17 09:30:00 AM	6.611	9.534	2.923
06.26.17 10:00:00 AM	7.368	9.558	2.19
06.26.17 10:30:00 AM	7.845	9.558	1.713
06.26.17 11:00:00 AM	8.319	9.558	1.239
06.26.17 11:30:00 AM	8.568	9.558	0.99
06.26.17 12:00:00 PM	8.618	9.558	0.94
06.26.17 12:30:00 PM	8.494	9.558	1.064
06.26.17 01:00:00 PM	8.693	9.558	0.865
06.26.17 01:30:00 PM	8.817	9.534	0.717
06.26.17 02:00:00 PM	8.941	9.558	0.617
06.26.17 02:30:00 PM	9.089	9.558	0.469
06.26.17 03:00:00 PM	8.841	9.558	0.717
06.26.17 03:30:00 PM	9.015	9.558	0.543
06.26.17 04:00:00 PM	7.97	9.558	1.588
06.26.17 04:30:00 PM	7.242	9.534	2.292
06.26.17 05:00:00 PM	6.687	9.534	2.847
06.26.17 05:30:00 PM	6.179	9.534	3.355
06.26.17 06:00:00 PM	5.334	9.509	4.175
06.26.17 06:30:00 PM	4.869	9.485	4.616
06.26.17 07:00:00 PM	4.792	9.46	4.668
06.26.17 07:30:00 PM	4.818	9.435	4.617
06.26.17 08:00:00 PM	5.308	9.435	4.127
06.26.17 08:30:00 PM	5.745	9.41	3.665
06.26.17 09:00:00 PM	5.591	9.386	3.795
06.26.17 09:30:00 PM	5.102	9.361	4.259
06.26.17 10:00:00 PM	5.257	9.361	4.104
06.26.17 10:30:00 PM	5.179	9.361	4.182
06.26.17 11:00:00 PM	5.076	9.336	4.26
06.26.17 11:30:00 PM	4.818	9.336	4.518
06.27.17 12:00:00 AM	4.818	9.336	4.518
06.27.17 12:30:00 AM	4.584	9.336	4.752
06.27.17 01:00:00 AM	4.532	9.312	4.78
06.27.17 01:30:00 AM	4.194	9.287	5.093
06.27.17 02:00:00 AM	4.168	9.262	5.094
06.27.17 02:30:00 AM	4.089	9.238	5.149
06.27.17 03:00:00 AM	4.194	9.213	5.019
06.27.17 03:30:00 AM	3.958	9.213	5.255
06.27.17 04:00:00 AM	3.406	9.163	5.757
06.27.17 04:30:00 AM	2.744	9.114	6.37
06.27.17 05:00:00 AM	3.089	9.089	6
06.27.17 05:30:00 AM	2.717	9.064	6.347
06.27.17 06:00:00 AM	2.61	9.015	6.405
06.27.17 06:30:00 AM	2.316	8.99	6.674
06.27.17 07:00:00 AM	2.262	8.965	6.703
06.27.17 07:30:00 AM	2.182	8.941	6.759
06.27.17 08:00:00 AM	2.45	8.891	6.441
06.27.17 08:30:00 AM	3.854	8.866	5.012
06.27.17 09:00:00 AM	4.844	8.866	4.022
06.27.17 09:30:00 AM	5.514	8.916	3.402
06.27.17 10:00:00 AM	5.462	8.916	3.454
06.27.17 10:30:00 AM	6.204	8.941	2.737
06.27.17 11:00:00 AM	7.645	8.941	1.296
06.27.17 11:30:00 AM	7.97	8.965	0.995
06.27.17 12:00:00 PM	8.195	8.965	0.77
06.27.17 12:30:00 PM	8.717	8.99	0.273
06.27.17 01:00:00 PM	9.114	8.99	-0.124
06.27.17 01:30:00 PM	9.312	9.015	-0.297
06.27.17 02:00:00 PM	9.312	9.015	-0.297
06.27.17 02:30:00 PM	9.139	9.015	-0.124
06.27.17 03:00:00 PM	8.817	9.04	0.223
06.27.17 03:30:00 PM	8.593	9.015	0.422
06.27.17 04:00:00 PM	7.945	9.04	1.095
06.27.17 04:30:00 PM	7.419	9.04	1.621
06.27.17 05:00:00 PM	6.382	9.04	2.658
06.27.17 05:30:00 PM	5.847	9.015	3.168
06.27.17 06:00:00 PM	5.668	9.015	3.347
06.27.17 06:30:00 PM	5.539	8.99	3.451
06.27.17 07:00:00 PM	5.488	8.965	3.477
06.27.17 07:30:00 PM	5.437	8.941	3.504
06.27.17 08:00:00 PM	5.282	8.965	3.683
06.27.17 08:30:00 PM	5.36	8.941	3.581
06.27.17 09:00:00 PM	5.719	8.916	3.197
06.27.17 09:30:00 PM	6	8.891	2.891
06.27.17 10:00:00 PM	6.026	8.891	2.865
06.27.17 10:30:00 PM	5.745	8.891	3.146
06.27.17 11:00:00 PM	5.591	8.891	3.3
06.27.17 11:30:00 PM	5.821	8.866	3.045
06.28.17 12:00:00 AM	5.668	8.866	3.198
06.28.17 12:30:00 AM	5.719	8.866	3.147
06.28.17 01:00:00 AM	5.514	8.891	3.377
06.28.17 01:30:00 AM	5.488	8.891	3.403
06.28.17 02:00:00 AM	5.076	8.891	3.815
06.28.17 02:30:00 AM	4.324	8.891	4.567
06.28.17 03:00:00 AM	3.485	8.841	5.356
06.28.17 03:30:00 AM	3.036	8.817	5.781
06.28.17 04:00:00 AM	2.823	8.792	5.969
06.28.17 04:30:00 AM	2.664	8.767	6.103
06.28.17 05:00:00 AM	2.289	8.717	6.428
06.28.17 05:30:00 AM	2.182	8.693	6.511
06.28.17 06:00:00 AM	1.994	8.643	6.649
06.28.17 06:30:00 AM	2.021	8.618	6.597
06.28.17 07:00:00 AM	1.643	8.593	6.95
06.28.17 07:30:00 AM	1.262	8.568	7.306
06.28.17 08:00:00 AM	1.425	8.519	7.094
06.28.17 08:30:00 AM	2.128	8.494	6.366
06.28.17 09:00:00 AM	3.301	8.469	5.168
06.28.17 09:30:00 AM	4.947	8.469	3.522
06.28.17 10:00:00 AM	7.343	8.494	1.151
06.28.17 10:30:00 AM	8.99	8.494	-0.496
06.28.17 11:00:00 AM	11.346	8.519	-2.827
06.28.17 11:30:00 AM	12.122	8.543	-3.579
06.28.17 12:00:00 PM	12.703	8.568	-4.135
06.28.17 12:30:00 PM	12.074	8.593	-3.481
06.28.17 01:00:00 PM	11.807	8.618	-3.189
06.28.17 01:30:00 PM	11.759	8.618	-3.141
06.28.17 02:00:00 PM	11.613	8.643	-2.97
06.28.17 02:30:00 PM	11.443	8.643	-2.8
06.28.17 03:00:00 PM	10.785	8.668	-2.117
06.28.17 03:30:00 PM	10.614	8.693	-1.921
06.28.17 04:00:00 PM	10.075	8.693	-1.382
06.28.17 04:30:00 PM	9.262	8.717	-0.545
06.28.17 05:00:00 PM	8.245	8.717	0.472
06.28.17 05:30:00 PM	6.965	8.693	1.728
06.28.17 06:00:00 PM	6.051	8.693	2.642
06.28.17 06:30:00 PM	5.668	8.668	3
06.28.17 07:00:00 PM	5.385	8.668	3.283
06.28.17 07:30:00 PM	5.308	8.668	3.36
06.28.17 08:00:00 PM	4.921	8.643	3.722
06.28.17 08:30:00 PM	4.61	8.618	4.008
06.28.17 09:00:00 PM	4.454	8.618	4.164
06.28.17 09:30:00 PM	4.35	8.593	4.243
06.28.17 10:00:00 PM	4.011	8.568	4.557
06.28.17 10:30:00 PM	3.67	8.543	4.873
06.28.17 11:00:00 PM	3.327	8.519	5.192
06.28.17 11:30:00 PM	3.168	8.494	5.326
06.29.17 12:00:00 AM	2.983	8.469	5.486
06.29.17 12:30:00 AM	3.089	8.444	5.355
06.29.17 01:00:00 AM	3.301	8.444	5.143
06.29.17 01:30:00 AM	3.512	8.419	4.907
06.29.17 02:00:00 AM	3.459	8.394	4.935
06.29.17 02:30:00 AM	3.459	8.369	4.91
06.29.17 03:00:00 AM	3.433	8.394	4.961
06.29.17 03:30:00 AM	3.406	8.369	4.963
06.29.17 04:00:00 AM	3.168	8.319	5.151
06.29.17 04:30:00 AM	3.009	8.319	5.31
06.29.17 05:00:00 AM	2.823	8.27	5.447
06.29.17 05:30:00 AM	2.717	8.27	5.553
06.29.17 06:00:00 AM	2.664	8.245	5.581
06.29.17 06:30:00 AM	2.584	8.22	5.636
06.29.17 07:00:00 AM	2.289	8.195	5.906
06.29.17 07:30:00 AM	2.289	8.17	5.881
06.29.17 08:00:00 AM	2.289	8.145	5.856
06.29.17 08:30:00 AM	2.717	8.145	5.428
06.29.17 09:00:00 AM	3.854	8.12	4.266
06.29.17 09:30:00 AM	5.796	8.12	2.324
06.29.17 10:00:00 AM	7.895	8.145	0.25
06.29.17 10:30:00 AM	8.568	8.145	-0.423
06.29.17 11:00:00 AM	9.854	8.195	-1.659
06.29.17 11:30:00 AM	10.98	8.22	-2.76
06.29.17 12:00:00 PM	12.074	8.22	-3.854
06.29.17 12:30:00 PM	11.224	8.27	-2.954
06.29.17 01:00:00 PM	10.663	8.295	-2.368
06.29.17 01:30:00 PM	10.956	8.295	-2.661
06.29.17 02:00:00 PM	10.932	8.319	-2.613
06.29.17 02:30:00 PM	10.81	8.344	-2.466
06.29.17 03:00:00 PM	10.149	8.344	-1.805
06.29.17 03:30:00 PM	9.386	8.369	-1.017
06.29.17 04:00:00 PM	8.792	8.394	-0.398
06.29.17 04:30:00 PM	7.87	8.394	0.524
06.29.17 05:00:00 PM	6.864	8.394	1.53
06.29.17 05:30:00 PM	6.077	8.394	2.317
06.29.17 06:00:00 PM	5.539	8.394	2.855
06.29.17 06:30:00 PM	5.024	8.369	3.345
06.29.17 07:00:00 PM	4.714	8.344	3.63
06.29.17 07:30:00 PM	4.584	8.319	3.735
06.29.17 08:00:00 PM	4.48	8.319	3.839
06.29.17 08:30:00 PM	4.272	8.295	4.023
06.29.17 09:00:00 PM	4.194	8.27	4.076
06.29.17 09:30:00 PM	3.958	8.245	4.287
06.29.17 10:00:00 PM	3.985	8.22	4.235
06.29.17 10:30:00 PM	3.932	8.195	4.263
06.29.17 11:00:00 PM	3.749	8.195	4.446
06.29.17 11:30:00 PM	3.564	8.17	4.606
06.30.17 12:00:00 AM	3.38	8.12	4.74
06.30.17 12:30:00 AM	3.089	8.095	5.006
06.30.17 01:00:00 AM	3.089	8.07	4.981
06.30.17 01:30:00 AM	3.327	8.02	4.693
06.30.17 02:00:00 AM	3.38	8.045	4.665
06.30.17 02:30:00 AM	3.327	8.02	4.693
06.30.17 03:00:00 AM	3.38	7.995	4.615
06.30.17 03:30:00 AM	3.354	7.995	4.641
06.30.17 04:00:00 AM	3.116	7.945	4.829
06.30.17 04:30:00 AM	2.797	7.92	5.123
06.30.17 05:00:00 AM	2.396	7.92	5.524
06.30.17 05:30:00 AM	2.209	7.895	5.686
06.30.17 06:00:00 AM	2.236	7.87	5.634
06.30.17 06:30:00 AM	2.37	7.87	5.5
06.30.17 07:00:00 AM	3.327	7.845	4.518
06.30.17 07:30:00 AM	3.354	7.845	4.491
06.30.17 08:00:00 AM	3.248	7.82	4.572
06.30.17 08:30:00 AM	4.168	7.845	3.677
06.30.17 09:00:00 AM	4.74	7.87	3.13
06.30.17 09:30:00 AM	4.973	7.895	2.922
06.30.17 10:00:00 AM	5.205	7.945	2.74
06.30.17 10:30:00 AM	5.282	7.945	2.663
06.30.17 11:00:00 AM	5.385	7.97	2.585
06.30.17 11:30:00 AM	5.821	7.995	2.174
06.30.17 12:00:00 PM	5.77	7.995	2.225
06.30.17 12:30:00 PM	6.102	8.02	1.918
06.30.17 01:00:00 PM	6.331	8.045	1.714
06.30.17 01:30:00 PM	6.661	8.045	1.384
06.30.17 02:00:00 PM	6.763	8.07	1.307
06.30.17 02:30:00 PM	6.788	8.095	1.307
06.30.17 03:00:00 PM	6.864	8.12	1.256
06.30.17 03:30:00 PM	7.192	8.12	0.928
06.30.17 04:00:00 PM	7.242	8.145	0.903
06.30.17 04:30:00 PM	6.94	8.17	1.23
06.30.17 05:00:00 PM	6.585	8.17	1.585
06.30.17 05:30:00 PM	6.179	8.17	1.991
06.30.17 06:00:00 PM	6.153	8.195	2.042
06.30.17 06:30:00 PM	6.56	8.195	1.635
06.30.17 07:00:00 PM	7.142	8.22	1.078
06.30.17 07:30:00 PM	7.293	8.22	0.927
06.30.17 08:00:00 PM	7.368	8.245	0.877
06.30.17 08:30:00 PM	7.343	8.245	0.902
06.30.17 09:00:00 PM	7.318	8.27	0.952
06.30.17 09:30:00 PM	7.217	8.27	1.053
06.30.17 10:00:00 PM	7.091	8.295	1.204
06.30.17 10:30:00 PM	6.94	8.295	1.355
06.30.17 11:00:00 PM	6.864	8.319	1.455
06.30.17 11:30:00 PM	6.839	8.319	1.48
07.01.17 12:00:00 AM	6.839	8.319	1.48
07.01.17 12:30:00 AM	6.813	8.344	1.531
07.01.17 01:00:00 AM	6.914	8.344	1.43
07.01.17 01:30:00 AM	6.889	8.369	1.48
07.01.17 02:00:00 AM	6.788	8.369	1.581
07.01.17 02:30:00 AM	6.712	8.369	1.657
07.01.17 03:00:00 AM	6.661	8.369	1.708
07.01.17 03:30:00 AM	6.914	8.394	1.48
07.01.17 04:00:00 AM	6.965	8.394	1.429
07.01.17 04:30:00 AM	7.167	8.394	1.227
07.01.17 05:00:00 AM	7.217	8.419	1.202
07.01.17 05:30:00 AM	7.368	8.419	1.051
07.01.17 06:00:00 AM	7.469	8.419	0.95
07.01.17 06:30:00 AM	7.619	8.444	0.825
07.01.17 07:00:00 AM	7.67	8.444	0.774
07.01.17 07:30:00 AM	7.82	8.444	0.624
07.01.17 08:00:00 AM	8.02	8.444	0.424
07.01.17 08:30:00 AM	8.145	8.469	0.324
07.01.17 09:00:00 AM	8.344	8.469	0.125
07.01.17 09:30:00 AM	8.469	8.469	0
07.01.17 10:00:00 AM	8.668	8.469	-0.199
07.01.17 10:30:00 AM	9.015	8.494	-0.521
07.01.17 11:00:00 AM	9.361	8.494	-0.867
07.01.17 11:30:00 AM	9.756	8.519	-1.237
07.01.17 12:00:00 PM	10.001	8.519	-1.482
07.01.17 12:30:00 PM	10.271	8.519	-1.752
07.01.17 01:00:00 PM	10.541	8.543	-1.998
07.01.17 01:30:00 PM	10.663	8.543	-2.12
07.01.17 02:00:00 PM	10.785	8.568	-2.217
07.01.17 02:30:00 PM	10.858	8.568	-2.29
07.01.17 03:00:00 PM	10.932	8.568	-2.364
07.01.17 03:30:00 PM	10.858	8.593	-2.265
07.01.17 04:00:00 PM	10.858	8.593	-2.265
07.01.17 04:30:00 PM	10.858	8.593	-2.265
07.01.17 05:00:00 PM	10.785	8.618	-2.167
07.01.17 05:30:00 PM	10.687	8.618	-2.069
07.01.17 06:00:00 PM	10.687	8.643	-2.044
07.01.17 06:30:00 PM	10.687	8.643	-2.044
07.01.17 07:00:00 PM	10.736	8.643	-2.093
07.01.17 07:30:00 PM	10.81	8.668	-2.142
07.01.17 08:00:00 PM	10.956	8.668	-2.288
07.01.17 08:30:00 PM	11.005	8.693	-2.312
07.01.17 09:00:00 PM	11.151	8.693	-2.458
07.01.17 09:30:00 PM	11.248	8.717	-2.531
07.01.17 10:00:00 PM	11.2	8.717	-2.483
07.01.17 10:30:00 PM	11.248	8.742	-2.506
07.01.17 11:00:00 PM	11.175	8.742	-2.433
07.01.17 11:30:00 PM	10.614	8.817	-1.797
07.02.17 12:00:00 AM	10.1	8.817	-1.283
07.02.17 12:30:00 AM	9.706	8.792	-0.914
07.02.17 01:00:00 AM	9.41	8.817	-0.593
07.02.17 01:30:00 AM	9.46	8.817	-0.643
07.02.17 02:00:00 AM	9.583	8.817	-0.766
07.02.17 02:30:00 AM	9.558	8.817	-0.741
07.02.17 03:00:00 AM	9.509	8.841	-0.668
07.02.17 03:30:00 AM	9.485	8.841	-0.644
07.02.17 04:00:00 AM	9.509	8.841	-0.668
07.02.17 04:30:00 AM	9.485	8.841	-0.644
07.02.17 05:00:00 AM	9.509	8.866	-0.643
07.02.17 05:30:00 AM	9.509	8.866	-0.643
07.02.17 06:00:00 AM	9.435	8.866	-0.569
07.02.17 06:30:00 AM	9.41	8.866	-0.544
07.02.17 07:00:00 AM	9.262	8.866	-0.396
07.02.17 07:30:00 AM	9.262	8.891	-0.371
07.02.17 08:00:00 AM	9.188	8.891	-0.297
07.02.17 08:30:00 AM	9.04	8.891	-0.149
07.02.17 09:00:00 AM	9.015	8.891	-0.124
07.02.17 09:30:00 AM	9.163	8.916	-0.247
07.02.17 10:00:00 AM	9.287	8.916	-0.371
07.02.17 10:30:00 AM	9.558	8.916	-0.642
07.02.17 11:00:00 AM	9.632	8.916	-0.716
07.02.17 11:30:00 AM	9.805	8.916	-0.889
07.02.17 12:00:00 PM	10.173	8.941	-1.232
07.02.17 12:30:00 PM	10.638	8.941	-1.697
07.02.17 01:00:00 PM	10.883	8.941	-1.942
07.02.17 01:30:00 PM	10.834	8.965	-1.869
07.02.17 02:00:00 PM	10.883	8.965	-1.918
07.02.17 02:30:00 PM	11.321	8.965	-2.356
07.02.17 03:00:00 PM	11.151	8.965	-2.186
07.02.17 03:30:00 PM	11.102	8.99	-2.112
07.02.17 04:00:00 PM	10.834	8.99	-1.844
07.02.17 04:30:00 PM	10.516	8.99	-1.526
07.02.17 05:00:00 PM	10.394	9.015	-1.379
07.02.17 05:30:00 PM	10.296	9.015	-1.281
07.02.17 06:00:00 PM	10.198	9.015	-1.183
07.02.17 06:30:00 PM	10.075	9.04	-1.035
07.02.17 07:00:00 PM	9.952	9.04	-0.912
07.02.17 07:30:00 PM	9.879	9.04	-0.839
07.02.17 08:00:00 PM	9.879	9.04	-0.839
07.02.17 08:30:00 PM	9.854	9.04	-0.814
07.02.17 09:00:00 PM	9.608	9.04	-0.568
07.02.17 09:30:00 PM	9.163	9.064	-0.099
07.02.17 10:00:00 PM	9.139	9.064	-0.075
07.02.17 10:30:00 PM	9.139	9.064	-0.075
07.02.17 11:00:00 PM	9.015	9.064	0.049
07.02.17 11:30:00 PM	8.767	9.064	0.297
07.03.17 12:00:00 AM	8.543	9.089	0.546
07.03.17 12:30:00 AM	8.344	9.089	0.745
07.03.17 01:00:00 AM	8.319	9.089	0.77
07.03.17 01:30:00 AM	8.27	9.089	0.819
07.03.17 02:00:00 AM	8.02	9.089	1.069
07.03.17 02:30:00 AM	8.045	9.064	1.019
07.03.17 03:00:00 AM	8.245	9.089	0.844
07.03.17 03:30:00 AM	8.195	9.089	0.894
07.03.17 04:00:00 AM	8.17	9.089	0.919
07.03.17 04:30:00 AM	8.045	9.089	1.044
07.03.17 05:00:00 AM	7.995	9.114	1.119
07.03.17 05:30:00 AM	7.87	9.089	1.219
07.03.17 06:00:00 AM	7.77	9.089	1.319
07.03.17 06:30:00 AM	7.695	9.114	1.419
07.03.17 07:00:00 AM	7.619	9.089	1.47
07.03.17 07:30:00 AM	7.67	9.114	1.444
07.03.17 08:00:00 AM	7.77	9.114	1.344
07.03.17 08:30:00 AM	7.82	9.114	1.294
07.03.17 09:00:00 AM	7.995	9.114	1.119
07.03.17 09:30:00 AM	8.195	9.114	0.919
07.03.17 10:00:00 AM	8.494	9.114	0.62
07.03.17 10:30:00 AM	8.643	9.139	0.496
07.03.17 11:00:00 AM	8.99	9.139	0.149
07.03.17 11:30:00 AM	9.163	9.139	-0.024
07.03.17 12:00:00 PM	9.312	9.139	-0.173
07.03.17 12:30:00 PM	9.509	9.139	-0.37
07.03.17 01:00:00 PM	10.467	9.139	-1.328
07.03.17 01:30:00 PM	10.761	9.163	-1.598
07.03.17 02:00:00 PM	10.075	9.163	-0.912
07.03.17 02:30:00 PM	10.492	9.163	-1.329
07.03.17 03:00:00 PM	9.928	9.188	-0.74
07.03.17 03:30:00 PM	9.583	9.188	-0.395
07.03.17 04:00:00 PM	9.632	9.188	-0.444
07.03.17 04:30:00 PM	9.608	9.213	-0.395
07.03.17 05:00:00 PM	9.114	9.213	0.099
07.03.17 05:30:00 PM	8.419	9.213	0.794
07.03.17 06:00:00 PM	7.995	9.188	1.193
07.03.17 06:30:00 PM	8.419	9.188	0.769
07.03.17 07:00:00 PM	8.344	9.163	0.819
07.03.17 07:30:00 PM	8.419	9.163	0.744
07.03.17 08:00:00 PM	8.519	9.163	0.644
07.03.17 08:30:00 PM	8.22	9.163	0.943
07.03.17 09:00:00 PM	8.295	9.163	0.868
07.03.17 09:30:00 PM	8.27	9.163	0.893
07.03.17 10:00:00 PM	7.845	9.139	1.294
07.03.17 10:30:00 PM	7.92	9.139	1.219
07.03.17 11:00:00 PM	7.569	9.114	1.545
07.03.17 11:30:00 PM	6.965	9.114	2.149
07.04.17 12:00:00 AM	6.458	9.114	2.656
07.04.17 12:30:00 AM	6.102	9.089	2.987
07.04.17 01:00:00 AM	5.924	9.064	3.14
07.04.17 01:30:00 AM	5.693	9.064	3.371
07.04.17 02:00:00 AM	5.437	9.04	3.603
07.04.17 02:30:00 AM	5.308	9.015	3.707
07.04.17 03:00:00 AM	5.076	9.015	3.939
07.04.17 03:30:00 AM	5.257	8.99	3.733
07.04.17 04:00:00 AM	5.308	8.965	3.657
07.04.17 04:30:00 AM	5.565	8.965	3.4
07.04.17 05:00:00 AM	5.539	8.965	3.426
07.04.17 05:30:00 AM	5.796	8.99	3.194
07.04.17 06:00:00 AM	6.179	9.015	2.836
07.04.17 06:30:00 AM	6.458	8.99	2.532
07.04.17 07:00:00 AM	6.102	8.99	2.888
07.04.17 07:30:00 AM	6.051	9.015	2.964
07.04.17 08:00:00 AM	6.433	8.965	2.532
07.04.17 08:30:00 AM	6.763	8.965	2.202
07.04.17 09:00:00 AM	7.091	8.965	1.874
07.04.17 09:30:00 AM	8.17	8.965	0.795
07.04.17 10:00:00 AM	9.287	8.965	-0.322
07.04.17 10:30:00 AM	9.41	9.015	-0.395
07.04.17 11:00:00 AM	10.124	9.015	-1.109
07.04.17 11:30:00 AM	9.756	9.064	-0.692
07.04.17 12:00:00 PM	10.443	9.064	-1.379
07.04.17 12:30:00 PM	10.051	9.114	-0.937
07.04.17 01:00:00 PM	10.345	9.114	-1.231
07.04.17 01:30:00 PM	9.657	9.139	-0.518
07.04.17 02:00:00 PM	9.854	9.114	-0.74
07.04.17 02:30:00 PM	9.756	9.139	-0.617
07.04.17 03:00:00 PM	9.854	9.139	-0.715
07.04.17 03:30:00 PM	9.657	9.114	-0.543
07.04.17 04:00:00 PM	9.064	9.139	0.075
07.04.17 04:30:00 PM	9.064	9.139	0.075
07.04.17 05:00:00 PM	8.841	9.163	0.322
07.04.17 05:30:00 PM	8.891	9.238	0.347
07.04.17 06:00:00 PM	8.891	9.287	0.396
07.04.17 06:30:00 PM	8.817	9.336	0.519
07.04.17 07:00:00 PM	8.792	9.287	0.495
07.04.17 07:30:00 PM	8.245	9.238	0.993
07.04.17 08:00:00 PM	8.27	9.238	0.968
07.04.17 08:30:00 PM	8.295	9.213	0.918
07.04.17 09:00:00 PM	8.12	9.238	1.118
07.04.17 09:30:00 PM	7.92	9.287	1.367
07.04.17 10:00:00 PM	7.67	9.361	1.691
07.04.17 10:30:00 PM	7.645	9.361	1.716
07.04.17 11:00:00 PM	7.645	9.361	1.716
07.04.17 11:30:00 PM	7.494	9.312	1.818
07.05.17 12:00:00 AM	7.192	9.41	2.218
07.05.17 12:30:00 AM	7.217	9.361	2.144
07.05.17 01:00:00 AM	7.268	9.312	2.044
07.05.17 01:30:00 AM	7.368	9.287	1.919
07.05.17 02:00:00 AM	7.419	9.287	1.868
07.05.17 02:30:00 AM	7.393	9.262	1.869
07.05.17 03:00:00 AM	7.242	9.262	2.02
07.05.17 03:30:00 AM	6.661	9.262	2.601
07.05.17 04:00:00 AM	6.458	9.238	2.78
07.05.17 04:30:00 AM	6.737	9.238	2.501
07.05.17 05:00:00 AM	6.813	9.238	2.425
07.05.17 05:30:00 AM	6.763	9.213	2.45
07.05.17 06:00:00 AM	6.636	9.213	2.577
07.05.17 06:30:00 AM	6.179	9.213	3.034
07.05.17 07:00:00 AM	5.949	9.188	3.239
07.05.17 07:30:00 AM	5.872	9.188	3.316
07.05.17 08:00:00 AM	6.051	9.163	3.112
07.05.17 08:30:00 AM	6.255	9.163	2.908
07.05.17 09:00:00 AM	6.788	9.163	2.375
07.05.17 09:30:00 AM	7.444	9.163	1.719
07.05.17 10:00:00 AM	8.916	9.163	0.247
07.05.17 10:30:00 AM	9.731	9.163	-0.568
07.05.17 11:00:00 AM	10.222	9.163	-1.059
07.05.17 11:30:00 AM	9.336	9.163	-0.173
07.05.17 12:00:00 PM	10.173	9.163	-1.01
07.05.17 12:30:00 PM	10.026	9.213	-0.813
07.05.17 01:00:00 PM	9.312	9.213	-0.099
07.05.17 01:30:00 PM	9.41	9.262	-0.148
07.05.17 02:00:00 PM	9.312	9.213	-0.099
07.05.17 02:30:00 PM	9.534		-9.534
07.05.17 03:00:00 PM	9.706	9.361	-0.345
07.05.17 03:30:00 PM	9.657	9.238	-0.419
07.05.17 04:00:00 PM	9.46	9.238	-0.222
07.05.17 04:30:00 PM	9.188	9.238	0.05
07.05.17 05:00:00 PM	8.965	9.238	0.273
07.05.17 05:30:00 PM	8.717	9.238	0.521
07.05.17 06:00:00 PM	8.17	9.238	1.068
07.05.17 06:30:00 PM	7.619	9.238	1.619
07.05.17 07:00:00 PM	7.494	9.213	1.719
07.05.17 07:30:00 PM	7.217	9.213	1.996
07.05.17 08:00:00 PM	7.066	9.213	2.147
07.05.17 08:30:00 PM	7.116	9.213	2.097
07.05.17 09:00:00 PM	7.318	9.213	1.895
07.05.17 09:30:00 PM	7.393	9.213	1.82
07.05.17 10:00:00 PM	7.695	9.213	1.518
07.05.17 10:30:00 PM	7.845	9.213	1.368
07.05.17 11:00:00 PM	7.895	9.213	1.318
07.05.17 11:30:00 PM	7.895	9.213	1.318
07.06.17 12:00:00 AM	7.895	9.213	1.318
07.06.17 12:30:00 AM	7.87	9.213	1.343
07.06.17 01:00:00 AM	7.795	9.213	1.418
07.06.17 01:30:00 AM	7.72	9.213	1.493
07.06.17 02:00:00 AM	7.745	9.213	1.468
07.06.17 02:30:00 AM	7.72	9.213	1.493
07.06.17 03:00:00 AM	7.645	9.213	1.568
07.06.17 03:30:00 AM	7.619	9.238	1.619
07.06.17 04:00:00 AM	7.619	9.238	1.619
07.06.17 04:30:00 AM	7.645	9.238	1.593
07.06.17 05:00:00 AM	7.619	9.238	1.619
07.06.17 05:30:00 AM	7.469	9.238	1.769
07.06.17 06:00:00 AM	7.494	9.238	1.744
07.06.17 06:30:00 AM	7.569	9.238	1.669
07.06.17 07:00:00 AM	7.695	9.238	1.543
07.06.17 07:30:00 AM	7.67	9.238	1.568
07.06.17 08:00:00 AM	7.494	9.238	1.744
07.06.17 08:30:00 AM	7.519	9.238	1.719
07.06.17 09:00:00 AM	7.544	9.238	1.694
07.06.17 09:30:00 AM	7.544	9.238	1.694
07.06.17 10:00:00 AM	7.645	9.238	1.593
07.06.17 10:30:00 AM	7.745	9.238	1.493
07.06.17 11:00:00 AM	7.87	9.238	1.368
07.06.17 11:30:00 AM	7.97	9.238	1.268
07.06.17 12:00:00 PM	8.145	9.238	1.093
07.06.17 12:30:00 PM	8.319	9.238	0.919
07.06.17 01:00:00 PM	8.444	9.238	0.794
07.06.17 01:30:00 PM	8.519	9.238	0.719
07.06.17 02:00:00 PM	8.519	9.262	0.743
07.06.17 02:30:00 PM	8.618	9.262	0.644
07.06.17 03:00:00 PM	8.693	9.262	0.569
07.06.17 03:30:00 PM	8.767	9.262	0.495
07.06.17 04:00:00 PM	8.817	9.262	0.445
07.06.17 04:30:00 PM	8.817	9.262	0.445
07.06.17 05:00:00 PM	8.841	9.262	0.421
07.06.17 05:30:00 PM	8.841	9.287	0.446
07.06.17 06:00:00 PM	8.792	9.287	0.495
07.06.17 06:30:00 PM	8.717	9.287	0.57
07.06.17 07:00:00 PM	8.693	9.287	0.594
07.06.17 07:30:00 PM	8.668	9.287	0.619
07.06.17 08:00:00 PM	8.668	9.287	0.619
07.06.17 08:30:00 PM	8.668	9.287	0.619
07.06.17 09:00:00 PM	8.668	9.287	0.619
07.06.17 09:30:00 PM	8.693	9.312	0.619
07.06.17 10:00:00 PM	8.717	9.312	0.595
07.06.17 10:30:00 PM	8.717	9.312	0.595
07.06.17 11:00:00 PM	8.618	9.312	0.694
07.06.17 11:30:00 PM	8.519	9.312	0.793
07.07.17 12:00:00 AM	8.444	9.336	0.892
07.07.17 12:30:00 AM	8.369	9.336	0.967
07.07.17 01:00:00 AM	8.344	9.312	0.968
07.07.17 01:30:00 AM	8.319	9.312	0.993
07.07.17 02:00:00 AM	8.295	9.336	1.041
07.07.17 02:30:00 AM	8.319	9.336	1.017
07.07.17 03:00:00 AM	8.344	9.336	0.992
07.07.17 03:30:00 AM	8.319	9.336	1.017
07.07.17 04:00:00 AM	8.27	9.336	1.066
07.07.17 04:30:00 AM	8.195	9.361	1.166
07.07.17 05:00:00 AM	8.145	9.336	1.191
07.07.17 05:30:00 AM	8.07	9.361	1.291
07.07.17 06:00:00 AM	8.045	9.361	1.316
07.07.17 06:30:00 AM	7.82	9.361	1.541
07.07.17 07:00:00 AM	7.645	9.361	1.716
07.07.17 07:30:00 AM	7.494	9.361	1.867
07.07.17 08:00:00 AM	7.368	9.361	1.993
07.07.17 08:30:00 AM	7.343	9.361	2.018
07.07.17 09:00:00 AM	7.393	9.361	1.968
07.07.17 09:30:00 AM	7.494	9.361	1.867
07.07.17 10:00:00 AM	7.72	9.361	1.641
07.07.17 10:30:00 AM	7.97	9.361	1.391
07.07.17 11:00:00 AM	8.469	9.361	0.892
07.07.17 11:30:00 AM	8.767	9.361	0.594
07.07.17 12:00:00 PM	8.742	9.361	0.619
07.07.17 12:30:00 PM	9.064	9.361	0.297
07.07.17 01:00:00 PM	9.41	9.361	-0.049
07.07.17 01:30:00 PM	9.558	9.361	-0.197
07.07.17 02:00:00 PM	9.657	9.386	-0.271
07.07.17 02:30:00 PM	9.435	9.386	-0.049
07.07.17 03:00:00 PM	9.435	9.386	-0.049
07.07.17 03:30:00 PM	9.41	9.41	0
07.07.17 04:00:00 PM	9.336	9.41	0.074
07.07.17 04:30:00 PM	9.361	9.41	0.049
07.07.17 05:00:00 PM	8.866	9.41	0.544
07.07.17 05:30:00 PM	8.469	9.41	0.941
07.07.17 06:00:00 PM	8.195	9.41	1.215
07.07.17 06:30:00 PM	7.82	9.41	1.59
07.07.17 07:00:00 PM	7.72	9.386	1.666
07.07.17 07:30:00 PM	7.645	9.386	1.741
07.07.17 08:00:00 PM	7.469	9.386	1.917
07.07.17 08:30:00 PM	7.091	9.386	2.295
07.07.17 09:00:00 PM	6.458	9.386	2.928
07.07.17 09:30:00 PM	5.796	9.361	3.565
07.07.17 10:00:00 PM	5.514	9.361	3.847
07.07.17 10:30:00 PM	5.257	9.336	4.079
07.07.17 11:00:00 PM	4.792	9.312	4.52
07.07.17 11:30:00 PM	4.428	9.312	4.884
07.08.17 12:00:00 AM	4.168	9.287	5.119
07.08.17 12:30:00 AM	3.958	9.238	5.28
07.08.17 01:00:00 AM	3.827	9.238	5.411
07.08.17 01:30:00 AM	3.617	9.213	5.596
07.08.17 02:00:00 AM	3.538	9.188	5.65
07.08.17 02:30:00 AM	3.512	9.163	5.651
07.08.17 03:00:00 AM	3.932	9.114	5.182
07.08.17 03:30:00 AM	4.558	9.114	4.556
07.08.17 04:00:00 AM	5.076	9.114	4.038
07.08.17 04:30:00 AM	5.282	9.114	3.832
07.08.17 05:00:00 AM	4.973	9.114	4.141
07.08.17 05:30:00 AM	4.48	9.089	4.609
07.08.17 06:00:00 AM	4.454	9.064	4.61
07.08.17 06:30:00 AM	4.376	9.064	4.688
07.08.17 07:00:00 AM	4.272	9.04	4.768
07.08.17 07:30:00 AM	4.506	9.015	4.509
07.08.17 08:00:00 AM	4.973	9.015	4.042
07.08.17 08:30:00 AM	5.282	9.04	3.758
07.08.17 09:00:00 AM	5.796	9.04	3.244
07.08.17 09:30:00 AM	6.281	9.04	2.759
07.08.17 10:00:00 AM	7.494	9.04	1.546
07.08.17 10:30:00 AM	8.095	9.04	0.945
07.08.17 11:00:00 AM	8.817	9.04	0.223
07.08.17 11:30:00 AM	9.04	9.064	0.024
07.08.17 12:00:00 PM	8.99	9.064	0.074
07.08.17 12:30:00 PM	9.213	9.064	-0.149
07.08.17 01:00:00 PM	9.163	9.089	-0.074
07.08.17 01:30:00 PM	9.41	9.089	-0.321
07.08.17 02:00:00 PM	8.941	9.089	0.148
07.08.17 02:30:00 PM	9.188	9.114	-0.074
07.08.17 03:00:00 PM	9.188	9.114	-0.074
07.08.17 03:30:00 PM	9.213	9.114	-0.099
07.08.17 04:00:00 PM	9.238	9.114	-0.124
07.08.17 04:30:00 PM	9.361	9.139	-0.222
07.08.17 05:00:00 PM	9.188	9.139	-0.049
07.08.17 05:30:00 PM	9.089	9.139	0.05
07.08.17 06:00:00 PM	9.015	9.163	0.148
07.08.17 06:30:00 PM	8.916	9.163	0.247
07.08.17 07:00:00 PM	8.817	9.163	0.346
07.08.17 07:30:00 PM	8.668	9.163	0.495
07.08.17 08:00:00 PM	8.742	9.163	0.421
07.08.17 08:30:00 PM	8.693	9.188	0.495
07.08.17 09:00:00 PM	8.593	9.188	0.595
07.08.17 09:30:00 PM	8.444	9.188	0.744
07.08.17 10:00:00 PM	8.394	9.188	0.794
07.08.17 10:30:00 PM	8.444	9.188	0.744
07.08.17 11:00:00 PM	8.543	9.188	0.645
07.08.17 11:30:00 PM	8.469	9.213	0.744
07.09.17 12:00:00 AM	8.494	9.213	0.719
07.09.17 12:30:00 AM	8.519	9.213	0.694
07.09.17 01:00:00 AM	8.469	9.213	0.744
07.09.17 01:30:00 AM	8.469	9.213	0.744
07.09.17 02:00:00 AM	8.394	9.213	0.819
07.09.17 02:30:00 AM	8.27	9.213	0.943
07.09.17 03:00:00 AM	8.245	9.238	0.993
07.09.17 03:30:00 AM	8.195	9.238	1.043
07.09.17 04:00:00 AM	8.12	9.238	1.118
07.09.17 04:30:00 AM	8.12	9.238	1.118
07.09.17 05:00:00 AM	8.12	9.238	1.118
07.09.17 05:30:00 AM	8.07	9.262	1.192
07.09.17 06:00:00 AM	8.07	9.262	1.192
07.09.17 06:30:00 AM	8.095	9.262	1.167
07.09.17 07:00:00 AM	8.12	9.262	1.142
07.09.17 07:30:00 AM	8.12	9.262	1.142
07.09.17 08:00:00 AM	8.12	9.262	1.142
07.09.17 08:30:00 AM	8.195	9.262	1.067
07.09.17 09:00:00 AM	8.22	9.287	1.067
07.09.17 09:30:00 AM	8.394	9.287	0.893
07.09.17 10:00:00 AM	8.817	9.287	0.47
07.09.17 10:30:00 AM	9.163	9.287	0.124
07.09.17 11:00:00 AM	10.198	9.287	-0.911
07.09.17 11:30:00 AM	10.59	9.312	-1.278
07.09.17 12:00:00 PM	10.296	9.312	-0.984
07.09.17 12:30:00 PM	10.124	9.336	-0.788
07.09.17 01:00:00 PM	10.271	9.336	-0.935
07.09.17 01:30:00 PM	10.467	9.336	-1.131
07.09.17 02:00:00 PM	9.558	9.361	-0.197
07.09.17 02:30:00 PM	9.064	9.336	0.272
07.09.17 03:00:00 PM	9.064	9.361	0.297
07.09.17 03:30:00 PM	9.163	9.361	0.198
07.09.17 04:00:00 PM	9.089	9.361	0.272
07.09.17 04:30:00 PM	8.817	9.361	0.544
07.09.17 05:00:00 PM	8.543	9.361	0.818
07.09.17 05:30:00 PM	8.245	9.361	1.116
07.09.17 06:00:00 PM	8.045	9.361	1.316
07.09.17 06:30:00 PM	7.895	9.361	1.466
07.09.17 07:00:00 PM	7.845	9.361	1.516
07.09.17 07:30:00 PM	7.745	9.361	1.616
07.09.17 08:00:00 PM	7.67	9.361	1.691
07.09.17 08:30:00 PM	7.569	9.361	1.792
07.09.17 09:00:00 PM	7.444	9.361	1.917
07.09.17 09:30:00 PM	7.393	9.336	1.943
07.09.17 10:00:00 PM	7.318	9.336	2.018
07.09.17 10:30:00 PM	7.419	9.336	1.917
07.09.17 11:00:00 PM	7.519	9.361	1.842
07.09.17 11:30:00 PM	7.594	9.361	1.767
07.10.17 12:00:00 AM	7.469	9.361	1.892
07.10.17 12:30:00 AM	7.393	9.361	1.968
07.10.17 01:00:00 AM	7.393	9.361	1.968
07.10.17 01:30:00 AM	7.519	9.361	1.842
07.10.17 02:00:00 AM	7.494	9.386	1.892
07.10.17 02:30:00 AM	7.594	9.361	1.767
07.10.17 03:00:00 AM	7.544	9.361	1.817
07.10.17 03:30:00 AM	7.519	9.361	1.842
07.10.17 04:00:00 AM	7.419	9.361	1.942
07.10.17 04:30:00 AM	7.444	9.361	1.917
07.10.17 05:00:00 AM	7.419	9.361	1.942
07.10.17 05:30:00 AM	7.393	9.361	1.968
07.10.17 06:00:00 AM	7.318	9.361	2.043
07.10.17 06:30:00 AM	7.217	9.336	2.119
07.10.17 07:00:00 AM	6.965	9.336	2.371
07.10.17 07:30:00 AM	6.661	9.361	2.7
07.10.17 08:00:00 AM	6.484	9.386	2.902
07.10.17 08:30:00 AM	6.763	9.361	2.598
07.10.17 09:00:00 AM	7.368	9.361	1.993
07.10.17 09:30:00 AM	8.17	9.361	1.191
07.10.17 10:00:00 AM	8.841	9.361	0.52
07.10.17 10:30:00 AM	9.46	9.361	-0.099
07.10.17 11:00:00 AM	10.001	9.361	-0.64
07.10.17 11:30:00 AM	10.418	9.361	-1.057
07.10.17 12:00:00 PM	10.663	9.361	-1.302
07.10.17 12:30:00 PM	11.2	9.361	-1.839
07.10.17 01:00:00 PM	10.81	9.41	-1.4
07.10.17 01:30:00 PM	9.78	9.41	-0.37
07.10.17 02:00:00 PM	9.657	9.41	-0.247
07.10.17 02:30:00 PM	10.614	9.41	-1.204
07.10.17 03:00:00 PM	10.198	9.41	-0.788
07.10.17 03:30:00 PM	9.583	9.435	-0.148
07.10.17 04:00:00 PM	9.139	9.46	0.321
07.10.17 04:30:00 PM	8.643	9.46	0.817
07.10.17 05:00:00 PM	7.72	9.46	1.74
07.10.17 05:30:00 PM	7.469	9.46	1.991
07.10.17 06:00:00 PM	6.914	9.46	2.546
07.10.17 06:30:00 PM	6.737	9.435	2.698
07.10.17 07:00:00 PM	6.153	9.41	3.257
07.10.17 07:30:00 PM	5.796	9.386	3.59
07.10.17 08:00:00 PM	6.687	9.386	2.699
07.10.17 08:30:00 PM	6.585	9.386	2.801
07.10.17 09:00:00 PM	6.026	9.361	3.335
07.10.17 09:30:00 PM	6.433	9.361	2.928
07.10.17 10:00:00 PM	6.281	9.336	3.055
07.10.17 10:30:00 PM	6.204	9.336	3.132
07.10.17 11:00:00 PM	6.128	9.336	3.208
07.10.17 11:30:00 PM	5.616	9.312	3.696
07.11.17 12:00:00 AM	5.616	9.312	3.696
07.11.17 12:30:00 AM	5.924	9.287	3.363
07.11.17 01:00:00 AM	6.408	9.287	2.879
07.11.17 01:30:00 AM	5.847	9.287	3.44
07.11.17 02:00:00 AM	5.565	9.287	3.722
07.11.17 02:30:00 AM	5.462	9.262	3.8
07.11.17 03:00:00 AM	5.154	9.238	4.084
07.11.17 03:30:00 AM	4.869	9.213	4.344
07.11.17 04:00:00 AM	4.973	9.213	4.24
07.11.17 04:30:00 AM	5.462	9.163	3.701
07.11.17 05:00:00 AM	5.102	9.163	4.061
07.11.17 05:30:00 AM	5.462	9.139	3.677
07.11.17 06:00:00 AM	5.616	9.139	3.523
07.11.17 06:30:00 AM	5.411	9.114	3.703
07.11.17 07:00:00 AM	4.973	9.089	4.116
07.11.17 07:30:00 AM	4.324	9.064	4.74
07.11.17 08:00:00 AM	4.558	9.064	4.506
07.11.17 08:30:00 AM	5.257	9.015	3.758
07.11.17 09:00:00 AM	6	9.015	3.015
07.11.17 09:30:00 AM	7.091	9.015	1.924
07.11.17 10:00:00 AM	7.594	9.015	1.421
07.11.17 10:30:00 AM	8.245	9.04	0.795
07.11.17 11:00:00 AM	9.015	9.04	0.025
07.11.17 11:30:00 AM	10.345	9.064	-1.281
07.11.17 12:00:00 PM	9.608	9.089	-0.519
07.11.17 12:30:00 PM	10.516	9.089	-1.427
07.11.17 01:00:00 PM	10.443	9.114	-1.329
07.11.17 01:30:00 PM	10.198	9.114	-1.084
07.11.17 02:00:00 PM	10.296	9.139	-1.157
07.11.17 02:30:00 PM	9.805	9.139	-0.666
07.11.17 03:00:00 PM	9.509	9.139	-0.37
07.11.17 03:30:00 PM	8.792	9.163	0.371
07.11.17 04:00:00 PM	8.295	9.163	0.868
07.11.17 04:30:00 PM	8.07	9.163	1.093
07.11.17 05:00:00 PM	8.045	9.163	1.118
07.11.17 05:30:00 PM	7.619	9.163	1.544
07.11.17 06:00:00 PM	6.839	9.163	2.324
07.11.17 06:30:00 PM	6.179	9.139	2.96
07.11.17 07:00:00 PM	6.153	9.139	2.986
07.11.17 07:30:00 PM	5.898	9.139	3.241
07.11.17 08:00:00 PM	5.334	9.114	3.78
07.11.17 08:30:00 PM	5.05	9.114	4.064
07.11.17 09:00:00 PM	4.869	9.089	4.22
07.11.17 09:30:00 PM	4.428	9.064	4.636
07.11.17 10:00:00 PM	4.272	9.064	4.792
07.11.17 10:30:00 PM	4.272	9.015	4.743
07.11.17 11:00:00 PM	4.766	9.015	4.249
07.11.17 11:30:00 PM	5.154	9.015	3.861
07.12.17 12:00:00 AM	5.231	9.015	3.784
07.12.17 12:30:00 AM	5.385	8.99	3.605
07.12.17 01:00:00 AM	5.847	8.99	3.143
07.12.17 01:30:00 AM	5.949	8.99	3.041
07.12.17 02:00:00 AM	6.382	9.015	2.633
07.12.17 02:30:00 AM	6.331	9.015	2.684
07.12.17 03:00:00 AM	6.179	9.015	2.836
07.12.17 03:30:00 AM	6.102	9.04	2.938
07.12.17 04:00:00 AM	5.488	9.064	3.576
07.12.17 04:30:00 AM	5.102	9.015	3.913
07.12.17 05:00:00 AM	5.076	9.015	3.939
07.12.17 05:30:00 AM	5.102	8.99	3.888
07.12.17 06:00:00 AM	5.024	9.015	3.991
07.12.17 06:30:00 AM	4.558	9.015	4.457
07.12.17 07:00:00 AM	4.844	9.015	4.171
07.12.17 07:30:00 AM	4.869	9.015	4.146
07.12.17 08:00:00 AM	4.921	9.015	4.094
07.12.17 08:30:00 AM	4.869	8.99	4.121
07.12.17 09:00:00 AM	5.128	9.089	3.961
07.12.17 09:30:00 AM	5.385	9.139	3.754
07.12.17 10:00:00 AM	6.128	9.163	3.035
07.12.17 10:30:00 AM	6.737	9.114	2.377
07.12.17 11:00:00 AM	6.382	9.163	2.781
07.12.17 11:30:00 AM	6.026	9.114	3.088
07.12.17 12:00:00 PM	5.719	9.089	3.37
07.12.17 12:30:00 PM	5.642	9.064	3.422
07.12.17 01:00:00 PM	5.488	9.064	3.576
07.12.17 01:30:00 PM	5.462	9.04	3.578
07.12.17 02:00:00 PM	5.949	9.04	3.091
07.12.17 02:30:00 PM	5.796	9.015	3.219
07.12.17 03:00:00 PM	5.411	9.015	3.604
07.12.17 03:30:00 PM	5.205	8.99	3.785
07.12.17 04:00:00 PM	4.402	8.965	4.563
07.12.17 04:30:00 PM	4.063	8.941	4.878
07.12.17 05:00:00 PM	3.67	8.916	5.246
07.12.17 05:30:00 PM	3.564	8.891	5.327
07.12.17 06:00:00 PM	3.433	8.891	5.458
07.12.17 06:30:00 PM	3.433	8.866	5.433
07.12.17 07:00:00 PM	3.327	8.841	5.514
07.12.17 07:30:00 PM	3.195	8.817	5.622
07.12.17 08:00:00 PM	3.089	8.817	5.728
07.12.17 08:30:00 PM	3.063	8.792	5.729
07.12.17 09:00:00 PM	2.956	8.767	5.811
07.12.17 09:30:00 PM	2.823	8.742	5.919
07.12.17 10:00:00 PM	2.61	8.717	6.107
07.12.17 10:30:00 PM	2.423	8.717	6.294
07.12.17 11:00:00 PM	2.101	8.668	6.567
07.12.17 11:30:00 PM	1.913	8.668	6.755
07.13.17 12:00:00 AM	1.805	8.643	6.838
07.13.17 12:30:00 AM	1.588	8.618	7.03
07.13.17 01:00:00 AM	1.344	8.568	7.224
07.13.17 01:30:00 AM	1.398	8.568	7.17
07.13.17 02:00:00 AM	1.67	8.543	6.873
07.13.17 02:30:00 AM	1.751	8.543	6.792
07.13.17 03:00:00 AM	1.886	8.519	6.633
07.13.17 03:30:00 AM	1.832	8.494	6.662
07.13.17 04:00:00 AM	1.832	8.469	6.637
[truncated: 14,756 more rows]
