# Supplementary material for: Pacific climate reflected in Waipuna Cave drip water hydrochemistry
Source: Copernicus journal article supplement (doi:10.5194/hess-24-3361-2020), 2020-07-01
Supplement: Supplementary file 7 [file hess-24-3361-2020-supplement.zip]

Archive with 12 entries (12 files):
- HESS-2019-647_Nava-Fernandez_Supplement.docx
- S8.pdf
- S2.pdf
- S3.pdf
- S1.pdf
- HESS-2019-647_figure_tables.xlsx
- S6.pdf
- hess-24-3361-2020-supplement-title-page.pdf
- HESS-2019-647_Nava-Fernandez_Supplement.pdf
- S7.pdf
- S4.pdf
- S5.pdf
