# Supplementary figures and images for: Pacific climate reflected in Waipuna Cave drip water hydrochemistry
Source: Copernicus journal article supplement (doi:10.5194/hess-24-3361-2020), 2020-07-01

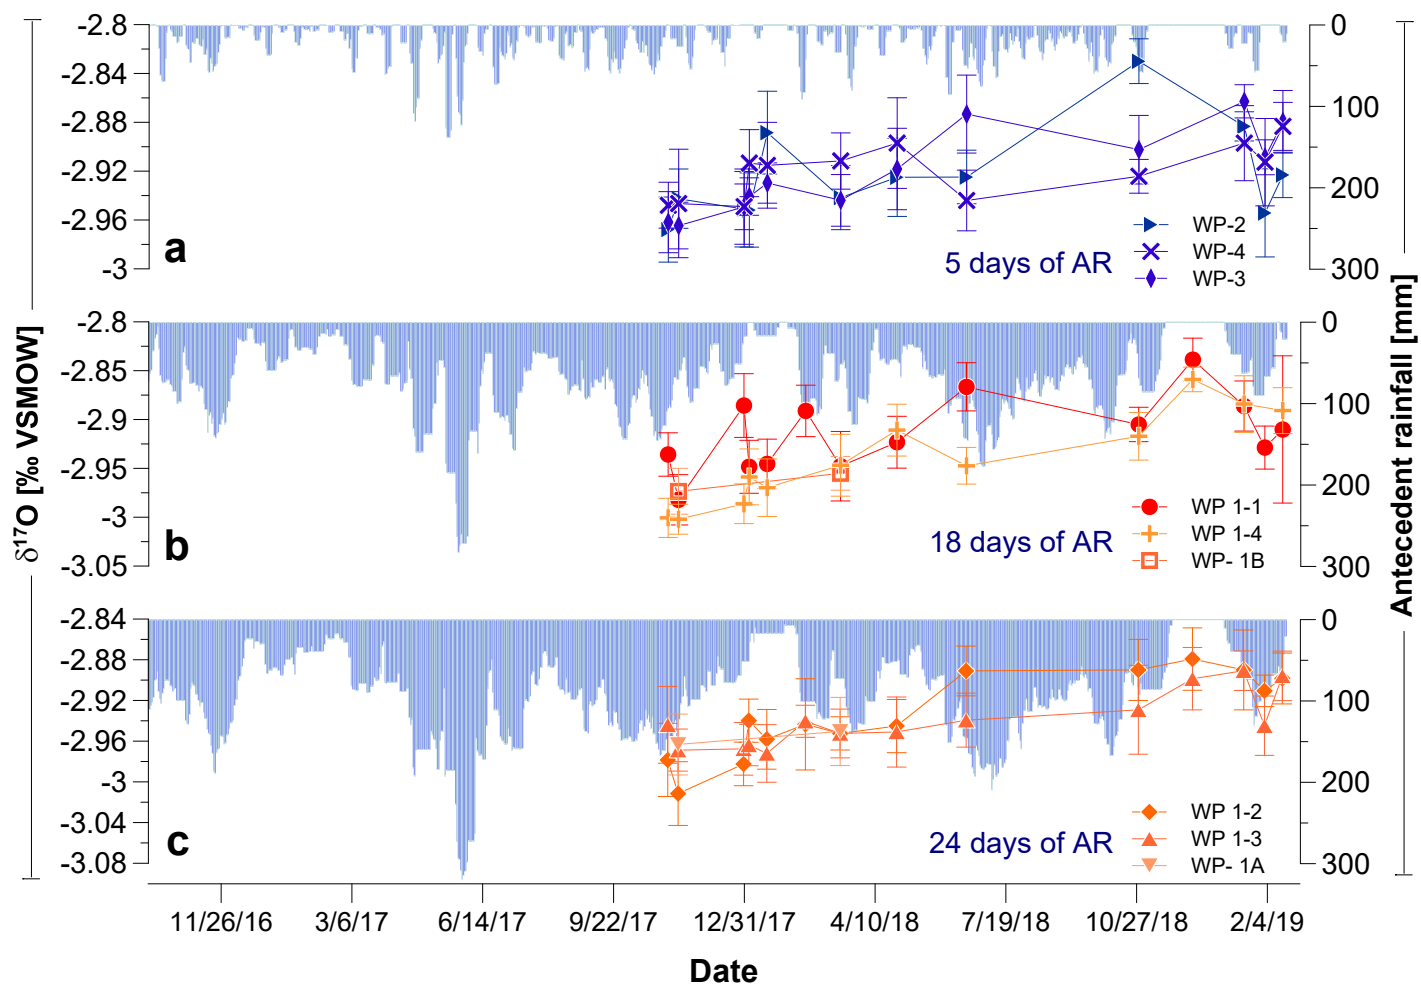

Supplement: Supplementary file 2 [file hess-24-3361-2020-supplement.zip]

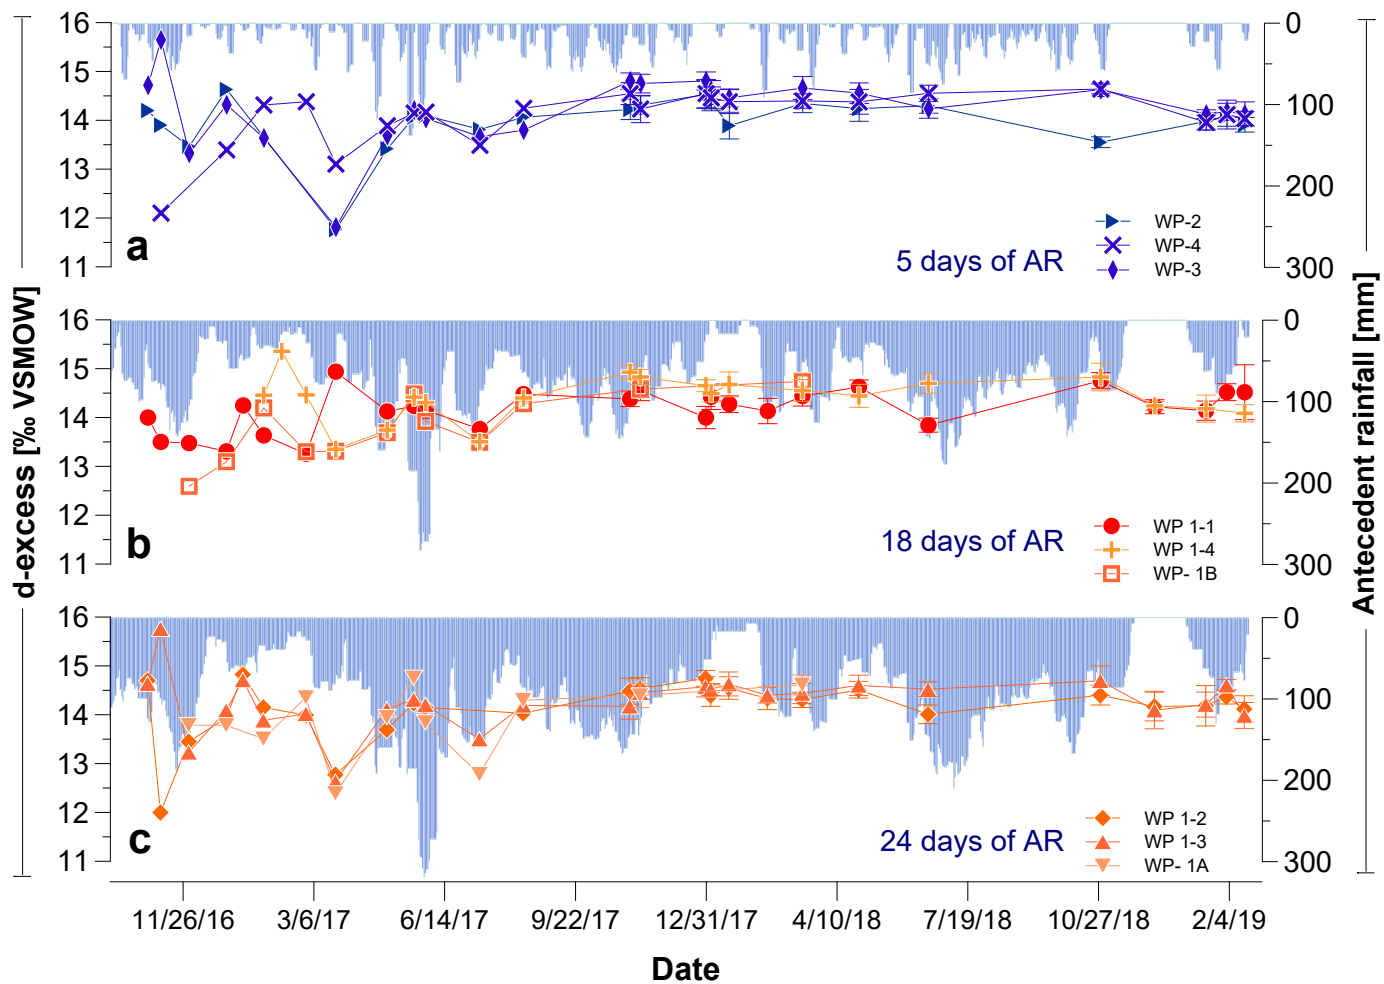

Supplement: Supplementary file 4 [file hess-24-3361-2020-supplement.zip]

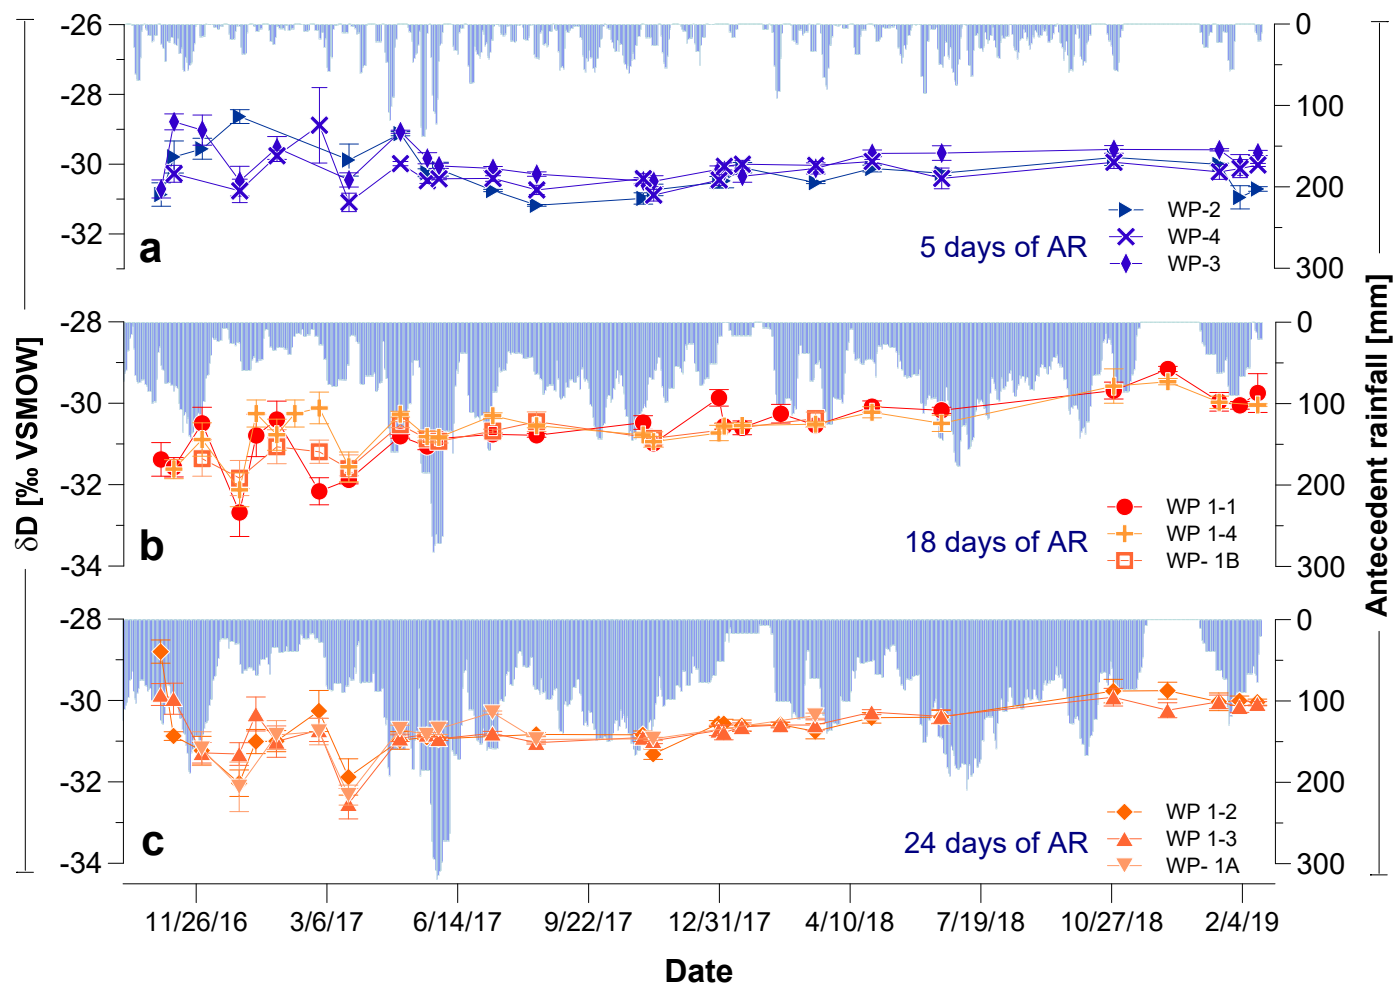

Supplement: Supplementary file 5 [file hess-24-3361-2020-supplement.zip]

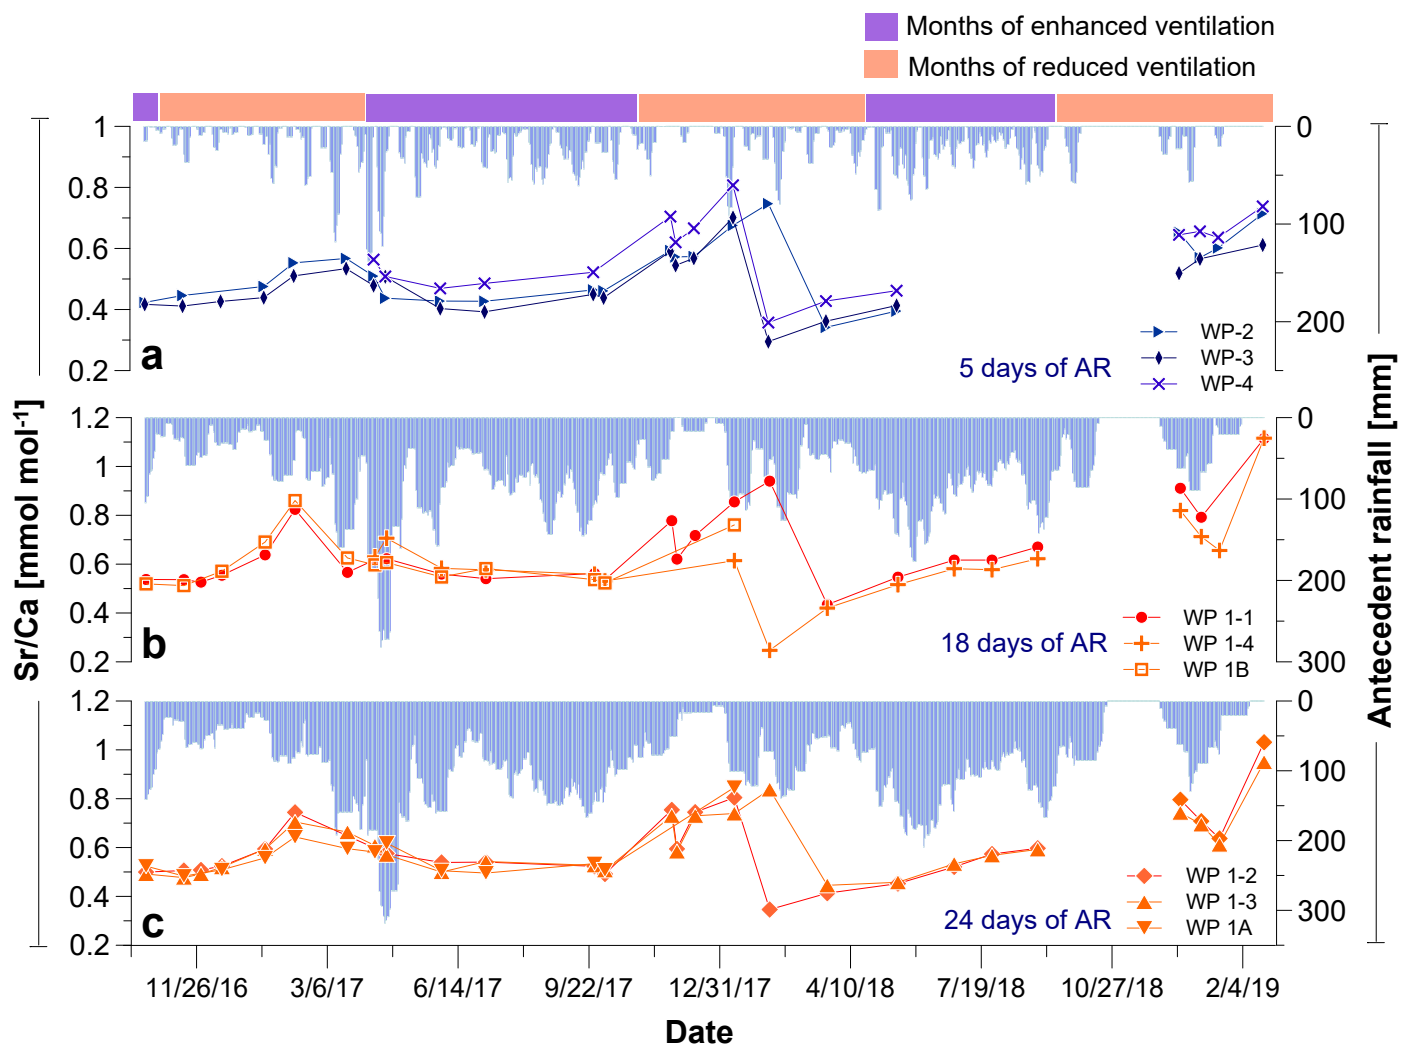

Supplement: Supplementary file 6 [file hess-24-3361-2020-supplement.zip]

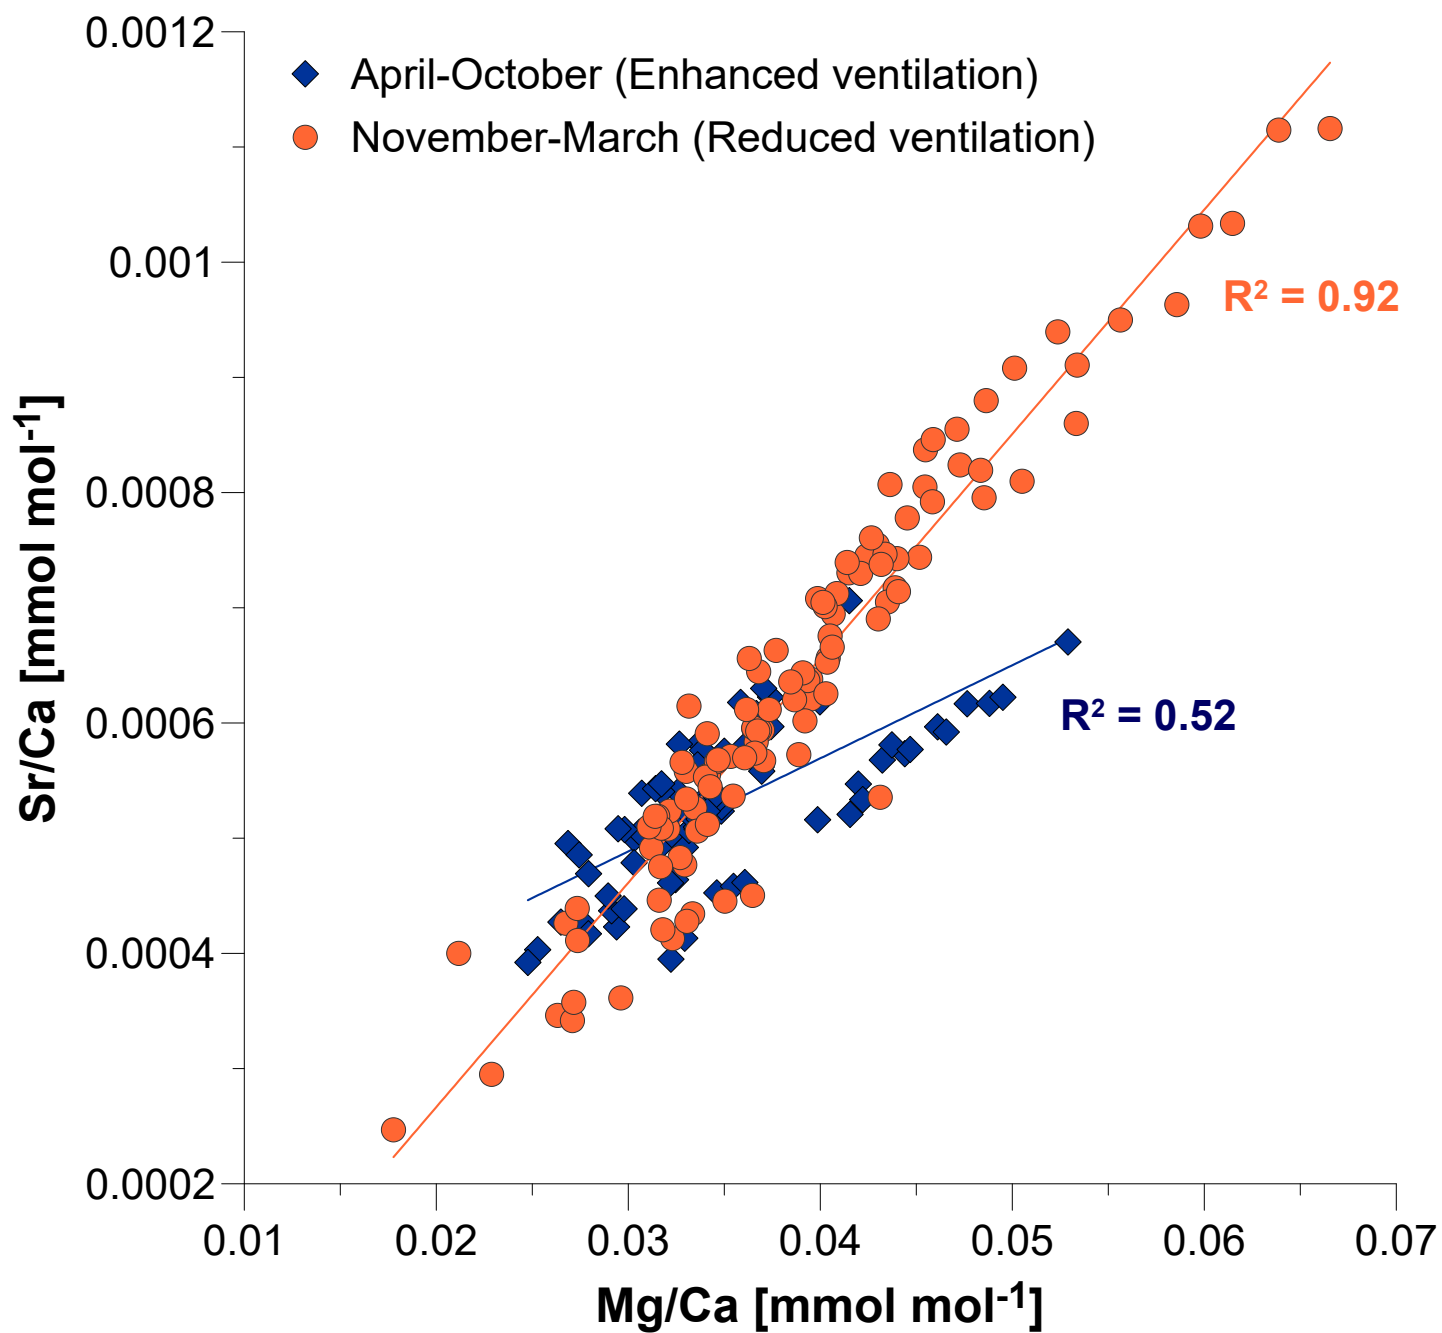

Supplement: Supplementary file 7 [file hess-24-3361-2020-supplement.zip › S8.pdf]

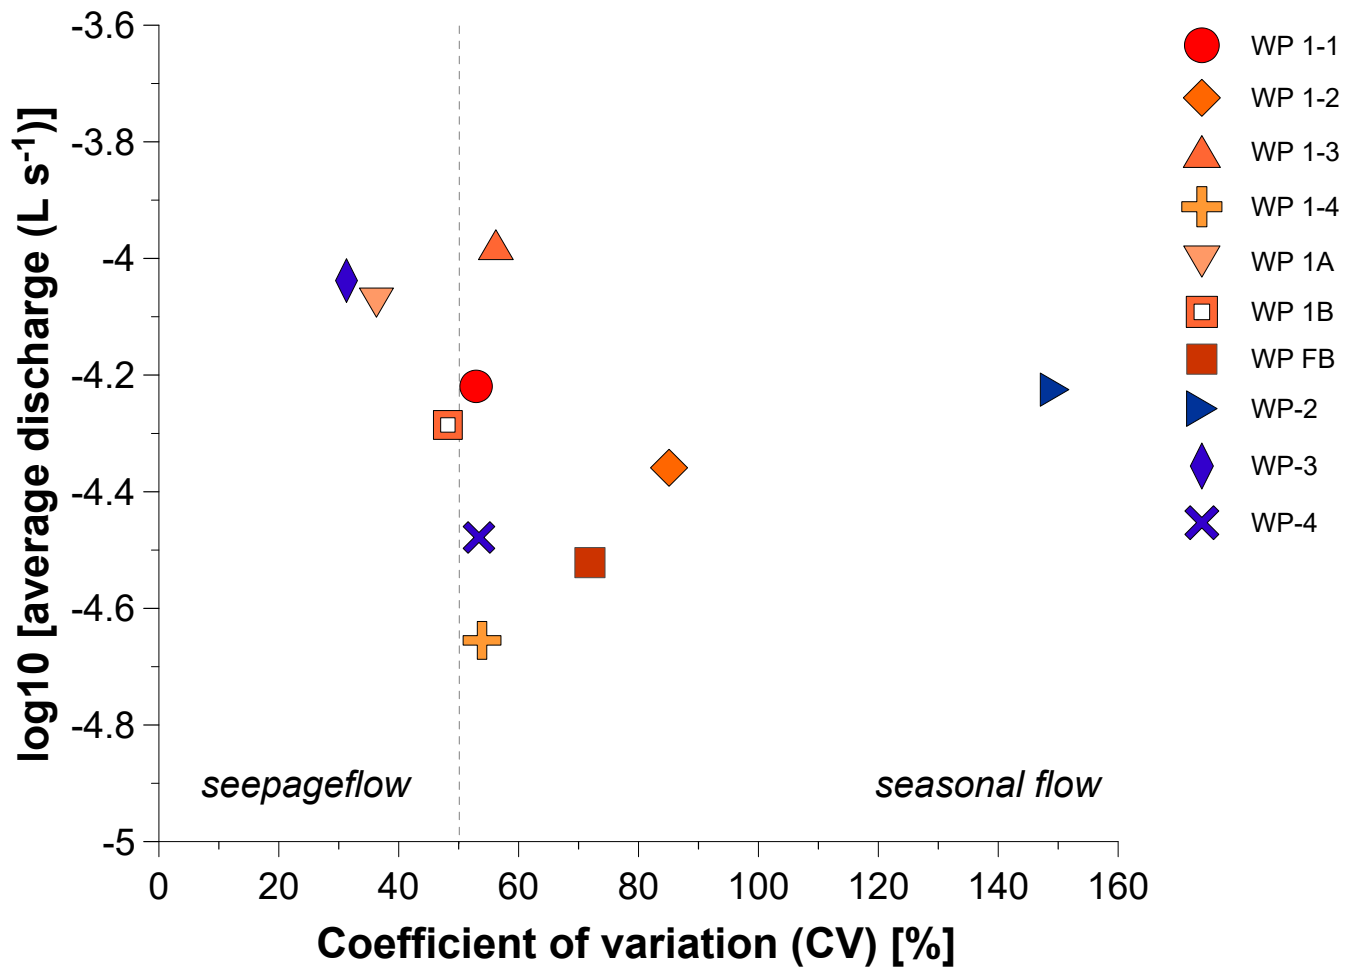

Supplement: Supplementary file 7 [file hess-24-3361-2020-supplement.zip › S2.pdf]

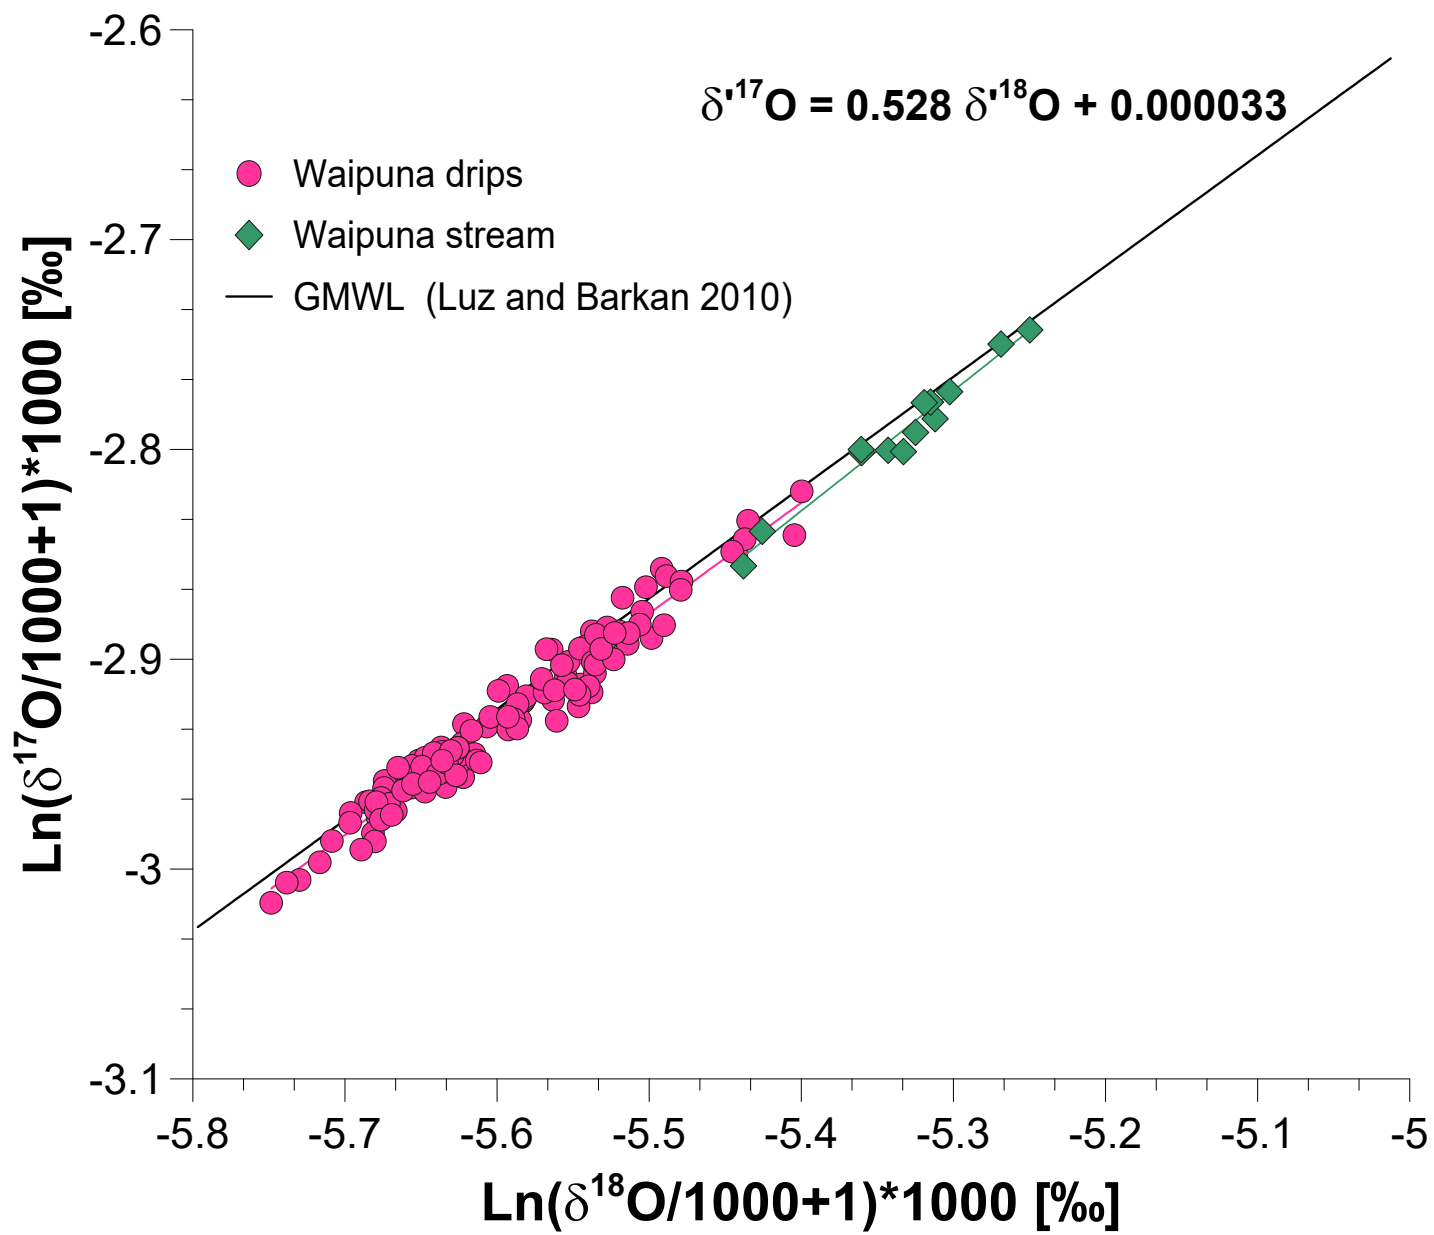

Supplement: Supplementary file 7 [file hess-24-3361-2020-supplement.zip › S3.pdf]

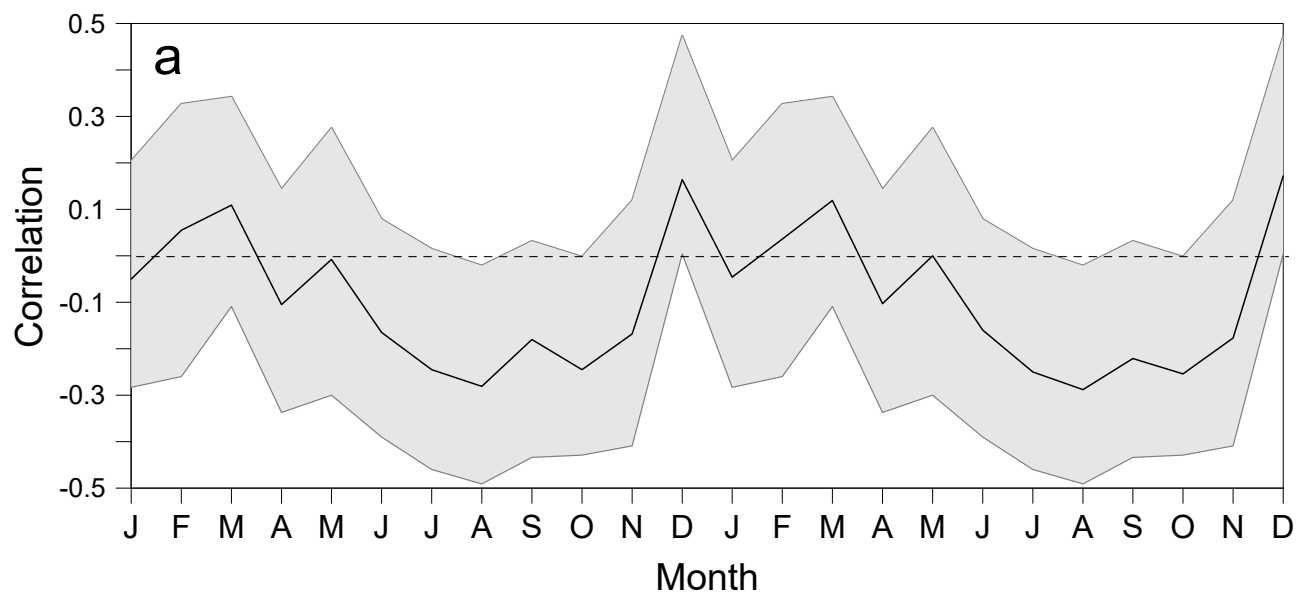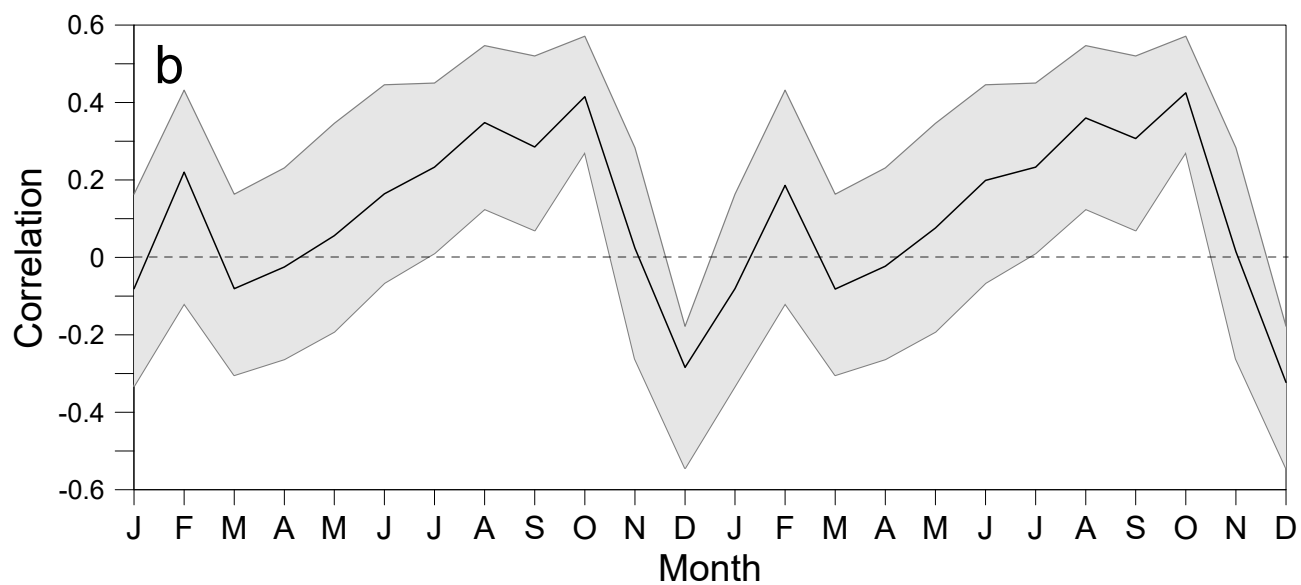

Supplement: Supplementary file 7 [file hess-24-3361-2020-supplement.zip › S1.pdf]
